# Supplementary material for: Anticancer Activity and Mode of Action of Cu(II), Zn(II), and Mn(II) Complexes with 5-Chloro-2-N-(2-quinolylmethylene)aminophenol
Source: MDPI journal article supplement (doi:10.3390/molecules28124876), 2023-06-20
Supplement: s1 [file s1]

**Table S1.** Crystal data and structure refinement for C1-C3.

| Complexes                                 | C1                                                                 | C2                                                                 | C3                                                                              |
|-------------------------------------------|--------------------------------------------------------------------|--------------------------------------------------------------------|---------------------------------------------------------------------------------|
| Empirical formula                         | C <sub>16</sub> H <sub>10</sub> Cl <sub>2</sub> CuN <sub>2</sub> O | C <sub>21</sub> H <sub>15</sub> Cl <sub>2</sub> N <sub>3</sub> OZn | C <sub>17</sub> H <sub>18</sub> Cl <sub>2</sub> MnN <sub>2</sub> O <sub>4</sub> |
| Formula weight                            | 380.70                                                             | 461.63                                                             | 440.17                                                                          |
| Crystal system                            | monoclinic                                                         | triclinic                                                          | triclinic                                                                       |
| Space group                               | P2 <sub>1</sub> /c                                                 | P-1                                                                | P-1                                                                             |
| a/Å                                       | 14.3656(10)                                                        | 9.607(5)                                                           | 7.080(4)                                                                        |
| b/Å                                       | 14.9057(8)                                                         | 10.533(6)                                                          | 11.346(6)                                                                       |
| c/Å                                       | 6.8654(4)                                                          | 11.070(7)                                                          | 13.326(7)                                                                       |
| $\alpha$ /°                               | 90.00                                                              | 79.41(5)                                                           | 107.037(8)                                                                      |
| $\beta$ /°                                | 90.238(6)                                                          | 64.70(6)                                                           | 100.842(9)                                                                      |
| $\gamma$ /°                               | 90.00                                                              | 87.98(4)                                                           | 105.105(9)                                                                      |
| Volume/Å <sup>3</sup>                     | 1470.07(16)                                                        | 994.3(10)                                                          | 946.7(9)                                                                        |
| $\mu$ /mm <sup>-1</sup>                   | 1.850                                                              | 1.520                                                              | 1.004                                                                           |
| F(000)                                    | 764.0                                                              | 468.0                                                              | 450.0                                                                           |
| Reflections collected                     | 6906                                                               | 7331                                                               | 11247                                                                           |
| Goodness-of-fit on F <sup>2</sup>         | 1.076                                                              | 1.009                                                              | 0.959                                                                           |
| Final R indexes [I $\geq$ 2 $\sigma$ (I)] | R <sub>1</sub> = 0.0461, wR <sub>2</sub> = 0.0869                  | R <sub>1</sub> = 0.0751, wR <sub>2</sub> = 0.1902                  | R <sub>1</sub> = 0.0459, wR <sub>2</sub> = 0.1099                               |
| Final R indexes [all data]                | R <sub>1</sub> = 0.0715, wR <sub>2</sub> = 0.0933                  | R <sub>1</sub> = 0.1161, wR <sub>2</sub> = 0.2492                  | R <sub>1</sub> = 0.0899, wR <sub>2</sub> = 0.1350                               |

**Table S2.** Bond lengths /Å and bond angles /° for C1-C3.

| C1         |            |            |            |
|------------|------------|------------|------------|
| Cu1-Cl2    | 2.2479(11) | O1-Cu1-Cl2 | 97.10(9)   |
| Cu1-O1     | 1.959(3)   | O1-Cu1-N2  | 162.74(12) |
| Cu1-N1     | 1.944(3)   | N1-Cu1-Cl2 | 148.78(10) |
| Cu1-N2     | 2.076(3)   | N1-Cu1-O1  | 83.90(12)  |
| N2-Cu1-Cl2 | 99.79(9)   | N1-Cu1-N2  | 79.82(13)  |
| C2         |            |            |            |
| Cl2-Zn     | 2.225(2)   | N2-Zn-Cl2  | 98.25(14)  |
| N2-Zn      | 2.365(5)   | N3-Zn-O1   | 91.4(2)    |
| N3-Zn      | 2.077(6)   | N3-Zn-N2   | 95.2(2)    |
| O1-Zn      | 2.066(5)   | N1-Zn-Cl2  | 134.60(18) |
| N1-Zn      | 2.061(6)   | N1-Zn-O1   | 80.0(2)    |
| N2-Zn-O1   | 153.16(19) | N1-Zn-N2   | 73.3(2)    |
| N3-Zn-Cl2  | 115.96(16) | N1-Zn-N3   | 110.2(2)   |
| C3         |            |            |            |
| Mn1-Cl2    | 2.5214(18) | O1-Mn1-Cl2 | 95.59(8)   |
| Mn1-O1     | 2.187(3)   | O1-Mn1-O2  | 90.69(11)  |
| Mn1-O3     | 2.163(3)   | O1-Mn1-N1  | 73.98(10)  |
| Mn1-O2     | 2.249(4)   | O1-Mn1-N2  | 145.92(10) |
| Mn1-N1     | 2.219(3)   | O3-Mn1-Cl2 | 84.59(10)  |
| Mn1-N2     | 2.364(3)   | O3-Mn1-O1  | 97.30(11)  |
| O2-Mn1-N2  | 86.00(11)  | O3-Mn1-O2  | 87.13(13)  |
| N1-Mn1-Cl2 | 99.51(8)   | O3-Mn1-N1  | 170.61(12) |
| N1-Mn1-O2  | 89.46(11)  | O3-Mn1-N2  | 116.35(12) |
| N1-Mn1-N2  | 72.08(11)  | O2-Mn1-Cl2 | 170.18(9)  |
| N2-Mn1-Cl2 | 92.95(8)   |            |            |

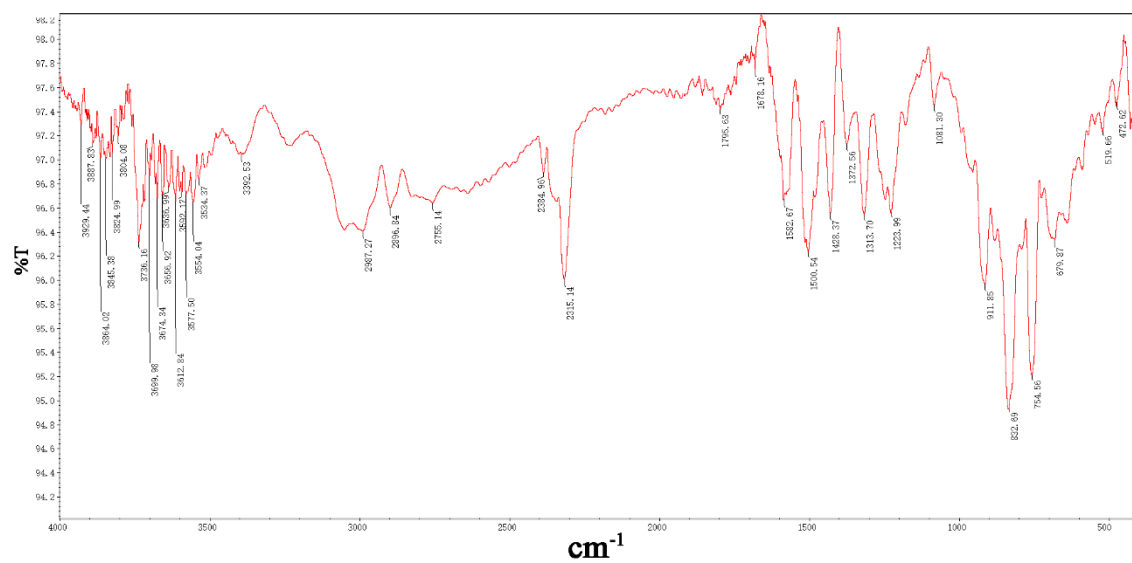

**Figure S1.** IR spectrum of L.

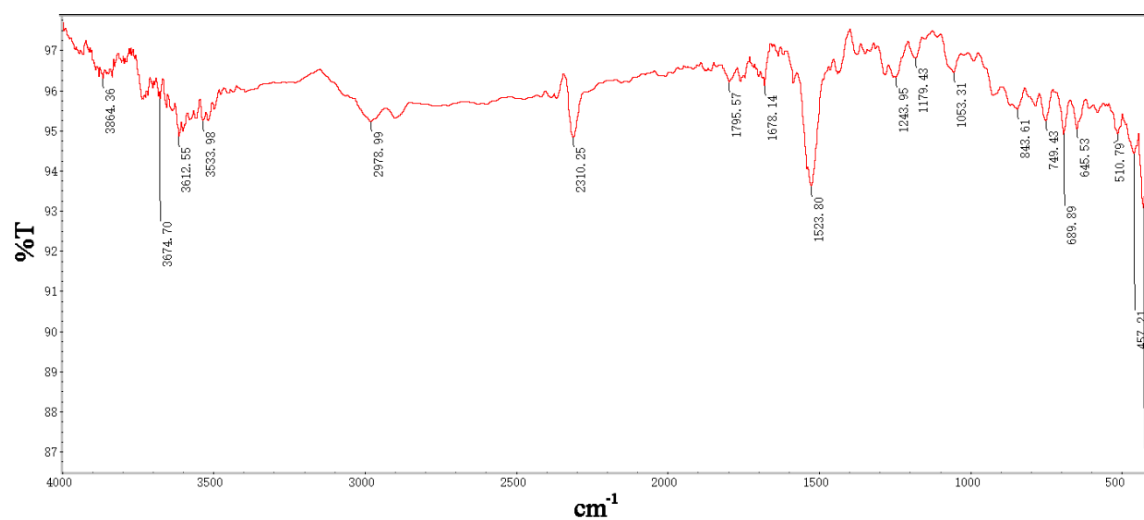

**Figure S2.** IR spectrum of C1.

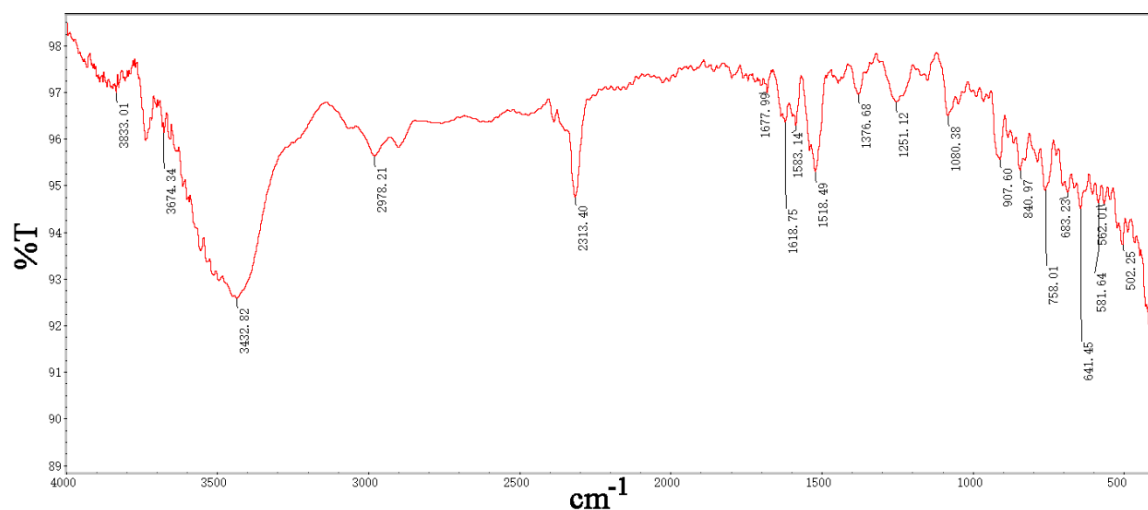

**Figure S3.** IR spectrum of C2.

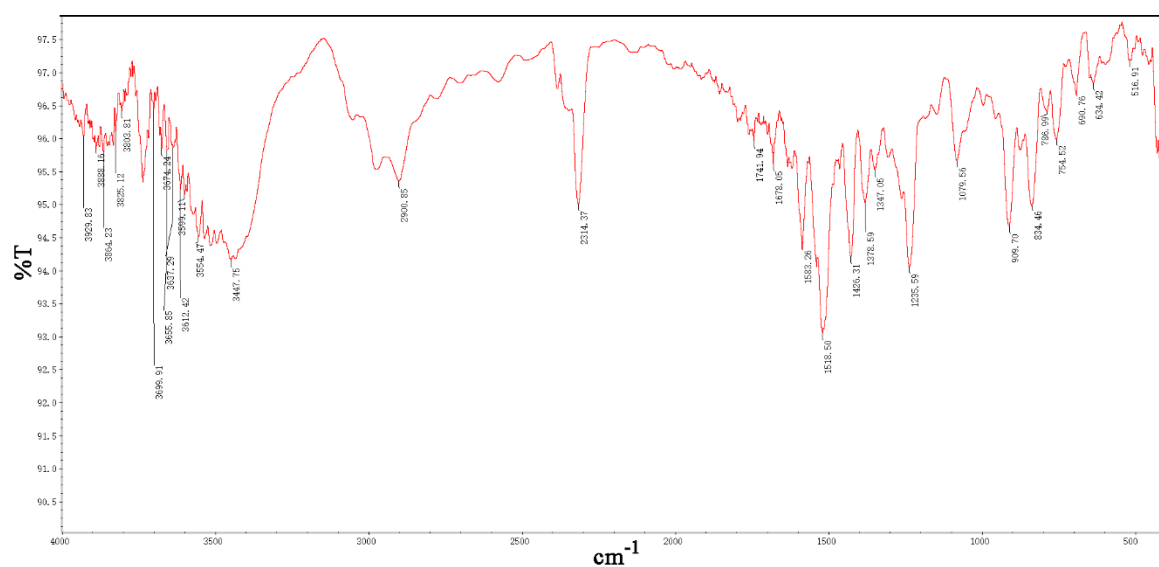

**Figure S4.** IR spectrum of C3.

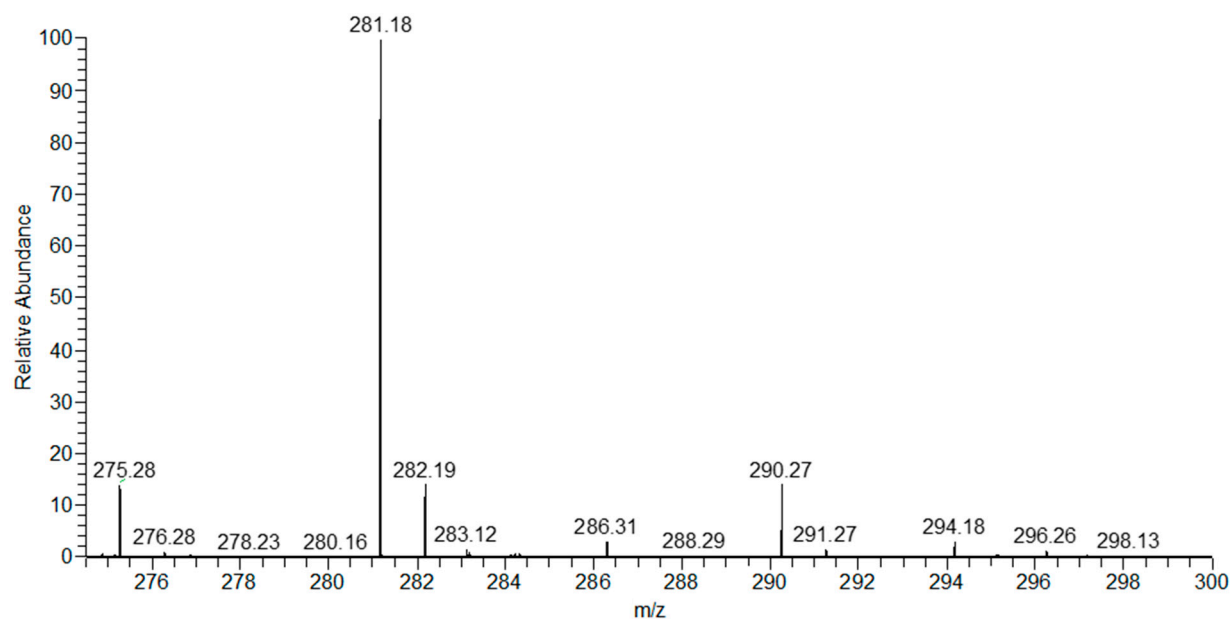

**Figure S5.** The ESI-MS of L.

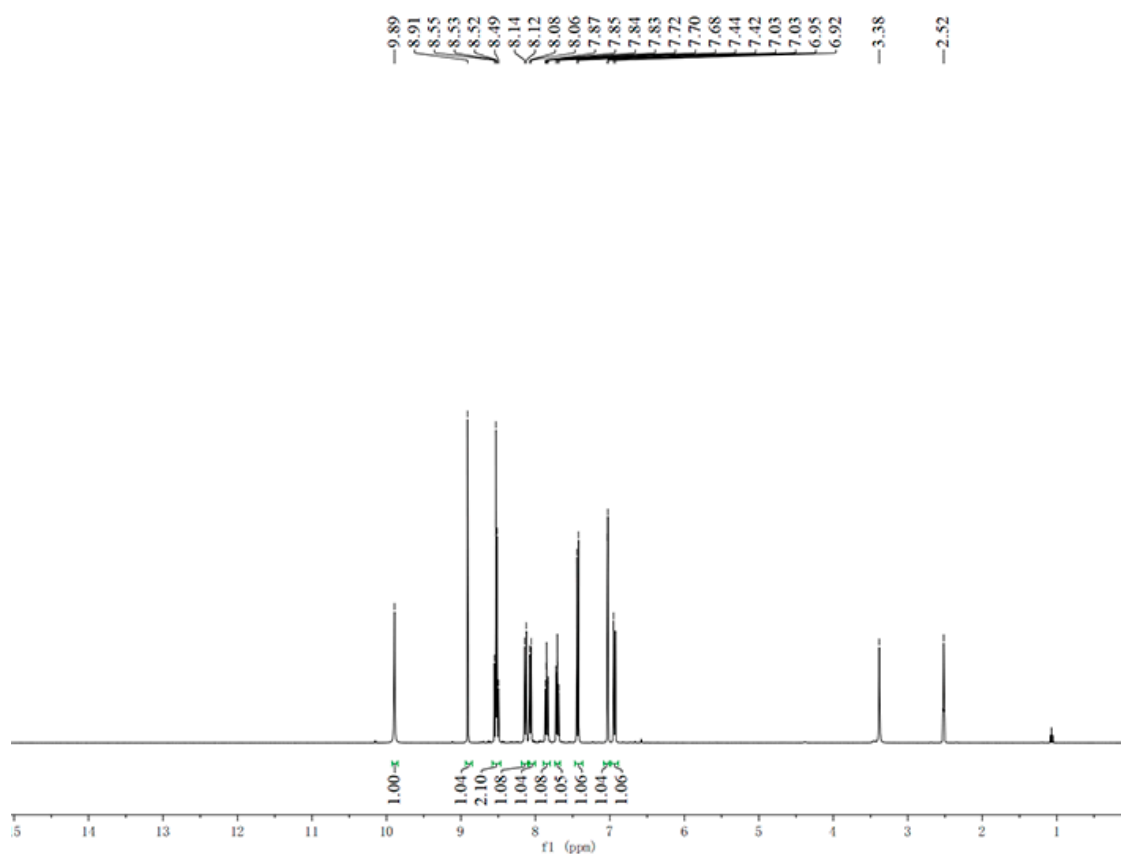

**Figure S6.** <sup>1</sup>H-NMR spectrum of L.

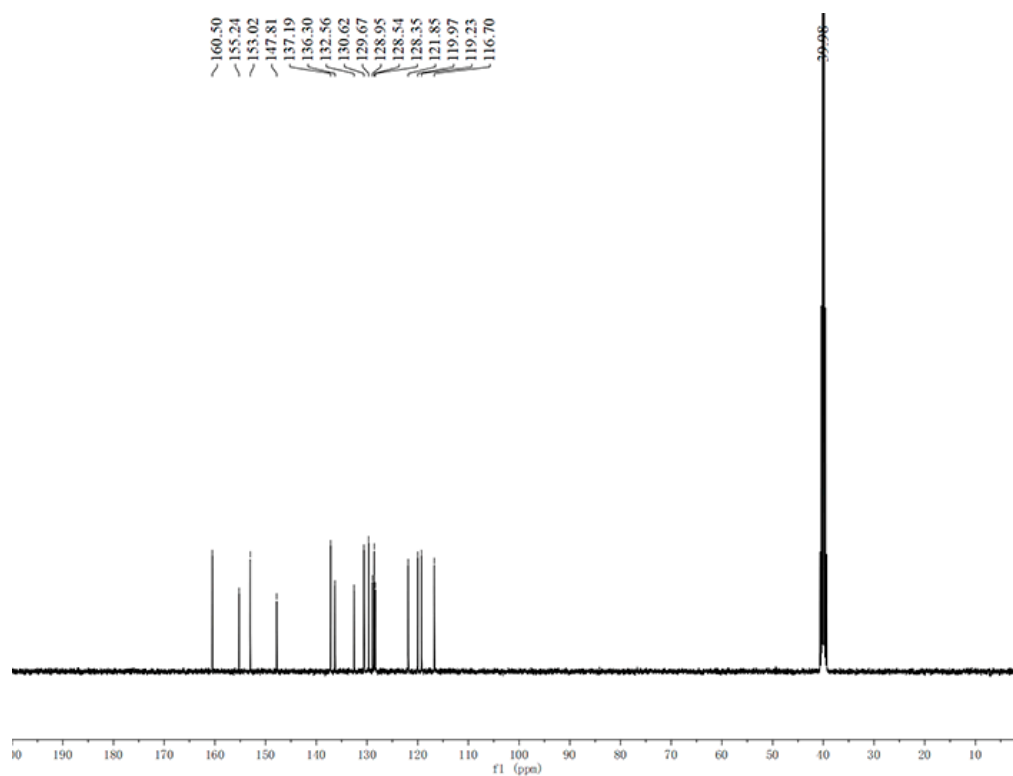

**Figure S7.**  $^{13}\text{C}$ -NMR spectrum of L.

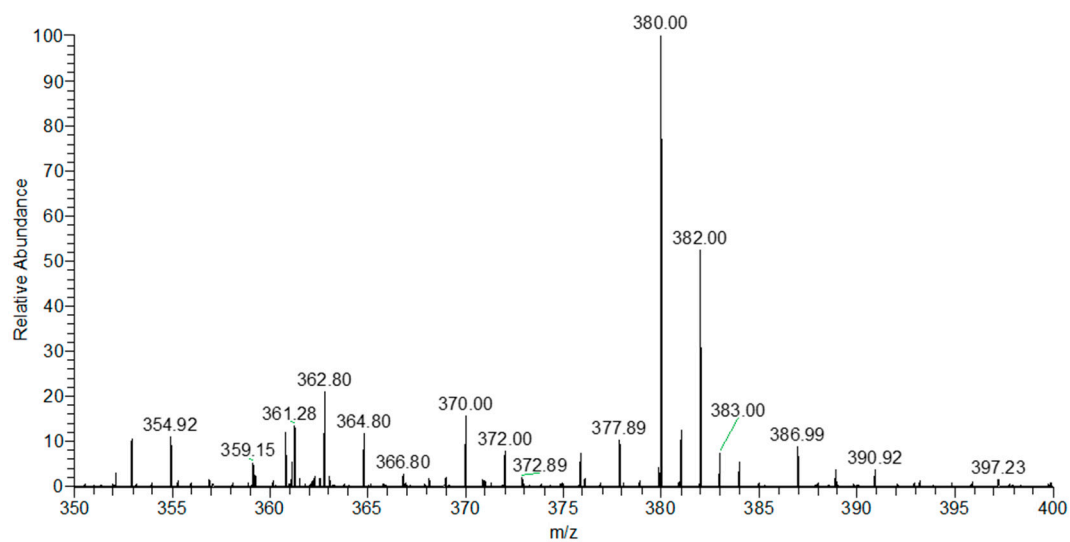

**Figure S8.** The ESI-MS of C1.

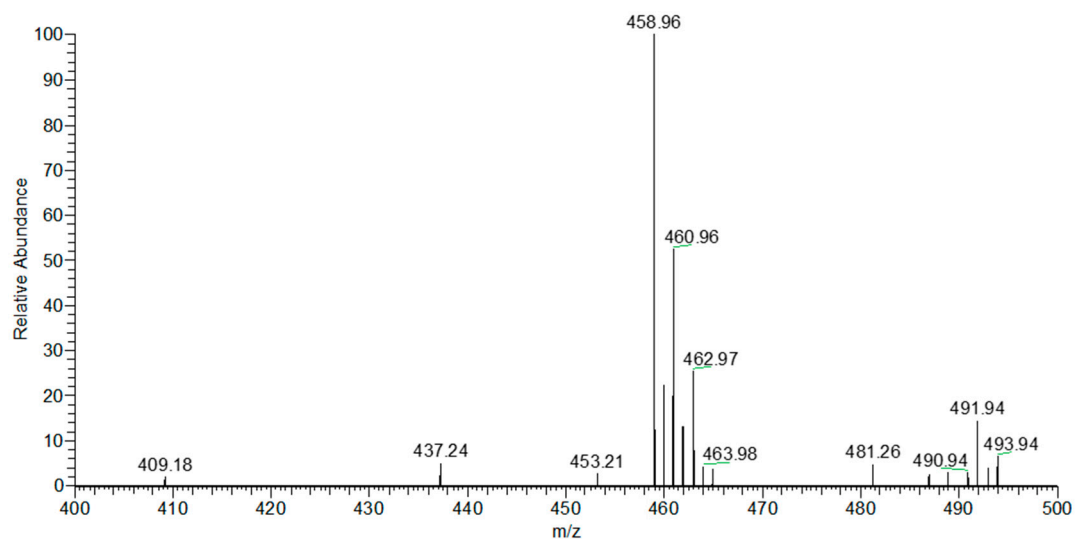

**Figure S9.** The ESI-MS of C2.

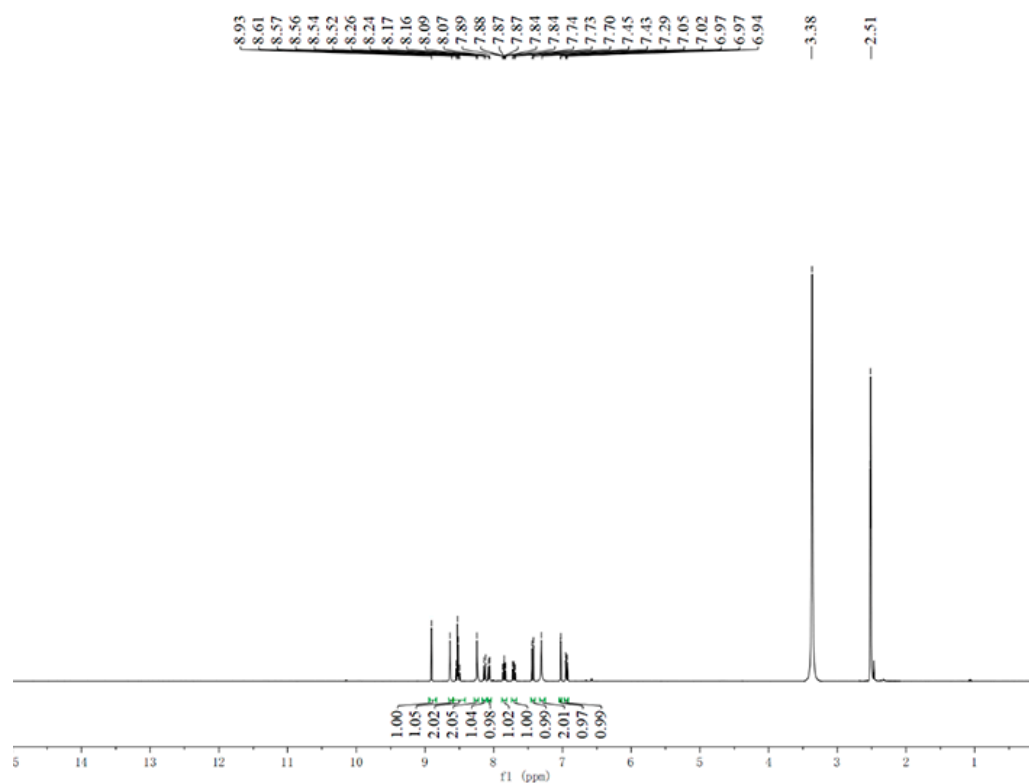

**Figure S10.** <sup>1</sup>H-NMR spectrum of C2.

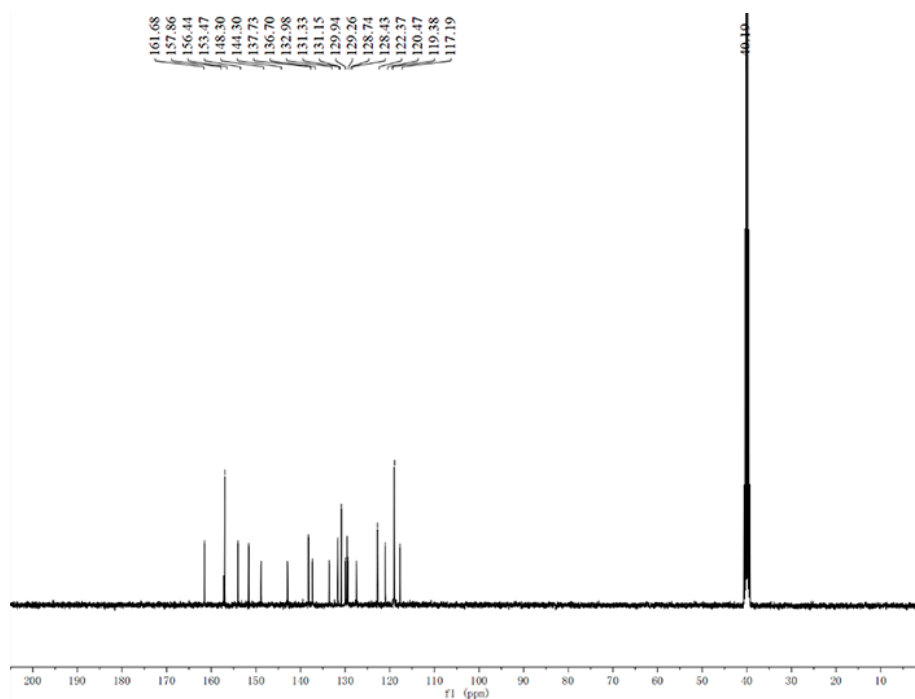

**Figure S11.** <sup>13</sup>C-NMR spectrum of C2.

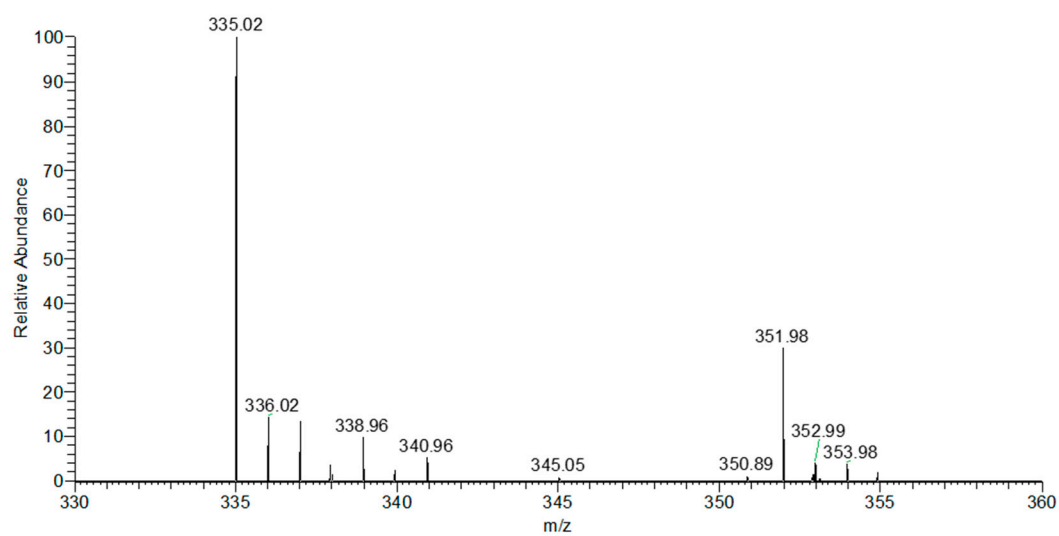

**Figure S12.** The ESI-MS of C3.

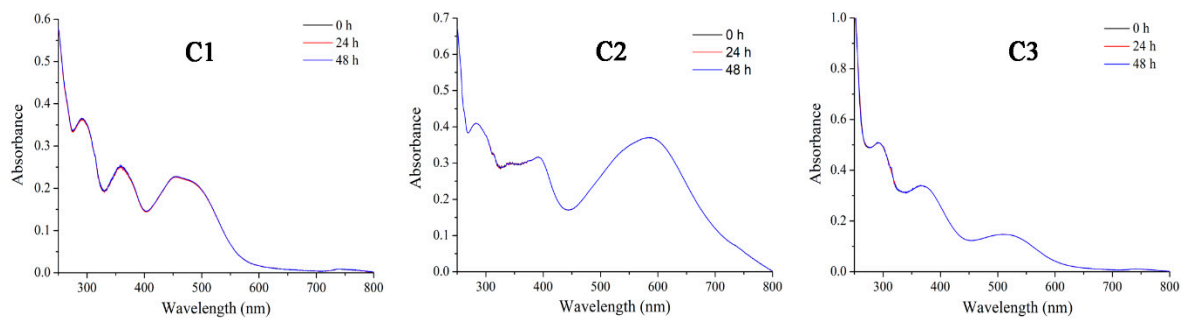

**Figure S13.** UV-vis spectra of complexes C1-C3 in saline.
