# Supplementary material for: Anticancer Activity and Mode of Action of Cu(II), Zn(II), and Mn(II) Complexes with 5-Chloro-2-N-(2-quinolylmethylene)aminophenol
Source: Molecules. 2023 Jun 20;28(12):4876. doi: 10.3390/molecules28124876 (PMC10300901; doi:10.3390/molecules28124876)
Supplement: Supplementary file 1 [file molecules-28-04876-s001.zip]

Archive with 7 entries (7 files):
- C1.cif
- C2.cif
- C3.cif
- checkcif-C1.pdf
- checkcif-C2.pdf
- checkcif-C3.pdf
- molecules-2414837-supplementary.pdf
