# Supplementary material for: Anticancer Activity and Mode of Action of Cu(II), Zn(II), and Mn(II) Complexes with 5-Chloro-2-N-(2-quinolylmethylene)aminophenol
Source: Molecules. 2023 Jun 20;28(12):4876. doi: 10.3390/molecules28124876 (PMC10300901; doi:10.3390/molecules28124876)
Supplement: Supplementary file 1 [file molecules-28-04876-s001.zip › C1.cif]

data_0922-yf-jm-i1310
_audit_creation_date               2023-04-22
_audit_creation_method
;
Olex2 1.5
(compiled 2022.04.07 svn.rca3783a0 for OlexSys, GUI svn.r6498)
;
_audit_contact_author_address      ?
_audit_contact_author_email        ?
_audit_contact_author_name         ''
_audit_contact_author_phone        ?
_publ_contact_author_id_orcid      ?
_publ_section_references
;
Dolomanov, O.V., Bourhis, L.J., Gildea, R.J, Howard, J.A.K. & Puschmann, H.
 (2009), J. Appl. Cryst. 42, 339-341.

Sheldrick, G.M. (2008). Acta Cryst. A64, 112-122.

Sheldrick, G.M. (2015). Acta Cryst. A71, 3-8.
;
_chemical_name_common              ?
_chemical_name_systematic
;
 ? 
;
_chemical_formula_moiety           'C16 H10 Cl2 Cu N2 O'
_chemical_formula_sum              'C16 H10 Cl2 Cu N2 O'
_chemical_formula_weight           380.70
_chemical_melting_point            ?
loop_
  _atom_type_symbol
  _atom_type_description
  _atom_type_scat_dispersion_real
  _atom_type_scat_dispersion_imag
  _atom_type_scat_source
 'C' 'C' 0.0033 0.0016 'International Tables Vol C Tables 4.2.6.8 and 6.1.1.4'
 'H' 'H' 0.0000 0.0000 'International Tables Vol C Tables 4.2.6.8 and 6.1.1.4'
 'Cl' 'Cl' 0.1484 0.1585 'International Tables Vol C Tables 4.2.6.8 and 6.1.1.4'
 'Cu' 'Cu' 0.3201 1.2651 'International Tables Vol C Tables 4.2.6.8 and 6.1.1.4'
 'N' 'N' 0.0061 0.0033 'International Tables Vol C Tables 4.2.6.8 and 6.1.1.4'
 'O' 'O' 0.0106 0.0060 'International Tables Vol C Tables 4.2.6.8 and 6.1.1.4'

_space_group_crystal_system        'monoclinic'
_space_group_IT_number             14
_space_group_name_H-M_alt          'P 1 21/c 1'
_space_group_name_Hall             '-P 2ybc'
loop_
  _space_group_symop_id
  _space_group_symop_operation_xyz
 1 'x, y, z'
 2 '-x, y+1/2, -z+1/2'
 3 '-x, -y, -z'
 4 'x, -y-1/2, z-1/2'

_cell_length_a                     14.3656(10)
_cell_length_b                     14.9057(8)
_cell_length_c                     6.8654(4)
_cell_angle_alpha                  90.00
_cell_angle_beta                   90.238(6)
_cell_angle_gamma                  90.00
_cell_volume                       1470.07(16)
_cell_formula_units_Z              4
_cell_measurement_reflns_used      1922
_cell_measurement_temperature      296.15
_cell_measurement_theta_max        28.4479
_cell_measurement_theta_min        2.9610
_exptl_absorpt_coefficient_mu      1.850
_exptl_absorpt_correction_T_max    1.00000
_exptl_absorpt_correction_T_min    0.80326
_exptl_absorpt_correction_type     multi-scan
_exptl_absorpt_process_details
;
CrysAlisPro, Agilent Technologies,
Version 1.171.35.21 (release 20-01-2012 CrysAlis171 .NET)
(compiled Jan 23 2012,18:06:46)
Empirical absorption correction using spherical harmonics,
 implemented in SCALE3 ABSPACK scaling algorithm.
;
_exptl_crystal_colour              'metallic dark brown'
_exptl_crystal_colour_lustre       metallic
_exptl_crystal_colour_modifier     dark
_exptl_crystal_colour_primary      brown
_exptl_crystal_density_diffrn      1.720
_exptl_crystal_density_meas        ?
_exptl_crystal_density_method      'not measured'
_exptl_crystal_description         plate
_exptl_crystal_F_000               764
_exptl_crystal_preparation         ?
_exptl_crystal_size_max            0.25
_exptl_crystal_size_mid            0.25
_exptl_crystal_size_min            0.19
_exptl_special_details
;
 ? 
;
_diffrn_reflns_av_R_equivalents    0.0559
_diffrn_reflns_av_unetI/netI       0.0752
_diffrn_reflns_limit_h_max         17
_diffrn_reflns_limit_h_min         -17
_diffrn_reflns_limit_k_max         16
_diffrn_reflns_limit_k_min         -17
_diffrn_reflns_limit_l_max         8
_diffrn_reflns_limit_l_min         -7
_diffrn_reflns_number              6906
_diffrn_reflns_theta_full          25.00
_diffrn_reflns_theta_max           25.00
_diffrn_reflns_theta_min           3.08
_diffrn_ambient_temperature        296.15
_diffrn_detector_area_resol_mean   15.9784
_diffrn_measured_fraction_theta_full  0.998
_diffrn_measured_fraction_theta_max  0.998
_diffrn_measurement_details
;
#__ type_ start__ end____ width___ exp.time_
  1 omega  -89.00  -57.00   1.0000   40.0000
omega____ theta____ kappa____ phi______ frames
    -      -20.2108 -178.0000 -180.0000 32

#__ type_ start__ end____ width___ exp.time_
  2 omega  -86.00  -53.00   1.0000   40.0000
omega____ theta____ kappa____ phi______ frames
    -      -20.2108 -178.0000  -90.0000 33

#__ type_ start__ end____ width___ exp.time_
  3 omega   35.00   63.00   1.0000   40.0000
omega____ theta____ kappa____ phi______ frames
    -       21.3827  178.0000  -30.0000 28

#__ type_ start__ end____ width___ exp.time_
  4 omega  -50.00   87.00   1.0000   40.0000
omega____ theta____ kappa____ phi______ frames
    -       21.3827  -19.0000   60.0000 137

#__ type_ start__ end____ width___ exp.time_
  5 omega  -93.00  -19.00   1.0000   40.0000
omega____ theta____ kappa____ phi______ frames
    -      -20.2108  -77.0000 -180.0000 74
;
_diffrn_measurement_device_type    'SuperNova, Single source at offset), Eos'
_diffrn_measurement_method         '\w scans'
_diffrn_orient_matrix_UB_11        -0.0473339000
_diffrn_orient_matrix_UB_12        0.0108168000
_diffrn_orient_matrix_UB_13        0.0173147000
_diffrn_orient_matrix_UB_21        -0.0140622000
_diffrn_orient_matrix_UB_22        -0.0351251000
_diffrn_orient_matrix_UB_23        -0.0633090000
_diffrn_orient_matrix_UB_31        -0.0005788000
_diffrn_orient_matrix_UB_32        -0.0302208000
_diffrn_orient_matrix_UB_33        0.0797993000
_diffrn_radiation_monochromator    mirror
_diffrn_radiation_type             'Mo K\a'
_diffrn_radiation_wavelength       0.71073
_diffrn_source                     'SuperNova (Mo) X-ray Source'
_diffrn_special_details            ?
_diffrn_standards_decay_%          ?
_diffrn_standards_interval_count   ?
_diffrn_standards_interval_time    ?
_diffrn_standards_number           ?
_reflns_number_gt                  1898
_reflns_number_total               2581
_reflns_odcompleteness_completeness  99.84
_reflns_odcompleteness_iscentric   1
_reflns_odcompleteness_theta       26.32
_reflns_threshold_expression       >2sigma(I)
_computing_cell_refinement
;
CrysAlisPro, Agilent Technologies,
Version 1.171.35.21 (release 20-01-2012 CrysAlis171 .NET)
(compiled Jan 23 2012,18:06:46)
;
_computing_data_collection
;
CrysAlisPro, Agilent Technologies,
Version 1.171.35.21 (release 20-01-2012 CrysAlis171 .NET)
(compiled Jan 23 2012,18:06:46)
;
_computing_data_reduction
;
CrysAlisPro, Agilent Technologies,
Version 1.171.35.21 (release 20-01-2012 CrysAlis171 .NET)
(compiled Jan 23 2012,18:06:46)
;
_computing_molecular_graphics      'Olex2 1.5 (Dolomanov et al., 2009)'
_computing_publication_material    'Olex2 1.5 (Dolomanov et al., 2009)'
_computing_structure_refinement    'XL  (Sheldrick, 2008)'
_computing_structure_solution      'SHELXS-97 (Sheldrick, 1990)'
_refine_diff_density_max           0.332
_refine_diff_density_min           -0.381
_refine_diff_density_rms           0.080
_refine_ls_extinction_coef         ?
_refine_ls_extinction_method       none
_refine_ls_goodness_of_fit_ref     1.076
_refine_ls_hydrogen_treatment      mixed
_refine_ls_matrix_type             full
_refine_ls_number_parameters       199
_refine_ls_number_reflns           2581
_refine_ls_number_restraints       0
_refine_ls_R_factor_all            0.0715
_refine_ls_R_factor_gt             0.0461
_refine_ls_restrained_S_all        1.076
_refine_ls_shift/su_max            0.001
_refine_ls_shift/su_mean           0.000
_refine_ls_structure_factor_coef   Fsqd
_refine_ls_weighting_details      
 'calc w=1/[\s^2^(Fo^2^)+(0.0257P)^2^+0.0000P] where P=(Fo^2^+2Fc^2^)/3'
_refine_ls_weighting_scheme        calc
_refine_ls_wR_factor_gt            0.0869
_refine_ls_wR_factor_ref           0.0933
_refine_special_details
;
 Refinement of F^2^ against ALL reflections.  The weighted R-factor wR and 
 goodness of fit S are based on F^2^, conventional R-factors R are based 
 on F, with F set to zero for negative F^2^. The threshold expression of 
 F^2^ > 2sigma(F^2^) is used only for calculating R-factors(gt) etc. and is 
 not relevant to the choice of reflections for refinement.  R-factors based 
 on F^2^ are statistically about twice as large as those based on F, and R- 
 factors based on ALL data will be even larger. 
;
_olex2_refinement_description
;
1. Fixed Uiso
 At 1.2 times of:
  All C(H) groups
2.a Aromatic/amide H refined with riding coordinates:
 C008(H008), C00A(H00A), C00C(H00C), C00E(H00E), C00H(H00H), C00I(H00I),
 C00J(H00J), C00K(H00K), C00L(H00L), C00M(H00M)
;
_atom_sites_solution_hydrogens     geom
_atom_sites_solution_primary       dual
_atom_sites_solution_secondary     difmap
loop_
  _atom_site_label
  _atom_site_type_symbol
  _atom_site_fract_x
  _atom_site_fract_y
  _atom_site_fract_z
  _atom_site_U_iso_or_equiv
  _atom_site_adp_type
  _atom_site_occupancy
  _atom_site_symmetry_multiplicity
  _atom_site_calc_flag
  _atom_site_refinement_flags
  _atom_site_disorder_assembly
  _atom_site_disorder_group
 Cu1 Cu 0.55799(4) 0.70266(3) 0.37631(8) 0.02978(18) Uani 1 1 d . . .
 Cl2 Cl 0.62191(8) 0.82827(7) 0.25461(17) 0.0345(3) Uani 1 1 d . . .
 Cl1 Cl 0.10694(8) 0.69978(9) 0.62968(19) 0.0509(4) Uani 1 1 d . . .
 O1 O 0.44786(19) 0.75904(18) 0.4908(4) 0.0289(7) Uani 1 1 d . . .
 N1 N 0.4755(2) 0.6005(2) 0.3407(5) 0.0221(8) Uani 1 1 d . . .
 N2 N 0.6520(2) 0.6083(2) 0.2731(5) 0.0234(8) Uani 1 1 d . . .
 C007 C 0.6082(3) 0.5344(3) 0.2138(6) 0.0243(10) Uani 1 1 d . . .
 C008 C 0.5094(3) 0.5319(3) 0.2553(6) 0.0247(10) Uani 1 1 d . . .
 H008 H 0.4726 0.4829 0.2216 0.030 Uiso 1 1 calc R . .
 C009 C 0.3762(3) 0.7049(3) 0.4835(6) 0.0252(10) Uani 1 1 d . . .
 C00A C 0.6529(3) 0.4623(3) 0.1222(6) 0.0283(11) Uani 1 1 d . . .
 H00A H 0.6197 0.4119 0.0824 0.034 Uiso 1 1 calc R . .
 C00B C 0.7473(3) 0.6125(3) 0.2526(6) 0.0283(11) Uani 1 1 d . . .
 C00C C 0.2876(3) 0.7288(3) 0.5552(6) 0.0285(11) Uani 1 1 d . . .
 H00C H 0.2786 0.7839 0.6155 0.034 Uiso 1 1 calc R . .
 C00D C 0.3845(3) 0.6178(3) 0.4013(6) 0.0241(10) Uani 1 1 d . . .
 C00E C 0.3092(3) 0.5603(3) 0.3823(6) 0.0287(11) Uani 1 1 d . . .
 H00E H 0.3172 0.5042 0.3253 0.034 Uiso 1 1 calc R . .
 C00F C 0.7962(3) 0.5430(3) 0.1568(6) 0.0324(11) Uani 1 1 d . . .
 C00G C 0.2156(3) 0.6702(3) 0.5351(6) 0.0331(11) Uani 1 1 d . . .
 C00H C 0.7973(3) 0.6851(3) 0.3327(7) 0.0388(12) Uani 1 1 d . . .
 H00H H 0.7661 0.7307 0.3976 0.047 Uiso 1 1 calc R . .
 C00I C 0.7465(3) 0.4683(3) 0.0935(6) 0.0355(12) Uani 1 1 d . . .
 H00I H 0.7775 0.4219 0.0306 0.043 Uiso 1 1 calc R . .
 C00J C 0.2226(3) 0.5858(3) 0.4475(6) 0.0324(11) Uani 1 1 d . . .
 H00J H 0.1710 0.5486 0.4339 0.039 Uiso 1 1 calc R . .
 C00K C 0.8916(3) 0.6880(3) 0.3144(8) 0.0503(14) Uani 1 1 d . . .
 H00K H 0.9244 0.7359 0.3678 0.060 Uiso 1 1 calc R . .
 C00L C 0.8931(3) 0.5490(3) 0.1424(8) 0.0508(15) Uani 1 1 d . . .
 H00L H 0.9259 0.5033 0.0808 0.061 Uiso 1 1 calc R . .
 C00M C 0.9401(4) 0.6204(4) 0.2170(8) 0.0609(17) Uani 1 1 d . . .
 H00M H 1.0044 0.6242 0.2032 0.073 Uiso 1 1 calc R . .

loop_
  _atom_site_aniso_label
  _atom_site_aniso_U_11
  _atom_site_aniso_U_22
  _atom_site_aniso_U_33
  _atom_site_aniso_U_23
  _atom_site_aniso_U_13
  _atom_site_aniso_U_12
 Cu1 0.0307(3) 0.0197(3) 0.0390(3) -0.0030(3) 0.0048(3) -0.0016(3)
 Cl2 0.0387(7) 0.0231(6) 0.0417(7) 0.0058(6) 0.0011(6) -0.0038(5)
 Cl1 0.0313(7) 0.0643(9) 0.0570(8) -0.0093(8) 0.0094(6) 0.0094(7)
 O1 0.0286(17) 0.0227(16) 0.0355(17) -0.0027(15) 0.0038(14) -0.0015(14)
 N1 0.026(2) 0.0197(19) 0.0203(19) 0.0020(17) 0.0010(16) 0.0020(16)
 N2 0.025(2) 0.0219(19) 0.0234(19) 0.0007(17) 0.0003(16) 0.0010(16)
 C007 0.030(3) 0.020(2) 0.023(2) 0.001(2) 0.003(2) 0.003(2)
 C008 0.030(3) 0.020(2) 0.023(2) 0.001(2) -0.003(2) -0.002(2)
 C009 0.031(2) 0.024(2) 0.021(2) 0.004(2) 0.0001(19) 0.004(2)
 C00A 0.035(3) 0.023(2) 0.027(2) -0.002(2) -0.001(2) 0.003(2)
 C00B 0.031(3) 0.026(2) 0.028(3) 0.005(2) 0.003(2) 0.002(2)
 C00C 0.034(3) 0.026(2) 0.025(2) -0.003(2) 0.000(2) 0.007(2)
 C00D 0.029(3) 0.020(2) 0.024(2) 0.002(2) 0.006(2) 0.0004(19)
 C00E 0.038(3) 0.023(2) 0.025(2) -0.002(2) 0.001(2) 0.003(2)
 C00F 0.032(3) 0.033(3) 0.032(3) -0.001(2) 0.004(2) -0.001(2)
 C00G 0.033(3) 0.040(3) 0.026(3) 0.002(2) 0.001(2) 0.010(2)
 C00H 0.035(3) 0.030(3) 0.051(3) -0.004(3) 0.004(2) 0.000(2)
 C00I 0.041(3) 0.033(3) 0.033(3) -0.007(2) 0.006(2) 0.010(2)
 C00J 0.024(2) 0.042(3) 0.032(3) 0.000(2) -0.001(2) -0.005(2)
 C00K 0.035(3) 0.041(3) 0.075(4) -0.002(3) 0.004(3) -0.011(3)
 C00L 0.034(3) 0.049(3) 0.070(4) -0.010(3) 0.018(3) 0.001(3)
 C00M 0.031(3) 0.061(4) 0.090(5) -0.002(4) 0.016(3) -0.005(3)

_geom_special_details
;
 All esds (except the esd in the dihedral angle between two l.s. planes) 
 are estimated using the full covariance matrix.  The cell esds are taken 
 into account individually in the estimation of esds in distances, angles 
 and torsion angles; correlations between esds in cell parameters are only 
 used when they are defined by crystal symmetry.  An approximate (isotropic) 
 treatment of cell esds is used for estimating esds involving l.s. planes. 
;
loop_
  _geom_bond_atom_site_label_1
  _geom_bond_atom_site_label_2
  _geom_bond_distance
  _geom_bond_site_symmetry_2
  _geom_bond_publ_flag
 Cu1 Cl2 2.2479(11) . ?
 Cu1 O1 1.959(3) . ?
 Cu1 N1 1.944(3) . ?
 Cu1 N2 2.076(3) . ?
 Cl1 C00G 1.749(4) . ?
 O1 C009 1.309(5) . ?
 N1 C008 1.276(5) . ?
 N1 C00D 1.399(5) . ?
 N2 C007 1.332(5) . ?
 N2 C00B 1.378(5) . ?
 C007 C008 1.450(5) . ?
 C007 C00A 1.402(5) . ?
 C008 H008 0.9300 . ?
 C009 C00C 1.412(5) . ?
 C009 C00D 1.421(6) . ?
 C00A H00A 0.9300 . ?
 C00A C00I 1.363(6) . ?
 C00B C00F 1.416(5) . ?
 C00B C00H 1.409(6) . ?
 C00C H00C 0.9300 . ?
 C00C C00G 1.361(6) . ?
 C00D C00E 1.385(5) . ?
 C00E H00E 0.9300 . ?
 C00E C00J 1.378(5) . ?
 C00F C00I 1.391(6) . ?
 C00F C00L 1.398(6) . ?
 C00G C00J 1.397(6) . ?
 C00H H00H 0.9300 . ?
 C00H C00K 1.362(6) . ?
 C00I H00I 0.9300 . ?
 C00J H00J 0.9300 . ?
 C00K H00K 0.9300 . ?
 C00K C00M 1.397(6) . ?
 C00L H00L 0.9300 . ?
 C00L C00M 1.360(7) . ?
 C00M H00M 0.9300 . ?

loop_
  _geom_angle_atom_site_label_1
  _geom_angle_atom_site_label_2
  _geom_angle_atom_site_label_3
  _geom_angle
  _geom_angle_site_symmetry_1
  _geom_angle_site_symmetry_3
  _geom_angle_publ_flag
 O1 Cu1 Cl2 97.10(9) . . ?
 O1 Cu1 N2 162.74(12) . . ?
 N1 Cu1 Cl2 148.78(10) . . ?
 N1 Cu1 O1 83.90(12) . . ?
 N1 Cu1 N2 79.82(13) . . ?
 N2 Cu1 Cl2 99.79(9) . . ?
 C009 O1 Cu1 110.9(2) . . ?
 C008 N1 Cu1 116.9(3) . . ?
 C008 N1 C00D 130.0(4) . . ?
 C00D N1 Cu1 112.9(3) . . ?
 C007 N2 Cu1 111.0(3) . . ?
 C007 N2 C00B 118.3(3) . . ?
 C00B N2 Cu1 130.7(3) . . ?
 N2 C007 C008 115.0(4) . . ?
 N2 C007 C00A 123.7(4) . . ?
 C00A C007 C008 121.3(4) . . ?
 N1 C008 C007 116.4(4) . . ?
 N1 C008 H008 121.8 . . ?
 C007 C008 H008 121.8 . . ?
 O1 C009 C00C 122.8(4) . . ?
 O1 C009 C00D 120.8(4) . . ?
 C00C C009 C00D 116.4(4) . . ?
 C007 C00A H00A 121.0 . . ?
 C00I C00A C007 118.0(4) . . ?
 C00I C00A H00A 121.0 . . ?
 N2 C00B C00F 120.6(4) . . ?
 N2 C00B C00H 120.0(4) . . ?
 C00H C00B C00F 119.3(4) . . ?
 C009 C00C H00C 120.3 . . ?
 C00G C00C C009 119.3(4) . . ?
 C00G C00C H00C 120.3 . . ?
 N1 C00D C009 111.5(4) . . ?
 C00E C00D N1 126.1(4) . . ?
 C00E C00D C009 122.4(4) . . ?
 C00D C00E H00E 119.9 . . ?
 C00J C00E C00D 120.3(4) . . ?
 C00J C00E H00E 119.9 . . ?
 C00I C00F C00B 118.4(4) . . ?
 C00I C00F C00L 122.6(4) . . ?
 C00L C00F C00B 118.8(4) . . ?
 C00C C00G Cl1 118.7(3) . . ?
 C00C C00G C00J 124.4(4) . . ?
 C00J C00G Cl1 116.9(4) . . ?
 C00B C00H H00H 120.2 . . ?
 C00K C00H C00B 119.6(4) . . ?
 C00K C00H H00H 120.2 . . ?
 C00A C00I C00F 120.9(4) . . ?
 C00A C00I H00I 119.6 . . ?
 C00F C00I H00I 119.6 . . ?
 C00E C00J C00G 117.1(4) . . ?
 C00E C00J H00J 121.5 . . ?
 C00G C00J H00J 121.5 . . ?
 C00H C00K H00K 119.3 . . ?
 C00H C00K C00M 121.3(5) . . ?
 C00M C00K H00K 119.3 . . ?
 C00F C00L H00L 119.4 . . ?
 C00M C00L C00F 121.1(5) . . ?
 C00M C00L H00L 119.4 . . ?
 C00K C00M H00M 120.1 . . ?
 C00L C00M C00K 119.8(5) . . ?
 C00L C00M H00M 120.1 . . ?

loop_
  _geom_torsion_atom_site_label_1
  _geom_torsion_atom_site_label_2
  _geom_torsion_atom_site_label_3
  _geom_torsion_atom_site_label_4
  _geom_torsion
  _geom_torsion_site_symmetry_1
  _geom_torsion_site_symmetry_2
  _geom_torsion_site_symmetry_3
  _geom_torsion_site_symmetry_4
  _geom_torsion_publ_flag
 Cu1 O1 C009 C00C -179.7(3) . . . . ?
 Cu1 O1 C009 C00D 0.3(5) . . . . ?
 Cu1 N1 C008 C007 6.5(5) . . . . ?
 Cu1 N1 C00D C009 -3.0(4) . . . . ?
 Cu1 N1 C00D C00E 175.5(3) . . . . ?
 Cu1 N2 C007 C008 -7.1(4) . . . . ?
 Cu1 N2 C007 C00A 174.5(3) . . . . ?
 Cu1 N2 C00B C00F -172.6(3) . . . . ?
 Cu1 N2 C00B C00H 9.5(6) . . . . ?
 Cl2 Cu1 O1 C009 147.0(3) . . . . ?
 Cl2 Cu1 N1 C008 84.2(3) . . . . ?
 Cl2 Cu1 N1 C00D -91.1(3) . . . . ?
 Cl2 Cu1 N2 C007 -140.3(3) . . . . ?
 Cl2 Cu1 N2 C00B 37.4(4) . . . . ?
 Cl1 C00G C00J C00E -176.6(3) . . . . ?
 O1 Cu1 N1 C008 177.8(3) . . . . ?
 O1 Cu1 N1 C00D 2.6(3) . . . . ?
 O1 Cu1 N2 C007 27.7(6) . . . . ?
 O1 Cu1 N2 C00B -154.6(4) . . . . ?
 O1 C009 C00C C00G 177.3(4) . . . . ?
 O1 C009 C00D N1 1.8(5) . . . . ?
 O1 C009 C00D C00E -176.7(4) . . . . ?
 N1 Cu1 O1 C009 -1.6(3) . . . . ?
 N1 Cu1 N2 C007 8.0(3) . . . . ?
 N1 Cu1 N2 C00B -174.3(4) . . . . ?
 N1 C00D C00E C00J -179.6(4) . . . . ?
 N2 Cu1 O1 C009 -21.0(6) . . . . ?
 N2 Cu1 N1 C008 -8.0(3) . . . . ?
 N2 Cu1 N1 C00D 176.8(3) . . . . ?
 N2 C007 C008 N1 0.9(5) . . . . ?
 N2 C007 C00A C00I 0.3(6) . . . . ?
 N2 C00B C00F C00I -3.4(6) . . . . ?
 N2 C00B C00F C00L -178.8(4) . . . . ?
 N2 C00B C00H C00K 179.0(4) . . . . ?
 C007 N2 C00B C00F 4.9(6) . . . . ?
 C007 N2 C00B C00H -173.0(4) . . . . ?
 C007 C00A C00I C00F 1.3(6) . . . . ?
 C008 N1 C00D C009 -177.5(4) . . . . ?
 C008 N1 C00D C00E 1.0(7) . . . . ?
 C008 C007 C00A C00I -178.0(4) . . . . ?
 C009 C00C C00G Cl1 178.6(3) . . . . ?
 C009 C00C C00G C00J 0.3(7) . . . . ?
 C009 C00D C00E C00J -1.3(7) . . . . ?
 C00A C007 C008 N1 179.4(4) . . . . ?
 C00B N2 C007 C008 174.9(3) . . . . ?
 C00B N2 C007 C00A -3.5(6) . . . . ?
 C00B C00F C00I C00A 0.2(7) . . . . ?
 C00B C00F C00L C00M -0.6(8) . . . . ?
 C00B C00H C00K C00M 0.2(8) . . . . ?
 C00C C009 C00D N1 -178.2(3) . . . . ?
 C00C C009 C00D C00E 3.2(6) . . . . ?
 C00C C00G C00J C00E 1.7(7) . . . . ?
 C00D N1 C008 C007 -179.2(4) . . . . ?
 C00D C009 C00C C00G -2.7(6) . . . . ?
 C00D C00E C00J C00G -1.2(6) . . . . ?
 C00F C00B C00H C00K 1.0(7) . . . . ?
 C00F C00L C00M C00K 1.7(9) . . . . ?
 C00H C00B C00F C00I 174.6(4) . . . . ?
 C00H C00B C00F C00L -0.8(7) . . . . ?
 C00H C00K C00M C00L -1.5(9) . . . . ?
 C00I C00F C00L C00M -175.8(5) . . . . ?
 C00L C00F C00I C00A 175.4(4) . . . . ?

loop_
  _diffrn_refln_index_h
  _diffrn_refln_index_k
  _diffrn_refln_index_l
  _diffrn_refln_intensity_net
  _diffrn_refln_intensity_u
 -3 0 0 257.2 15.34
 3 0 0 227.87 11.24
 -3 0 0 257.03 11.42
 3 0 0 260.89 15.8
 4 0 0 700.1 29.69
 -4 0 0 693.03 21.42
 -4 0 0 655.52 28.22
 4 0 0 677.9 22.21
 -5 0 0 14.65 3.54
 5 0 0 23.9 7.14
 -6 0 0 1396.31 37.66
 6 0 0 1436.35 51.66
 7 0 0 147.39 18.53
 -7 0 0 150.64 13.15
 8 0 0 7.8 5.4
 -8 0 0 4.25 3.44
 9 0 0 894.39 50.72
 -9 0 0 955.02 38.16
 -10 0 0 8.81 5.31
 10 0 0 15.79 9.35
 11 0 0 529.28 43.81
 -11 0 0 465.16 30.03
 12 0 0 464.96 43.38
 -12 0 0 480.26 31.36
 -13 0 0 9.35 6.47
 13 0 0 1.92 6.04
 14 0 0 12.23 9.07
 -14 0 0 13.51 7.43
 14 0 0 29.26 10.33
 15 0 0 175.42 24.23
 -15 0 0 190.35 22.56
 15 0 0 156.9 29.19
 16 0 0 133.35 28.37
 -16 0 0 140.78 20.3
 17 0 0 105.1 26.82
 -17 0 0 120.68 19.34
 2 1 0 850.88 14.14
 -2 1 0 897.92 17.71
 3 -1 0 893.86 27.67
 3 -1 0 876.81 23.96
 -3 -1 0 897.52 18.58
 3 1 0 865.53 18.96
 -3 1 0 899.53 27.07
 -3 1 0 884.21 23.52
 -3 -1 0 937.06 29.64
 3 1 0 939.61 30.14
 3 -1 0 871.02 21.37
 -4 1 0 836.31 25.55
 4 1 0 795.26 32.11
 -4 -1 0 755.55 20.67
 4 -1 0 862.43 32.02
 4 1 0 786.88 21.85
 4 -1 0 838.16 26.41
 -4 -1 0 801.84 31.67
 5 -1 0 253.71 19.74
 5 1 0 245.6 13.84
 -5 1 0 244.27 15.37
 -5 -1 0 254.11 13.52
 5 1 0 238.09 19.62
 -6 1 0 75.1 9.35
 6 1 0 86.51 13.48
 -6 -1 0 71.4 8.31
 6 -1 0 69.5 12.03
 7 -1 0 174.29 19.8
 -7 1 0 160.16 14.72
 7 1 0 163.77 19.58
 -7 -1 0 160.99 13.27
 -8 -1 0 3.09 3.1
 8 1 0 7.3 5.51
 8 -1 0 6.18 6.45
 -8 1 0 -0.59 3.57
 9 1 0 8.66 5.87
 9 -1 0 1.56 4.74
 -9 1 0 3.98 3.94
 -9 -1 0 0.63 3.01
 -10 -1 0 8.9 5.66
 10 -1 0 2.45 4.83
 -10 1 0 3.68 4.23
 10 1 0 1.37 4.85
 10 -1 0 7.45 5.45
 11 -1 0 346.26 35.29
 -11 1 0 370.83 27.6
 11 -1 0 412.48 30.14
 -11 -1 0 419.75 27.16
 11 1 0 393.17 38.05
 -12 -1 0 84.61 13.56
 12 -1 0 70.63 17.26
 12 1 0 106.26 21.1
 12 -1 0 96.77 15.74
 -12 1 0 89.21 14.87
 13 -1 0 223.43 32.16
 -13 -1 0 207.34 21.32
 13 -1 0 224.84 24.55
 13 1 0 250.57 33.54
 -13 1 0 217.29 22.95
 14 1 0 48.62 17.14
 14 -1 0 84.16 16.17
 -14 -1 0 67.43 13.18
 -14 1 0 60.56 12.97
 14 -1 0 69.33 18.84
 15 1 0 66.05 18.87
 -15 1 0 74.38 15.09
 -15 -1 0 62.13 13.25
 15 -1 0 62.55 14.3
 15 -1 0 73.83 20.25
 -16 -1 0 66.96 13.51
 -16 1 0 50.37 13.1
 16 -1 0 49.37 17.15
 16 1 0 66.12 16.1
 17 -1 0 21.06 13.89
 -17 1 0 17.55 8.78
 18 -1 0 19.41 13.74
 -18 1 0 29.7 11.42
 -1 2 0 377.26 12.31
 -1 2 0 363.57 12.95
 -2 2 0 986.49 23.79
 2 -2 0 1061.05 25.61
 -2 2 0 1013.76 24.78
 2 -2 0 1032.92 24.94
 3 -2 0 279.64 15.79
 3 -2 0 295.41 15.32
 -3 2 0 281.77 12.49
 -3 -2 0 281.6 16.83
 -3 -2 0 270.1 8.2
 -3 2 0 330.74 15.9
 -3 2 0 280.81 15.22
 4 -2 0 463.57 23.18
 -4 -2 0 445.46 13.9
 4 -2 0 480.11 18.63
 -4 2 0 482.16 21.06
 4 2 0 436.08 14.34
 5 -2 0 30.77 5.5
 5 2 0 25.29 4.08
 -5 2 0 26.6 5
 5 -2 0 34.26 7.24
 -5 -2 0 25.93 3.9
 6 -2 0 923.98 31.67
 6 -2 0 983.81 42.83
 -6 2 0 970.36 34.92
 6 2 0 988.36 43.84
 -6 -2 0 942.28 26.8
 7 2 0 748.81 41.28
 -7 2 0 762.37 33.14
 -7 -2 0 749.84 26.45
 7 -2 0 668.87 29.4
 7 -2 0 740.11 40.26
 8 -2 0 282.43 27.06
 -8 -2 0 300.18 17.99
 8 -2 0 275.83 20.33
 -8 2 0 269.84 20.55
 8 2 0 245.2 25.56
 -9 -2 0 633.32 28.25
 9 -2 0 523.05 29.87
 -9 2 0 649.75 33.89
 9 -2 0 585.77 41.81
 9 2 0 578.63 41.4
 -10 2 0 66.83 12.48
 10 -2 0 82.14 17.33
 -10 -2 0 83.27 11.08
 10 2 0 69.32 15.62
 10 -2 0 81.91 13.25
 11 2 0 443.77 40.37
 -11 -2 0 443.83 26.97
 11 -2 0 482.5 42.18
 -11 2 0 485.71 32
 11 -2 0 475.12 31.76
 12 -2 0 239.88 31.42
 -12 -2 0 275.43 22.48
 12 -2 0 269.73 25.11
 -12 2 0 313.55 27.38
 13 -2 0 4.28 4.73
 13 -2 0 0.62 4.29
 -13 2 0 6.86 6.38
 -13 -2 0 -1.28 3.62
 14 -2 0 -2.73 3.94
 14 -2 0 5.89 7.73
 -14 -2 0 9.12 7.06
 -14 2 0 -0.47 5.74
 -15 -2 0 131.98 17.72
 -15 2 0 158.86 21.72
 15 -2 0 150.35 28.6
 16 -2 0 66.63 21.07
 -16 2 0 79.2 16.46
 -17 2 0 65.43 15.25
 17 -2 0 67.54 21.3
 -18 2 0 94.03 19.09
 0 3 0 -1.58 2.13
 0 -3 0 1.02 1.34
 0 3 0 0.06 1.26
 0 -3 0 0.29 1.31
 -1 3 0 9.32 2.11
 -1 -3 0 12.19 2.77
 1 3 0 8.46 2.04
 1 -3 0 20.17 3.97
 -1 3 0 12.63 2.91
 1 -3 0 9.96 2.86
 -2 -3 0 574.63 17.34
 -2 3 0 537.11 19.28
 2 3 0 571.14 17.2
 -2 3 0 557.04 20.35
 2 -3 0 581.69 20.77
 2 -3 0 549.68 20.02
 -3 3 0 -0.86 2.51
 -3 -3 0 11.36 4.36
 3 -3 0 5.8 2.4
 -4 -3 0 765.41 14.67
 4 -3 0 747.39 29.79
 -4 3 0 759.43 27.58
 -4 3 0 784.94 24.47
 -5 -3 0 208.64 9.66
 -5 3 0 227.95 14.34
 5 -3 0 212.94 17.8
 -5 3 0 226.88 16.31
 6 -3 0 14.95 6.41
 6 -3 0 5.92 2.96
 -6 3 0 7.99 3.68
 -6 -3 0 11.43 3.15
 -7 3 0 293.06 21.34
 -7 -3 0 254.44 14.18
 7 -3 0 250.42 23.37
 7 -3 0 264.28 18.5
 -8 3 0 -0.19 4.72
 -8 -3 0 4.53 4
 8 -3 0 -0.61 3.22
 8 -3 0 1.14 2.93
 9 -3 0 1.89 5.4
 9 -3 0 -0.72 2.84
 -9 3 0 -2.59 4.44
 -9 -3 0 8.15 4.7
 -10 3 0 21.57 7.68
 -10 -3 0 28.44 7.33
 10 -3 0 48.25 10.54
 10 -3 0 30.97 11.4
 11 -3 0 95.74 14.66
 11 -3 0 130.77 22.51
 -11 -3 0 67.77 10.49
 -11 3 0 94.09 15.74
 -12 -3 0 11.85 5.76
 -12 3 0 7.32 6.44
 12 -3 0 5.92 5.08
 12 -3 0 18.87 10.08
 13 -3 0 35.67 13.94
 -13 -3 0 44.66 9.36
 13 -3 0 32.45 8.89
 -13 3 0 55.89 13.04
 -14 -3 0 74.96 12.5
 -14 3 0 61.56 13.86
 14 -3 0 71.11 13.87
 14 -3 0 66.35 19.14
 -15 3 0 21.71 11.09
 15 -3 0 2.03 5.29
 16 -3 0 11.05 9.64
 -16 3 0 9.08 6.42
 -17 3 0 24.71 11.78
 17 -3 0 17.47 11.79
 -18 3 0 23.19 11.16
 0 4 0 259.62 10.91
 0 -4 0 258.41 14.37
 0 -4 0 264.75 11.43
 0 4 0 273.2 15.01
 1 4 0 190.51 10.78
 1 -4 0 173.73 10.83
 -1 4 0 172.56 12.14
 1 -4 0 200.65 12.95
 -1 4 0 170.87 10.36
 -1 -4 0 175.24 11.86
 -1 -4 0 184.62 7.66
 1 4 0 182.01 11.79
 1 4 0 202.32 7.33
 2 -4 0 147.77 11.24
 -2 4 0 130.54 10.26
 -2 -4 0 145.48 9.8
 2 -4 0 143.8 11.67
 2 4 0 147.32 9.91
 -2 -4 0 149.58 11.12
 -3 -4 0 347.34 16.1
 -3 4 0 301.73 17.05
 3 -4 0 344.42 19.13
 4 -4 0 13 4.44
 -4 4 0 12.75 3.47
 -4 4 0 12.8 3.1
 -4 -4 0 20.22 4.92
 5 -4 0 167.78 16.19
 -5 -4 0 178.95 7.36
 -5 4 0 185.99 15.46
 -5 4 0 190.85 13.72
 6 -4 0 70.05 11.71
 -6 4 0 73.92 10.49
 -6 -4 0 67.29 5.65
 -7 -4 0 465.28 17.07
 -7 4 0 521.5 29.82
 7 -4 0 540.85 34.01
 -8 4 0 220.6 20.49
 -8 -4 0 195.32 12.59
 8 -4 0 213.68 23.45
 9 -4 0 202.44 24.16
 -9 4 0 219.23 20.8
 -9 -4 0 221.62 14.71
 -10 4 0 3.39 8.5
 10 -4 0 9.9 5.58
 -10 -4 0 8.27 4.44
 10 -4 0 17.18 10.51
 -11 4 0 49 11.87
 11 -4 0 41.32 12.02
 -11 -4 0 51.51 8.97
 11 -4 0 25.71 7.36
 -12 -4 0 5.55 5.08
 12 -4 0 -1.26 5.26
 12 -4 0 3.56 3.56
 -12 4 0 4.5 5.54
 -13 4 0 40.02 11.91
 13 -4 0 21.77 10.53
 13 -4 0 11.93 5.63
 14 -4 0 3.75 6.25
 -14 4 0 7.98 6.27
 15 -4 0 23.49 11.34
 -15 4 0 43.01 12.93
 16 -4 0 18.24 11.04
 -16 4 0 17.56 8.66
 17 -4 0 1.22 9.33
 -17 4 0 14.9 9.26
 -18 4 0 16.98 9.72
 0 5 0 0.2 1.73
 0 -5 0 -0.79 1.67
 0 -5 0 1.42 1.57
 1 5 0 573.85 14.45
 -1 5 0 558.55 20.21
 1 5 0 522.42 19.97
 1 -5 0 523.03 20.52
 -1 -5 0 573.87 15.9
 1 -5 0 553.77 24.5
 -1 -5 0 549.53 23.47
 2 -5 0 632.93 26.33
 -2 5 0 624.91 24.09
 2 5 0 609.75 21.7
 -2 -5 0 637.75 25.47
 3 -5 0 1.56 2.18
 -3 5 0 -5.05 4.96
 -3 -5 0 0.11 2.55
 -4 5 0 164.74 14.29
 -4 -5 0 164.81 12.93
 4 -5 0 179.31 15.98
 5 -5 0 4.11 3.12
 -5 -5 0 6.12 4.48
 -5 5 0 0.49 4.73
 -6 5 0 0.96 5.34
 6 -5 0 4.67 4.42
 -6 -5 0 1.79 1.05
 -6 -5 0 5.11 4.5
 -7 -5 0 4.21 2.06
 7 -5 0 3.94 3.69
 -7 5 0 3.48 4.97
 -8 -5 0 11.91 3.49
 -8 5 0 13.14 5.9
 8 -5 0 14.25 6.19
 -9 -5 0 57.74 6.96
 9 -5 0 67.1 14.77
 -9 5 0 62.16 12.5
 10 -5 0 26.25 11.37
 -10 -5 0 25.66 5.49
 11 -5 0 21.12 12.13
 -11 5 0 24.98 9.47
 -11 -5 0 27.62 6.41
 12 -5 0 4.58 6.51
 -12 5 0 -4.63 6.48
 -13 5 0 17.66 9.12
 13 -5 0 31.06 13.85
 -14 5 0 27.91 10.91
 14 -5 0 2.95 6.3
 -15 5 0 37.31 12.27
 15 -5 0 16.15 8.9
 -16 5 0 7.92 7.62
 16 -5 0 2.93 6.81
 -17 5 0 12.08 8.05
 17 -5 0 14.45 11.03
 -18 5 0 6.29 8.18
 0 6 0 143.56 9.89
 0 -6 0 161.41 14.06
 0 -6 0 137.43 10.12
 1 -6 0 3.75 3.48
 -1 6 0 -0.21 2.49
 -1 -6 0 2.08 2.32
 -1 -6 0 -0.39 1.68
 1 6 0 4.67 2.19
 2 6 0 12.22 2.15
 -2 6 0 9.51 3.21
 2 -6 0 12.76 4.56
 -2 -6 0 12.79 4.28
 3 -6 0 4.07 3.78
 -3 6 0 2.43 3.46
 -3 -6 0 3.41 2.96
 -3 -6 0 2.79 2.63
 -4 6 0 453.66 25.27
 -4 -6 0 459.82 22.83
 4 -6 0 491.76 27.7
 5 -6 0 206.52 19.27
 -5 6 0 185.47 17.3
 -5 -6 0 185.04 15.23
 6 -6 0 53.32 10.92
 -6 -6 0 55.31 9.27
 -6 6 0 39.71 8.56
 7 -6 0 50.42 11.17
 -7 6 0 59.94 10.3
 -7 -6 0 73.19 11.32
 8 -6 0 83.05 15.15
 -8 -6 0 76.88 5.74
 -8 6 0 75.92 5.22
 -8 6 0 79.05 13.25
 -8 -6 0 93.3 13.16
 -9 6 0 6.87 4.59
 9 -6 0 6.45 5.7
 -9 -6 0 7.1 2.47
 -10 -6 0 48.3 6.23
 -10 6 0 58.78 13.83
 10 -6 0 33.58 11.81
 11 -6 0 24.4 10.02
 -11 6 0 39.99 11.98
 -12 6 0 14.27 7.1
 12 -6 0 9.2 8.3
 13 -6 0 -3.21 5.82
 -13 6 0 9.92 8.97
 14 -6 0 -3.55 7.37
 -14 6 0 5.73 7.47
 -15 6 0 26.06 11.14
 15 -6 0 9.87 8.26
 16 -6 0 27.93 15.69
 -16 6 0 30.72 11.86
 17 -6 0 37.67 15.49
 -17 6 0 27.47 10.48
 0 7 0 7.26 2.97
 0 -7 0 36.47 8.36
 -1 7 0 103.04 10.06
 -1 -7 0 121.08 13.22
 1 -7 0 114.62 13.02
 1 7 0 116.14 8.34
 -2 7 0 676.91 27.79
 2 -7 0 631.83 31.01
 -2 -7 0 608.16 29.3
 2 7 0 662.12 15.86
 -3 7 0 991.79 36.43
 3 -7 0 1038.38 41.31
 -3 -7 0 1019.65 38.61
 -4 -7 0 1528.61 48.87
 -4 -7 0 1504.35 43.22
 -4 7 0 1470.97 46.94
 4 -7 0 1477.57 50.93
 -5 7 0 145.24 15.93
 5 -7 0 151.58 17.13
 -5 -7 0 152.69 14.5
 6 -7 0 1.2 2.74
 -6 -7 0 14.89 5.83
 -6 7 0 6.12 5.17
 -7 -7 0 35.76 8.4
 7 -7 0 26.98 9.42
 -7 7 0 21.81 7.62
 8 -7 0 -1.45 3.41
 -8 7 0 0.68 4.76
 -8 -7 0 10.66 6.38
 -9 -7 0 12.77 7.37
 9 -7 0 2.8 4.72
 -9 7 0 0.27 5.26
 10 -7 0 36.85 11.37
 -10 -7 0 40.54 10.38
 -10 7 0 43.15 12.33
 -11 7 0 184.26 23.42
 -11 -7 0 229.1 24.25
 11 -7 0 191.13 27.72
 -12 7 0 4.3 7.03
 -12 -7 0 6.34 7.36
 12 -7 0 4.6 6.16
 13 -7 0 69.98 19.65
 -13 7 0 103.04 18.89
 -13 -7 0 126.12 19.65
 -14 7 0 110.4 20.7
 14 -7 0 96.73 23.29
 15 -7 0 12.13 11.33
 -15 7 0 47.98 13.95
 -16 7 0 54.92 15.55
 16 -7 0 36.16 16.91
 -16 -7 0 35.68 12.44
 -17 -7 0 12.5 9.28
 0 8 0 1439.05 35.18
 0 -8 0 1412.31 48.26
 1 -8 0 60.51 10.34
 -1 -8 0 55.83 9.63
 1 8 0 70.22 7.43
 -1 8 0 57.13 8.21
 2 -8 0 16.43 5.51
 -2 8 0 16.75 5.89
 -2 -8 0 11.8 4.15
 2 8 0 19.15 3.27
 -3 8 0 139.67 14.47
 3 -8 0 114.08 14.6
 -3 -8 0 148.89 15.86
 -4 -8 0 304.95 23.25
 4 -8 0 292.71 23.68
 -4 8 0 269.29 21.3
 -5 8 0 28.88 8.44
 -5 -8 0 22.1 6.34
 5 -8 0 28.75 8.24
 -5 -8 0 25.05 6.57
 6 -8 0 139.25 18.21
 -6 8 0 135.2 16.89
 -6 -8 0 136.58 14.98
 -7 8 0 5.65 6.25
 -7 -8 0 12.73 5.71
 7 -8 0 18.08 8.84
 -8 8 0 12.13 6.93
 -8 -8 0 22.67 8
 8 -8 0 9.23 5.77
 -9 -8 0 335.27 26.8
 9 -8 0 320.96 32.29
 -9 8 0 337.7 29.72
 -10 8 0 30.11 10.32
 10 -8 0 29.39 10.2
 -10 -8 0 43.94 11.08
 11 -8 0 86.8 20.01
 -11 -8 0 72.41 14.75
 -11 8 0 63.69 14.89
 -12 8 0 107.33 18.99
 -12 -8 0 91.94 16.34
 12 -8 0 94.62 21.11
 13 -8 0 6.38 6.64
 -13 -8 0 5.98 6.21
 -13 8 0 12.97 9.58
 -14 -8 0 7.93 7.15
 -14 8 0 3.29 5.05
 14 -8 0 -3.17 4.97
 -15 8 0 122.54 21.83
 -15 -8 0 103.23 19.48
 15 -8 0 111.88 26.21
 -16 -8 0 29.18 11.4
 16 -8 0 26.12 14.34
 -16 8 0 42.47 14.91
 -17 -8 0 48.15 14.44
 0 9 0 3.6 3.69
 0 -9 0 7.93 4.68
 -1 9 0 31.74 7.02
 -1 -9 0 35.45 7.97
 1 -9 0 27.97 7.88
 1 9 0 35.25 5.83
 -2 9 0 684.92 30.47
 2 -9 0 715.45 36.98
 -2 -9 0 638.02 34.45
 2 9 0 647.24 19.27
 -3 9 0 174.74 17.24
 3 -9 0 167.1 18.53
 -3 -9 0 170 17.84
 -4 -9 0 450.89 30.05
 -4 9 0 461.44 28.74
 4 -9 0 467.87 31.61
 -5 -9 0 284.87 24.76
 5 -9 0 292.35 26.27
 -5 9 0 278.23 23.7
 6 -9 0 190.99 22.49
 -6 9 0 177.44 20.01
 -6 -9 0 183.26 17.91
 -6 -9 0 173.08 19.58
 -7 9 0 251.23 24.82
 7 -9 0 239.13 26.32
 -7 -9 0 226.57 20.83
 8 -9 0 2.59 4.38
 -8 9 0 8.69 8.38
 -8 -9 0 1.84 3.71
 9 -9 0 6.51 7.88
 -9 -9 0 5.24 5.06
 -9 9 0 13.95 7.23
 -10 -9 0 29.23 9.3
 10 -9 0 27.22 10.96
 -10 9 0 31.52 10.54
 -11 -9 0 322.18 29.29
 -11 9 0 275.18 29.42
 11 -9 0 269.05 34.53
 -12 -9 0 233.85 26.34
 12 -9 0 191.26 29.95
 -12 9 0 196.92 26.15
 -13 -9 0 199.59 25.22
 13 -9 0 188.29 32.2
 -13 9 0 183.65 25.98
 -14 -9 0 66.45 15.27
 -14 9 0 100.37 19.97
 14 -9 0 75.05 21.6
 -15 -9 0 56.26 14.86
 15 -9 0 45.16 18.12
 -15 9 0 55.06 15.62
 -16 -9 0 38.85 12.75
 0 10 0 817.57 29.85
 0 -10 0 846.58 42.74
 1 -10 0 196.51 20.42
 1 10 0 266.61 15.83
 -1 10 0 198.41 16.22
 2 10 0 336.23 15.07
 -2 10 0 320.77 22.15
 2 -10 0 363.21 27.85
 -2 -10 0 302.89 24.97
 3 -10 0 141.92 17.96
 -3 -10 0 136.38 17.21
 -3 10 0 154.29 16.53
 -4 -10 0 9.47 5.15
 -4 10 0 12.7 7.34
 4 -10 0 11.25 6.46
 -5 -10 0 3.66 2.83
 -5 10 0 -3.42 4.5
 5 -10 0 3.77 3.32
 -6 10 0 159.85 19.66
 -6 -10 0 174.4 20.96
 6 -10 0 184.71 22.66
 7 -10 0 72.08 14.75
 -7 -10 0 77.37 12.6
 -7 10 0 83.57 15.25
 -7 -10 0 93.65 16.01
 -8 -10 0 33.6 8.09
 -8 10 0 56.45 14.15
 8 -10 0 60.08 14.42
 9 -10 0 294.6 32.86
 -9 10 0 354.61 32.23
 -9 -10 0 323.45 27.73
 -10 10 0 143.87 21.57
 -10 -10 0 104.11 16.54
 10 -10 0 149.23 24.35
 11 -10 0 94.25 20.95
 -11 10 0 109.24 19.9
 -11 -10 0 109.93 17.88
 -12 -10 0 12.03 6.59
 12 -10 0 2.95 5.32
 -12 10 0 29.04 10.71
 13 -10 0 22.76 11.42
 -13 -10 0 20.07 9.26
 -13 10 0 31.28 13.46
 -14 -10 0 2.34 6.17
 -14 10 0 12.95 9.83
 14 -10 0 -1.08 6.9
 -15 -10 0 44.93 13.82
 15 -10 0 45.01 17.77
 -15 10 0 57.59 16.06
 0 -11 0 0.4 4.17
 0 11 0 10.43 5.3
 -1 -11 0 28.54 7.85
 -1 11 0 41.65 8.61
 1 11 0 40.01 7.2
 1 -11 0 37.04 9.68
 2 11 0 146.85 10.87
 -2 11 0 144.65 15.78
 2 -11 0 148.3 18.84
 -2 -11 0 157.96 19.1
 -3 -11 0 38.6 9.6
 3 -11 0 38.75 10.63
 -3 11 0 48.24 9.93
 4 -11 0 441.57 34.14
 -4 -11 0 421.8 31.93
 -4 11 0 446.26 30.37
 5 -11 0 673.76 43.26
 -5 11 0 664.46 38.86
 -5 -11 0 636.93 40.31
 6 -11 0 306 30.12
 -6 -11 0 281.48 27.64
 -6 11 0 273.89 26.39
 7 -11 0 544.44 41.97
 -7 -11 0 495.36 37.5
 -7 11 0 439.36 34.36
 -8 11 0 8.98 7.77
 -8 -11 0 9.49 4.6
 8 -11 0 22.5 9.92
 -8 -11 0 9.2 4.92
 -9 -11 0 35.95 11.5
 -9 11 0 37.22 11.46
 -9 -11 0 32.71 9.6
 9 -11 0 24.59 10.21
 -10 11 0 179.15 24.81
 10 -11 0 122.43 23.3
 -10 -11 0 148.31 20.04
 -11 11 0 263.5 30.72
 11 -11 0 260.36 34.97
 -11 -11 0 300.47 29.62
 12 -11 0 41.56 15.39
 -12 -11 0 45.08 12.43
 -12 11 0 69.99 16.62
 -13 11 0 144.92 24.5
 13 -11 0 114.23 25.41
 -13 -11 0 123.49 20.73
 -14 11 0 45.65 15.77
 14 -11 0 15.93 9.38
 0 12 0 588.37 27.48
 0 -12 0 558.13 37.72
 1 12 0 137.1 13.98
 -1 -12 0 154.9 21.99
 1 -12 0 72.27 13.9
 -1 12 0 99.62 13
 -2 -12 0 139.16 19.16
 -2 12 0 156.91 16.96
 2 12 0 131.03 10.7
 2 -12 0 127.09 18.33
 -3 12 0 62.03 11.85
 3 -12 0 51.3 12.48
 -3 -12 0 46.51 11.2
 4 -12 0 1.71 4.59
 -4 -12 0 1.27 4.44
 -5 12 0 19.47 8.41
 -5 -12 0 29.47 9.48
 5 -12 0 40.6 11.27
 -6 -12 0 83.13 15.78
 -6 12 0 66.71 14.1
 6 -12 0 73.2 14.82
 7 -12 0 125.02 20.79
 -7 12 0 150.91 21.47
 -7 -12 0 128.29 19.94
 -8 -12 0 79.5 16.26
 8 -12 0 88.17 18.45
 -8 12 0 64.51 15.08
 -9 -12 0 190.67 25.94
 9 -12 0 146.68 24.28
 -9 12 0 184.32 24.83
 10 -12 0 53 15.91
 -10 -12 0 51.78 14.33
 -10 -12 0 47.06 11.28
 -10 12 0 48.06 13.87
 -11 12 0 50.95 15.5
 11 -12 0 29.34 13.43
 -11 -12 0 28.06 11.01
 -11 -12 0 28.58 9.18
 -12 -12 0 -4.33 4.91
 12 -12 0 3.33 4.81
 -13 12 0 70.93 17.75
 13 -12 0 37.97 15.43
 0 -13 0 -0.82 3.73
 0 13 0 15.77 6.24
 1 13 0 17.17 5.11
 -1 -13 0 10.51 6.24
 1 -13 0 18.74 7.51
 -1 13 0 21.98 7.23
 2 -13 0 6 5.96
 -2 -13 0 0.76 2.92
 -2 13 0 13.4 6.71
 -3 13 0 15.44 7.35
 3 -13 0 12.63 6.8
 -3 -13 0 13.17 6.7
 -4 13 0 299.11 26.46
 4 -13 0 278.58 29.41
 -4 -13 0 320.72 30.28
 -5 13 0 536.97 36.78
 5 -13 0 477.68 39.35
 -5 -13 0 564.3 41.25
 -6 13 0 243 25.83
 6 -13 0 204.74 26.77
 -6 -13 0 205.3 25.94
 -7 -13 0 180.16 24.59
 7 -13 0 178.53 26.12
 -7 13 0 187.52 23.98
 8 -13 0 40.08 13.62
 -8 13 0 33.64 12.74
 -8 -13 0 49.22 13.32
 -9 13 0 17.08 10.26
 -9 -13 0 10.41 7.26
 9 -13 0 2.12 5.76
 10 -13 0 62.13 17.39
 -10 13 0 99.94 19.99
 -10 -13 0 105.32 20.7
 -11 -13 0 122.34 22.87
 11 -13 0 119.36 24.62
 -11 13 0 131.02 22.95
 -12 13 0 51.97 15.26
 12 -13 0 25.44 12.24
 -12 -13 0 22.63 10.43
 13 -13 0 38.71 16.33
 -13 -13 0 14.55 9.23
 -13 13 0 42.04 14.71
 -14 -13 0 10.34 8.76
 0 -14 0 168.03 22.73
 -1 -14 0 6.29 10.82
 -1 14 0 12.5 6.46
 1 -14 0 4.16 4.45
 -2 -14 0 19.7 8.24
 -2 14 0 25.35 8.61
 2 -14 0 26.1 9.66
 3 -14 0 27.44 10.15
 -3 -14 0 18.28 7.54
 -3 14 0 46.66 11.24
 -4 -14 0 19.84 8.8
 4 -14 0 23.68 9.23
 -4 14 0 13.88 8.06
 -5 -14 0 28.01 9.8
 -5 14 0 24.54 9.34
 5 -14 0 27.33 10.14
 -6 14 0 36.99 12.6
 6 -14 0 17.16 9.61
 -6 -14 0 14.23 6.71
 -7 14 0 198.57 25.19
 7 -14 0 240.19 30.69
 -7 -14 0 214.82 27.49
 -8 -14 0 128.03 21.83
 -8 14 0 147.89 22.77
 8 -14 0 163.19 26.75
 -9 -14 0 54.7 15.11
 9 -14 0 54.87 16.32
 -9 14 0 66.9 16.04
 -10 -14 0 -1.36 4.03
 10 -14 0 20.37 11.61
 -10 14 0 31.54 12.46
 11 -14 0 3.15 7.67
 -11 14 0 19.6 10.97
 -11 -14 0 5.77 7.08
 -12 14 0 17.99 11.35
 12 -14 0 8.79 8.76
 -12 -14 0 3.81 6.53
 -13 -14 0 -0.33 6.2
 0 -15 0 5.92 4.99
 1 -15 0 14.33 7.3
 -1 -15 0 28.06 10.32
 2 -15 0 10.54 6.85
 -2 -15 0 13.33 7.56
 -2 15 0 22.76 7.93
 3 -15 0 8.63 7.31
 -3 -15 0 7.37 7.74
 -3 15 0 24.22 8.98
 4 -15 0 10.49 7.05
 -4 -15 0 5.85 5.35
 -4 15 0 19.68 9.01
 -5 15 0 44.8 12.58
 -5 -15 0 8.56 6.13
 5 -15 0 21.15 9.75
 -6 15 0 82.67 16.57
 -6 -15 0 61.5 14.76
 6 -15 0 36.8 13.12
 -7 -15 0 22.57 10.51
 7 -15 0 46.63 14.65
 -7 15 0 42.85 12.88
 8 -15 0 0.59 4.07
 -8 -15 0 -0.38 3.51
 -8 15 0 6.24 8.36
 9 -15 0 7.63 8.31
 -9 -15 0 6.48 6.14
 -9 15 0 16.77 11.17
 10 -15 0 31.19 13.51
 -10 -15 0 -0.87 5.78
 -10 15 0 22.35 11.95
 -11 -15 0 4.66 5.33
 11 -15 0 7.1 8.66
 -12 -15 0 3.79 6.72
 0 -16 0 0.94 3.34
 1 -16 0 3.72 5.64
 -1 -16 0 23.24 9.56
 -2 -16 0 -0.42 3.45
 2 -16 0 -0.99 3.92
 3 -16 0 0.1 4.52
 -3 -16 0 7.09 6.45
 -4 -16 0 12.25 7.61
 4 -16 0 12.6 8.54
 -4 16 0 12.55 7.92
 -5 -16 0 -12.45 7.46
 5 -16 0 2.08 4.21
 -5 16 0 15.94 9.23
 -6 16 0 13.67 8.43
 6 -16 0 3.23 6.06
 -6 -16 0 1.17 3.4
 -7 16 0 14.53 8.74
 7 -16 0 6.64 7.26
 -7 -16 0 7 6.28
 -8 16 0 33.53 12.65
 8 -16 0 23.39 10.98
 -8 -16 0 35.02 12.47
 9 -16 0 4.27 5.76
 -9 -16 0 15.49 9.26
 -10 16 0 -2.78 7.1
 -10 -16 0 -2.83 6.69
 10 -16 0 -2.39 5.84
 -11 -16 0 12.2 7.58
 0 -17 0 5.34 6.7
 1 -17 0 21.78 9.95
 -1 -17 0 4.66 6.07
 -2 -17 0 2.58 5.89
 2 -17 0 0.91 4.2
 3 -17 0 3.16 4.02
 -3 -17 0 1.98 3.54
 4 -17 0 10.07 7.05
 -4 -17 0 6.96 6.36
 -5 -17 0 27.58 11.14
 5 -17 0 19.9 9.95
 -6 -17 0 32.36 11.68
 6 -17 0 23.35 10.7
 -6 17 0 35.21 12.6
 -7 -17 0 35.27 12.53
 7 -17 0 34.21 13.45
 -7 17 0 42.32 13.59
 -8 -17 0 11.82 9.55
 8 -17 0 7.45 7.57
 -8 17 0 29.24 12.06
 -9 -17 0 5.52 5.87
 -9 17 0 22.83 10.31
 0 -18 0 10.12 7.47
 1 -18 0 4.27 3.42
 -1 -18 0 9.14 7.35
 -2 -18 0 34.7 12.81
 2 -18 0 58.91 16.05
 -3 -18 0 63.92 16.38
 3 -18 0 79.32 18.85
 -4 -18 0 13.57 8.11
 4 -18 0 20.81 10.58
 5 -18 0 7.98 5.74
 -5 -18 0 10.78 7.02
 -6 -18 0 23.18 10.89
 6 -18 0 8.76 6.11
 7 -18 0 10.26 8.24
 -7 -18 0 10.54 7.9
 -8 -18 0 36.31 12.35
 0 -19 0 -0.51 3.75
 1 -19 0 -6.2 5.89
 -1 -19 0 0.6 5.55
 2 -19 0 -5.21 6.57
 -2 -19 0 2.84 6.8
 3 -19 0 0.76 6.39
 -3 -19 0 13.82 9.39
 -4 -19 0 55.86 15.59
 4 -19 0 49.98 15.72
 -5 -19 0 44.65 14.71
 18 0 -1 0.95 8.76
 17 0 -1 -1.17 6.18
 -17 0 1 10.76 7.89
 16 0 -1 2.87 5.77
 -16 0 1 3.32 6.39
 15 0 -1 1.01 4.77
 -15 0 1 5.96 6.75
 14 0 -1 -1.32 7.49
 -14 0 1 9.52 6.15
 -13 0 1 2.96 5.88
 13 0 -1 5.74 5.51
 12 0 -1 2.66 5.89
 -12 0 1 8.56 7.46
 -11 0 1 34.18 10.32
 11 0 -1 5.49 5.45
 10 0 -1 -0.23 3.28
 10 0 -1 1.68 1.63
 -10 0 1 7.68 6.42
 9 0 -1 -0.93 1.24
 -9 0 1 -2.05 3.28
 9 0 -1 1.8 4.37
 8 0 -1 6.41 6.3
 8 0 -1 0.4 1.02
 -8 0 1 7.19 4.96
 -7 0 1 37.92 8.07
 7 0 -1 5.32 6.05
 7 0 -1 28.84 4.11
 6 0 -1 1.43 2.57
 6 0 -1 -0.06 0.87
 -6 0 1 5 3.97
 -5 0 1 2.09 3.54
 5 0 -1 0.54 0.89
 5 0 -1 0.74 2.55
 4 0 -1 3.97 2.58
 -4 0 1 1.06 1.54
 -4 0 1 1.6 2.41
 4 0 -1 0.39 2.03
 4 0 -1 1.02 1.49
 -3 0 1 -0.97 3.01
 3 0 -1 0.48 1.44
 -3 0 1 -0.04 1.68
 3 0 -1 2.56 3.09
 -3 0 1 0.89 1.35
 3 0 -1 3.08 2.1
 -2 0 1 0.03 0.98
 -2 0 1 0.54 1.29
 2 0 -1 -1.11 1.58
 2 0 -1 -1.93 1.49
 2 0 -1 0.51 1.16
 1 0 -1 0.62 0.65
 1 0 -1 1.02 1.37
 0 0 -1 0.26 0.64
 1 0 1 0.2 1.62
 2 0 1 4.57 3.19
 -2 0 -1 0.53 1.28
 3 0 1 -0.76 2.99
 3 0 1 14.89 5.47
 -3 0 -1 3.37 2.91
 4 0 1 -0.89 2.55
 5 0 1 -0.02 3.06
 -6 0 -1 -0.44 2.9
 6 0 1 -2.72 4.46
 -7 0 -1 -0.19 2.53
 7 0 1 -2.37 3.42
 8 0 1 1.83 3.4
 -8 0 -1 -0.36 2.44
 -9 0 -1 5.67 4.75
 9 0 1 2.04 4.35
 10 0 1 -4.93 6.01
 -10 0 -1 6.41 5.27
 11 0 1 39.33 15.87
 11 0 1 51.47 14.02
 -11 0 -1 37.95 10.9
 12 0 1 13.3 8.65
 -12 0 -1 -7.18 7.01
 12 0 1 -0.39 6.64
 13 0 1 2.41 4.71
 -13 0 -1 3.78 5.37
 13 0 1 9.28 7.29
 14 0 1 -2.88 4.93
 -14 0 -1 8.51 6.37
 14 0 1 -1.98 4.32
 15 0 1 -0.4 7.96
 -15 0 -1 6.95 6.04
 15 0 1 0.62 5.55
 16 0 1 -2.13 5.05
 -16 0 -1 10.93 7.82
 17 0 1 -6.96 6.36
 -17 0 -1 -3.85 5.14
 -18 1 1 22.35 10.27
 18 -1 -1 10.14 8.03
 17 -1 -1 11.15 9.95
 17 1 -1 12.27 9.62
 -17 1 1 22.35 9.99
 16 -1 -1 -7.87 9.34
 16 1 -1 4.25 7.36
 -16 1 1 -2.56 4.57
 -16 -1 1 0.92 4.39
 15 -1 -1 15.84 10.77
 -15 -1 1 24.78 8.94
 15 1 -1 6.1 7.69
 -15 1 1 24.51 9.24
 -14 -1 1 41.16 10.62
 14 -1 -1 9.5 6.96
 -14 1 1 32.41 10.14
 14 1 -1 12.8 7.06
 13 -1 -1 12.34 5.75
 -13 1 1 18.99 8.25
 13 -1 -1 9.78 8.34
 13 1 -1 10.57 7.45
 -12 -1 1 39.92 9.77
 12 1 -1 24.07 9.73
 12 -1 -1 25.41 10.56
 -12 1 1 32.97 10.48
 -11 -1 1 70.36 11.58
 11 -1 -1 31.96 11.8
 11 1 -1 64.39 15.47
 -11 1 1 69.16 12.75
 10 1 -1 65.74 14.84
 10 -1 -1 84.14 16.62
 -10 -1 1 83.72 12.31
 -10 1 1 105.02 14.58
 9 1 -1 16.19 3.54
 -9 -1 1 25.04 7.35
 -9 1 1 28.93 8.55
 9 1 -1 11.4 5.43
 9 -1 -1 25.25 9.18
 -8 1 1 237.25 19.05
 -8 -1 1 257.03 17.86
 8 -1 -1 223.86 24.08
 8 1 -1 232.14 23.83
 7 1 -1 0.26 3.23
 7 -1 -1 5.46 3.84
 -7 -1 1 7.86 4.56
 -7 1 1 8.69 5.28
 -6 1 1 5.29 4.14
 6 1 -1 1.91 3.58
 -6 -1 1 13.83 4.65
 6 -1 -1 5.76 4.14
 5 1 -1 117.71 9.79
 -5 -1 1 116.1 9.69
 5 -1 -1 120.41 12.93
 5 1 -1 129.94 13.69
 -5 1 1 127.71 11.57
 4 -1 -1 4.71 3.1
 -4 1 1 4.22 1.68
 -4 -1 1 2.44 1.9
 4 1 -1 2.06 1.9
 -4 -1 1 6.5 2.57
 4 1 -1 8.74 3.23
 -4 1 1 5.98 4.03
 3 -1 -1 9.08 3.98
 -3 1 1 4.12 2.36
 3 -1 -1 2.26 1.64
 -3 -1 1 -5.35 3.72
 3 1 -1 0.87 2.24
 -3 1 1 4.5 3.98
 3 1 -1 0.05 1.16
 -3 1 1 1.52 1.66
 -3 -1 1 2.4 1.96
 3 1 -1 3.76 2.48
 -2 1 1 380.17 14.49
 2 1 -1 362.27 13.03
 -2 1 1 357.78 14.17
 -2 -1 1 380.46 12.76
 2 -1 -1 360.14 14.27
 2 -1 -1 376.17 14.35
 2 1 -1 348.98 13.25
 -1 -1 1 245.5 10.84
 1 -1 -1 260.61 10.75
 1 1 -1 253.19 10.85
 -1 -1 1 251.35 10.5
 1 -1 -1 239.71 10.68
 1 1 -1 243.94 10.25
 0 -1 -1 357.95 12.04
 0 -1 1 335.45 11.62
 -1 1 -1 1729.78 33.71
 1 -1 1 1766.67 26.1
 -1 1 -1 1763.38 26.18
 -1 1 -1 1603.33 26.15
 -2 1 -1 102.05 9.13
 2 -1 1 110.25 6.54
 2 -1 1 107.14 9.06
 2 -1 1 100.92 8.9
 -2 1 -1 96.95 8.54
 3 -1 1 252.23 9.97
 -3 1 -1 275.79 16.19
 -3 1 -1 248.82 16.19
 3 -1 1 246.81 15.4
 -3 -1 -1 252.47 17.05
 3 -1 1 250.57 16.31
 4 -1 1 2.47 2.77
 4 -1 1 0.39 2.36
 5 -1 1 71.95 10.11
 5 -1 1 100.96 13.1
 -5 1 -1 76.51 9.15
 6 -1 1 -1.3 2.73
 6 1 1 1.23 3.74
 -6 1 -1 0.09 2.87
 -6 -1 -1 -3.99 3.87
 6 -1 1 -1.57 2.74
 7 -1 1 50.41 9.77
 -7 1 -1 47.84 8.55
 7 -1 1 45.38 10.46
 -7 -1 -1 48.7 7.77
 7 1 1 58.25 12.49
 8 -1 1 22.53 8.3
 -8 1 -1 29.91 7.28
 -8 -1 -1 25.41 6.27
 8 1 1 16.1 7.47
 8 -1 1 29.53 8.29
 -9 -1 -1 68.16 10.47
 9 -1 1 60.08 5.09
 -9 1 -1 50.51 10.45
 9 -1 1 55.97 11.41
 9 -1 1 56.72 13.7
 9 1 1 51.26 13.39
 10 -1 1 13.49 7.43
 -10 1 -1 24.98 8.78
 10 -1 1 18.56 2.81
 -10 -1 -1 22.33 7.75
 10 -1 1 19.63 8.17
 10 1 1 6.64 5.77
 11 -1 1 57.08 13.48
 -11 -1 -1 118.32 14.66
 -11 1 -1 64.26 12.58
 11 -1 1 59.7 16.82
 12 1 1 224.8 31.52
 -12 -1 -1 233.63 21.47
 12 -1 1 226.13 31.36
 -12 1 -1 200.25 20.94
 12 -1 1 224.56 25.86
 13 -1 1 3.23 5.32
 -13 -1 -1 10.59 4.33
 -13 1 -1 10.87 4.68
 13 -1 1 7.88 5.88
 -14 -1 -1 28.88 9.22
 14 1 1 48.11 15.49
 14 -1 1 35.6 11.65
 14 -1 1 23.15 11.64
 -14 1 -1 38.69 10.68
 15 -1 1 11.66 9.32
 -15 -1 -1 23.41 8.84
 -15 1 -1 18.05 8.2
 15 -1 1 13.78 7.12
 15 1 1 18.46 10.65
 -16 1 -1 0.62 5.42
 16 1 1 7.88 8.41
 -16 -1 -1 0.39 4.84
 16 -1 1 1.07 5.14
 16 -1 1 14.04 11.23
 -17 1 -1 27.66 10.68
 17 1 1 13.84 9.47
 17 -1 1 9.23 7.68
 -18 1 -1 17.51 8.19
 18 -2 -1 -0.18 6.58
 -18 2 1 -8.33 7.18
 -17 2 1 19.7 10.04
 17 -2 -1 11.6 10.34
 -16 2 1 8.5 7.83
 16 -2 -1 4.44 6.96
 -15 -2 1 32.71 9.63
 15 -2 -1 15.56 10.26
 -15 2 1 34.09 11.63
 -14 2 1 6.47 7.32
 14 -2 -1 0.44 4.34
 14 2 -1 4.53 7.72
 -14 -2 1 4.87 5.38
 13 2 -1 -1.82 6.01
 13 -2 -1 2.22 4.67
 13 -2 -1 5.29 4.03
 -13 -2 1 9.9 5.88
 -12 -2 1 35.92 9.4
 12 -2 -1 34.09 8.66
 12 -2 -1 56.14 16.11
 12 2 -1 36.79 12.61
 -12 2 1 39.69 11.29
 11 -2 -1 227.66 19.76
 11 -2 -1 213.03 27.72
 11 2 -1 206.35 27.62
 -11 -2 1 227.61 19.54
 -11 2 1 243.35 23.28
 10 -2 -1 125.25 20.43
 10 2 -1 183.3 24.42
 10 -2 -1 162.75 15.77
 -10 -2 1 169.8 15.62
 -10 2 1 196.52 20.39
 -9 -2 1 100.41 11.76
 9 -2 -1 95.47 11.51
 -9 2 1 105.05 14.05
 9 2 -1 139.17 19.74
 9 -2 -1 102.94 17.18
 8 -2 -1 471.76 34.23
 8 2 -1 459.94 33.73
 -8 2 1 436.99 26.58
 -8 -2 1 459.86 22.44
 8 -2 -1 445.86 21.8
 7 2 -1 107.09 15.18
 7 -2 -1 123.67 16.22
 -7 -2 1 102.87 10.27
 -7 2 1 109.8 13.11
 7 -2 -1 102.23 9.65
 6 -2 -1 96.11 13.21
 -6 2 1 121.21 12.85
 6 -2 -1 99.67 8.26
 6 2 -1 103.93 13.77
 -6 -2 1 102.85 9.24
 5 -2 -1 193.27 9.66
 5 2 -1 219.89 12.34
 -5 2 1 230.79 15.86
 -5 2 1 214.26 8.34
 5 -2 -1 207.88 17.19
 5 2 -1 212.59 17.68
 -5 -2 1 211.66 11.78
 4 2 -1 1119.66 24.42
 -4 -2 1 1120.57 35.64
 4 2 -1 1177.29 36.53
 -4 -2 1 1138.14 24.96
 -4 2 1 1149.63 32.58
 4 -2 -1 1183.17 36.21
 3 2 -1 369.3 12.93
 -3 -2 1 387.74 17.75
 -3 2 1 388.36 18.31
 3 2 -1 383.82 17.82
 -3 -2 1 379.93 17.5
 3 -2 -1 384.58 18.4
 -3 2 1 382.72 17.44
 -2 2 1 525.03 18.58
 2 -2 -1 513.7 19.41
 2 2 -1 542.02 18.91
 -2 -2 1 506.03 16.17
 -2 -2 1 510.49 18.65
 -2 2 1 532.69 19.58
 2 -2 -1 509.47 18.15
 -1 -2 1 29.42 4.62
 -1 2 1 39.59 5.27
 1 2 -1 39.41 5.08
 1 -2 -1 35.64 4.5
 -1 2 1 25.8 3.36
 1 -2 -1 42.02 5.36
 0 2 1 1955.14 34.76
 0 -2 -1 1941.25 34.31
 -1 2 -1 859.04 17.85
 -1 2 -1 906.22 20.07
 -1 -2 -1 851.21 23
 1 -2 1 880.99 19.09
 -2 2 -1 24.38 3.34
 2 -2 1 19.81 3.91
 -2 2 -1 16.93 3.92
 -2 2 -1 21.15 3.92
 -3 2 -1 106.6 6.54
 -3 2 -1 106.13 9.91
 3 -2 1 105.49 10.66
 -3 2 -1 103.38 10.11
 3 -2 1 94.81 6.49
 4 -2 1 149.62 7.74
 4 -2 1 137.34 12.74
 4 -2 1 145.92 14.48
 5 -2 1 36.63 3.85
 5 -2 1 35.92 8.28
 -5 2 -1 28.7 6.19
 5 -2 1 39.79 7.29
 -6 2 -1 178.97 15.73
 6 -2 1 165.65 7.84
 6 -2 1 180.01 16.72
 -6 -2 -1 166.53 12.3
 6 -2 1 175.91 19.08
 7 -2 1 208.35 8.54
 7 -2 1 206.66 22.22
 -7 -2 -1 208.5 14.94
 7 -2 1 198.85 18.6
 -7 2 -1 248.19 19.61
 -8 -2 -1 149.08 13.64
 8 -2 1 125.79 15.78
 8 -2 1 144.45 19.73
 8 -2 1 137.52 6.62
 -8 2 -1 153.85 16.22
 -9 2 -1 138.95 16.29
 9 -2 1 112.64 18.99
 9 -2 1 93.56 14.48
 -9 -2 -1 125.29 13.25
 -10 -2 -1 36.44 8.33
 -10 2 -1 45.42 11.11
 10 -2 1 9.59 6.79
 10 -2 1 23 7.87
 11 -2 1 302.12 28.32
 -11 -2 -1 281.1 22.03
 -11 2 -1 310.47 26.19
 11 -2 1 277.76 32.44
 12 -2 1 135.39 19.69
 -12 -2 -1 136.51 15.94
 -12 2 -1 132.74 17.05
 12 -2 1 113.89 22.54
 13 -2 1 55.66 13.56
 -13 -2 -1 66.01 11.78
 -13 2 -1 36.26 9.58
 13 -2 1 73.11 18.49
 14 -2 1 20.61 11.7
 -14 -2 -1 34.34 9.62
 14 -2 1 12.87 6.14
 -14 2 -1 11.4 5.79
 -15 2 -1 -0.48 4.62
 -15 -2 -1 3.55 4.5
 15 -2 1 -6.51 7.1
 15 -2 1 11.47 9.24
 16 -2 1 18.53 9.43
 -16 2 -1 22.84 10.05
 16 2 1 27.78 12.87
 16 -2 1 18.83 12.48
 17 2 1 21.73 11.15
 -17 2 -1 19.8 9.36
 17 -2 1 1.95 6.7
 -18 2 -1 8.77 6.75
 18 2 1 0.69 4.54
 -18 3 1 65.66 16.66
 -17 3 1 89.73 18.27
 17 -3 -1 72.73 22.26
 16 -3 -1 0.67 8.01
 -16 3 1 17.17 9.42
 15 -3 -1 54.72 17.55
 -15 3 1 89.82 17.24
 -14 -3 1 -0.65 3.69
 14 -3 -1 -4.46 7.28
 -14 3 1 -0.34 5.55
 13 -3 -1 56.65 16.41
 -13 3 1 78.72 15.12
 -13 -3 1 69.47 11.79
 -12 3 1 73.67 14.97
 12 -3 -1 79.31 19.02
 -12 -3 1 82.98 12.09
 12 -3 -1 71.95 11.34
 -11 -3 1 21.1 8.52
 11 -3 -1 14.06 4.88
 11 -3 -1 0.72 4.47
 -11 3 1 14.02 8.08
 10 -3 -1 300.81 31.01
 -10 3 1 334.41 26.64
 10 -3 -1 276.68 19.63
 -10 -3 1 277.05 18.98
 9 -3 -1 39.24 7
 9 -3 -1 37.04 10.52
 -9 -3 1 38.89 7.18
 -9 3 1 42.19 10.07
 8 -3 -1 184.41 21
 8 -3 -1 188.14 13.61
 -8 3 1 194.96 18.87
 -8 -3 1 189.03 13.66
 -7 -3 1 215.28 13.52
 -7 3 1 194.48 7.03
 7 -3 -1 210.49 12.86
 -7 3 1 209.53 18.34
 7 -3 -1 193.94 19.93
 6 -3 -1 2740.79 68.85
 -6 3 1 2663 29.3
 -6 -3 1 2689.66 42.95
 6 3 -1 2731.26 44.36
 -6 3 1 2650.06 60.25
 5 3 -1 888.85 22.57
 5 -3 -1 941.42 37
 -5 3 1 895.94 32.76
 -4 3 1 172.71 13.72
 4 3 -1 154.6 8.42
 -4 -3 1 175.52 13.66
 4 -3 -1 169.48 14.61
 -4 -3 1 164.41 13.79
 3 3 -1 59.76 4.73
 -3 3 1 76.9 9.08
 -3 -3 1 59.74 7.24
 -3 -3 1 76.24 8.67
 3 -3 -1 66.31 8.23
 2 -3 -1 1072.7 28.05
 2 -3 -1 1026.68 30.38
 -2 -3 1 1036.54 29.08
 -2 3 1 1092.4 28.49
 1 3 -1 65.14 6.99
 1 -3 -1 74.25 7.19
 -1 -3 1 64.43 4.99
 1 -3 -1 69.88 7.86
 -1 3 1 56.76 5.88
 -1 3 1 67.97 7.86
 0 3 -1 4327.59 40.95
 0 -3 1 4387.51 40.1
 0 -3 -1 4294.38 47.08
 0 -3 -1 4374.36 59.59
 0 3 1 4397.11 60.09
 -1 -3 -1 249.62 14.4
 -1 3 -1 272.12 11.56
 1 -3 1 268.26 11.48
 2 -3 1 700.58 22.39
 -2 3 -1 680.04 21.12
 -2 -3 -1 705.59 13.4
 3 -3 1 409.47 20.21
 -3 3 -1 420 19.46
 -3 3 -1 404.27 14.16
 -4 3 -1 13.89 2.67
 -4 3 -1 15.78 3.89
 4 -3 1 23.61 5.62
 -5 3 -1 433.48 13.28
 -5 3 -1 467.81 24.68
 5 -3 1 447.26 27.27
 6 -3 1 225.28 21.37
 -6 3 -1 214.58 18.18
 6 -3 1 225.04 18.8
 -7 3 -1 152.44 15.96
 7 -3 1 166.74 17.12
 -7 -3 -1 164.5 12.6
 7 -3 1 186.42 21.17
 8 -3 1 76.98 12.65
 8 -3 1 90.04 15.71
 -8 -3 -1 83.49 9.64
 -8 3 -1 85.54 13.02
 9 -3 1 832.68 42.52
 -9 3 -1 838.73 40.67
 -9 -3 -1 850.08 32.71
 9 -3 1 858.52 51.72
 -10 -3 -1 416.83 24.17
 10 -3 1 365.24 29.25
 -10 3 -1 418.48 30.12
 10 -3 1 385.83 36.46
 11 -3 1 467.03 42.34
 -11 -3 -1 476.87 27.26
 11 -3 1 413.82 32.47
 -11 3 -1 461.66 32.89
 12 -3 1 435.93 42.69
 -12 -3 -1 476.74 28.63
 -12 3 -1 445.93 33.54
 12 -3 1 425.7 34.63
 -13 3 -1 -13.82 8.39
 -13 -3 -1 -4.67 3.72
 13 -3 1 -0.77 3.45
 13 -3 1 12.19 9.67
 -14 -3 -1 5.57 5.58
 14 -3 1 4.67 7.69
 -14 3 -1 -3.78 6.31
 14 -3 1 5.71 4.92
 -15 3 -1 13.54 7.7
 15 -3 1 5.63 4.75
 15 -3 1 21.58 11.37
 -16 3 -1 39.7 12.36
 16 -3 1 24.72 13.05
 17 -3 1 -2.92 9.09
 -17 3 -1 10.11 8.2
 18 3 1 49.22 16.71
 -18 3 -1 33.32 11.35
 -18 4 1 21.11 10.04
 17 -4 -1 16.95 10.69
 -17 4 1 12.63 7.78
 16 -4 -1 -1.49 7.28
 -16 4 1 10.79 7.74
 -15 4 1 14.19 9.16
 15 -4 -1 3.91 7.82
 -14 4 1 23.84 10.17
 14 -4 -1 -7.49 9.04
 13 -4 -1 40.4 14.86
 -13 4 1 38.14 11.87
 12 -4 -1 -4.28 4.08
 -12 -4 1 1.31 3.17
 11 -4 -1 165.66 25.15
 -11 4 1 207.05 22.99
 -11 -4 1 162.36 14.97
 10 -4 -1 758.88 49.24
 -10 -4 1 757.56 29.83
 -10 4 1 867.12 43.69
 -9 -4 1 523.93 22.8
 9 -4 -1 548.18 39.02
 -9 4 1 472.15 31.07
 -8 -4 1 742.12 24.97
 -8 4 1 653.8 35.25
 8 -4 -1 752.26 42.58
 -7 4 1 11.91 6.81
 -7 -4 1 1.63 2.57
 7 4 -1 8.79 3.13
 7 -4 -1 6.37 4.06
 -7 4 1 4.7 1.49
 -6 4 1 98.59 13.17
 6 4 -1 86.8 7.37
 6 -4 -1 86.23 12.92
 -5 -4 1 300.47 19.62
 5 -4 -1 305.07 21.83
 5 4 -1 295.26 11.91
 -5 4 1 335.89 21.38
 -4 -4 1 2554.27 53.85
 -4 4 1 2541.33 53.82
 -4 4 1 2486.87 32.54
 4 4 -1 2489.3 30.58
 4 -4 -1 2533.12 58.69
 -3 4 1 755.56 27.34
 3 -4 -1 747.2 30.16
 -3 -4 1 756.09 27.79
 -2 -4 1 467.19 21.05
 2 -4 -1 492.71 23.35
 -2 -4 1 471.39 16.92
 -2 4 1 510.89 20.68
 1 -4 -1 90.48 9.96
 -1 4 1 86.69 8.09
 1 -4 -1 98.23 8.64
 -1 -4 1 78.81 6.9
 0 4 -1 584.64 18.71
 0 -4 -1 753.49 27.46
 0 -4 1 568.33 18.39
 0 -4 -1 685.04 19.65
 0 4 1 716.98 20.79
 -1 -4 -1 9.48 2.53
 -1 4 -1 8.29 2.51
 -1 -4 -1 9.04 3.67
 1 -4 1 5.54 2.04
 1 4 1 8.08 1.6
 -2 4 -1 9.37 2.71
 -2 -4 -1 23.44 5.97
 -2 -4 -1 13.55 2.45
 2 -4 1 17.95 4.19
 -3 4 -1 -2.29 3.7
 3 -4 1 2.68 2.41
 -3 -4 -1 3.07 2.16
 -4 4 -1 82.93 10.28
 4 -4 1 61.26 9.22
 -4 4 -1 78.54 6.58
 5 -4 1 881.19 37.99
 -5 4 -1 914.64 21.51
 -5 4 -1 916.53 36.74
 -6 4 -1 470.04 14.7
 6 -4 1 489.57 31.26
 -6 4 -1 501.9 28.56
 -7 -4 -1 1873.61 39.55
 7 -4 1 1812.54 65.8
 -7 4 -1 1752.13 55.53
 8 -4 1 872.26 49.41
 -8 4 -1 887.51 41.6
 -8 -4 -1 876.47 29.11
 -9 -4 -1 123.26 11.97
 -9 4 -1 155.71 18.74
 9 -4 1 92.98 17.64
 10 -4 1 132.85 22.06
 -10 -4 -1 187.04 15.42
 10 -4 1 152.55 19.01
 -10 4 -1 176.62 20.55
 -11 -4 -1 19.87 5.93
 -11 4 -1 -3.09 8.74
 11 -4 1 20.6 7.91
 11 -4 1 6.14 5.33
 12 -4 1 55.77 12.53
 12 -4 1 42.91 14.41
 -12 4 -1 45.1 11.78
 -12 -4 -1 54.53 9.71
 13 -4 1 169.84 28.32
 -13 -4 -1 155.9 16.65
 13 -4 1 153.58 21.28
 -13 4 -1 153.17 21.03
 14 -4 1 197.69 31.4
 14 -4 1 187.28 24.46
 -14 4 -1 172.55 23.17
 15 -4 1 1.58 5.83
 -15 4 -1 14.39 8.61
 -16 4 -1 60.73 15.81
 16 -4 1 38.3 17.24
 -17 4 -1 15.76 10.1
 17 -4 1 -8.95 11.67
 -18 4 -1 12.52 9.12
 -17 5 1 95.22 20.2
 17 -5 -1 85.08 23.85
 16 -5 -1 18.12 11.55
 -16 5 1 44.59 14.04
 -15 5 1 134.74 22.07
 15 -5 -1 122.28 27.35
 14 -5 -1 31.46 13.33
 -14 5 1 33.42 12.74
 -13 5 1 65.15 14.83
 13 -5 -1 50.91 17.01
 -12 5 1 50.56 13.07
 12 -5 -1 24.09 10.72
 11 -5 -1 250.43 30.61
 -11 5 1 218.27 24.59
 -11 -5 1 196.95 14.99
 10 -5 -1 91.88 17.69
 -10 5 1 118.49 18.53
 -10 -5 1 79.93 8.83
 -9 5 1 77.76 15.22
 9 -5 -1 69.46 14.15
 8 -5 -1 572.71 38.85
 -8 -5 1 652.95 34.7
 8 5 -1 595.79 21.97
 -8 5 1 557.38 33.45
 -8 5 1 566.51 13.53
 -7 5 1 415.06 27.6
 7 -5 -1 459.29 31.78
 -7 -5 1 467.02 28.38
 7 5 -1 419.91 16.4
 -6 5 1 2244.14 60.1
 6 -5 -1 2146.89 65.75
 6 5 -1 2227.6 32.98
 -6 -5 1 2165.08 57.25
 5 -5 -1 513.31 29.71
 -5 5 1 472.53 26.33
 -5 5 1 452.05 16.66
 5 5 -1 481.15 13.27
 -5 -5 1 494.86 26.25
 -4 5 1 1551.65 43.99
 -4 -5 1 1539.39 44.07
 4 -5 -1 1575.19 48.6
 4 5 -1 1448.67 21.85
 -3 5 1 171.19 14.28
 -3 -5 1 152.7 13.53
 3 -5 -1 182.48 16.06
 -2 -5 1 642.74 22.65
 2 -5 -1 649.95 29.06
 -2 5 1 647.59 24.73
 -1 -5 1 72.09 7.47
 1 -5 -1 73.66 9.92
 -1 5 1 85.2 8.73
 1 5 -1 70.12 7.17
 0 5 1 1052.47 26.94
 0 -5 -1 1129.41 36.84
 0 -5 1 906.98 26.7
 0 -5 -1 1021.92 26.01
 0 5 -1 865.14 26.32
 1 -5 1 328.27 16.58
 -1 -5 -1 322.15 13.15
 -1 5 -1 349.65 17.33
 1 5 1 330.67 12.6
 -1 -5 -1 361.32 21.19
 2 -5 1 27.21 5.38
 -2 -5 -1 25.97 5.81
 2 5 1 27.3 3.85
 -2 5 -1 25.44 5.17
 -2 -5 -1 30.11 3.88
 -3 -5 -1 1263.7 26.84
 -3 5 -1 1328.06 40.66
 3 -5 1 1253.68 38.17
 4 -5 1 329.89 21.5
 -4 -5 -1 314.92 14.94
 -4 5 -1 308.65 20.77
 -5 5 -1 658.45 20.29
 -5 -5 -1 662.24 23.74
 5 -5 1 689.43 34.16
 -5 5 -1 711.31 33.4
 -6 5 -1 249.62 12
 6 -5 1 261.06 23.27
 -6 5 -1 261.56 21.85
 -7 -5 -1 59.25 6.53
 -7 5 -1 58.17 11.5
 7 -5 1 40.57 10.34
 -7 5 -1 58.68 5.44
 -8 5 -1 22.12 8.85
 -8 -5 -1 3.66 2.78
 8 -5 1 8.39 6.45
 -9 5 -1 699.52 40.13
 -9 -5 -1 659.52 25.43
 9 -5 1 644.01 45.69
 -10 5 -1 253.09 24.73
 10 -5 1 201.02 27.04
 -10 -5 -1 231.68 16.09
 -11 -5 -1 42.75 7.68
 11 -5 1 42.71 13.72
 -11 5 -1 33.82 9.24
 12 -5 1 222.87 31.54
 -12 5 -1 298.91 28.58
 -13 5 -1 -5.47 6.26
 13 -5 1 7.6 6.93
 -14 5 -1 1.97 5.44
 14 -5 1 -6.93 7.48
 15 -5 1 10.38 11.25
 -15 5 -1 34.29 12.37
 -16 5 -1 36.03 12.34
 16 -5 1 28.59 12.97
 17 -5 1 3.34 8.29
 -17 5 -1 21.47 12.84
 -17 6 1 121.02 22.2
 16 -6 -1 -5.51 8.91
 -16 6 1 30.44 12.52
 15 -6 -1 1.7 6.23
 -15 6 1 3.92 8.21
 -14 6 1 17.84 10.82
 14 -6 -1 -6.21 6.94
 13 -6 -1 103.5 22.13
 -13 6 1 133.95 21.69
 -12 6 1 93.41 17.63
 12 -6 -1 83.08 19.53
 -11 -6 1 338.15 30.37
 -11 6 1 287.37 28.06
 11 -6 -1 294.51 33.02
 -10 6 1 35.36 11.9
 -10 -6 1 27.6 10.39
 10 -6 -1 14.46 9.34
 9 -6 -1 41.53 11.55
 -9 -6 1 50.96 11.56
 -9 6 1 59.62 14.28
 -9 6 1 32.46 3.14
 -8 6 1 326.35 26.87
 8 -6 -1 361.51 31.43
 -8 -6 1 324.75 25.58
 8 6 -1 359.48 14.97
 -7 -6 1 14.77 7.28
 -7 6 1 5.84 6.97
 7 -6 -1 5.45 5.5
 -6 6 1 28.85 8.8
 6 6 -1 14.75 2.36
 -6 6 1 8.82 3.09
 -6 -6 1 20.94 7.13
 6 -6 -1 11.36 5.22
 5 6 -1 184.58 6.91
 -5 -6 1 209.61 18.17
 5 -6 -1 196.39 19.31
 -5 6 1 229.04 19.37
 -4 -6 1 1143.16 39.91
 4 6 -1 1107.23 17.44
 4 -6 -1 1158.56 44.46
 -4 6 1 1197.19 40.57
 -3 -6 1 1211.11 39.61
 -3 -6 1 1194.01 35.48
 -3 6 1 1219.77 38.47
 3 -6 -1 1233.13 44
 -2 -6 1 1531.12 38.76
 2 -6 -1 1555.38 48.74
 -2 6 1 1556.71 40.19
 1 -6 -1 432.53 25.38
 -1 -6 1 444.93 20.73
 -1 6 1 433.66 19.81
 0 -6 1 58.69 8.47
 0 -6 -1 49.43 8.29
 0 6 1 49.54 6.29
 0 6 -1 98.21 10.64
 -1 -6 -1 392.27 15.58
 1 -6 1 424.4 20.81
 -1 -6 -1 375.13 23.54
 1 6 1 390.01 15.7
 -1 6 -1 403.64 20.31
 2 6 1 64.73 6.43
 2 -6 1 59.84 8.35
 -2 -6 -1 67.06 5.91
 -2 -6 -1 56.17 8.96
 -2 6 -1 63.13 8.99
 -3 -6 -1 78.78 10.9
 -3 6 -1 88.22 11.03
 -3 -6 -1 91.35 6.34
 3 -6 1 78.38 10.14
 -4 -6 -1 311.88 15.85
 4 -6 1 332.59 22.46
 -4 -6 -1 307 10.81
 -4 6 -1 344.9 23.09
 -5 -6 -1 1285.57 34.75
 5 -6 1 1273.47 47.43
 -5 6 -1 1289.19 46.74
 6 -6 1 181.64 19.25
 -6 -6 -1 164.44 8.7
 -6 6 -1 169.81 18.24
 -6 -6 -1 164.88 13.61
 7 -6 1 945.75 47.73
 -7 6 -1 834.33 22.95
 -7 -6 -1 896.8 22.51
 -7 6 -1 818.96 40.96
 -7 -6 -1 875.28 33.61
 -8 6 -1 484.76 16.1
 -8 6 -1 508.86 33.43
 8 -6 1 502.91 37.34
 -8 -6 -1 502.54 18.41
 -9 -6 -1 181.45 11.89
 9 -6 1 190.47 24.75
 -9 6 -1 221.65 23.75
 -10 6 -1 -1.91 7.84
 10 -6 1 1.42 4.27
 -10 -6 -1 16.72 4.42
 -11 6 -1 209.94 23.94
 11 -6 1 225.32 30.62
 12 -6 1 1.14 6.09
 -12 6 -1 -2.44 6.36
 -13 6 -1 38.78 11.37
 13 -6 1 39.82 14.94
 -14 6 -1 75.76 16.31
 14 -6 1 108.27 24.04
 -15 6 -1 48 13.89
 15 -6 1 29.08 14.89
 16 -6 1 107.04 26.11
 -16 6 -1 111.55 20.85
 -17 6 -1 49.51 14.53
 -17 -7 1 61.29 16.55
 -16 7 1 47.81 15.66
 -16 -7 1 31.81 11.88
 16 -7 -1 22.59 12.08
 -15 -7 1 173.89 25.56
 15 -7 -1 124.1 27.5
 -15 7 1 174.62 25.42
 -14 -7 1 75.81 16.99
 -14 7 1 73.68 17.39
 14 -7 -1 37.28 15.21
 -13 -7 1 64.87 15.54
 13 -7 -1 43.06 16.06
 -13 7 1 83.69 17.8
 12 -7 -1 62.04 16.99
 -12 -7 1 67.6 14.62
 -12 7 1 95.63 18.4
 -11 -7 1 44.16 11.77
 -11 7 1 43.62 13.01
 11 -7 -1 27.36 11.56
 -10 7 1 13.4 8.16
 -10 -7 1 13.86 8.4
 10 -7 -1 1.22 4.23
 -9 -7 1 127.87 17.42
 -9 7 1 110.62 17.42
 9 -7 -1 110.35 18.93
 8 -7 -1 191.09 22.97
 -8 -7 1 175.04 19.51
 -8 7 1 187.3 21.3
 -7 7 1 54.44 11.84
 -7 -7 1 56.07 11.16
 7 -7 -1 52.21 11.46
 -6 7 1 518.66 31.51
 6 -7 -1 522.83 34.14
 -6 7 1 538.92 23.05
 -6 -7 1 550.69 31.48
 5 -7 -1 9.01 5.66
 -5 7 1 8.94 6.84
 -5 -7 1 12.46 5.17
 4 -7 -1 339.07 26.06
 -4 -7 1 283.79 19.39
 4 7 -1 271.42 8.65
 -4 7 1 339.55 22.98
 -4 -7 1 319.51 22.02
 -3 -7 1 414.14 22.62
 3 -7 -1 400.16 27.02
 3 7 -1 402.34 13.37
 -3 7 1 449.47 24.55
 -2 7 1 2.86 3.76
 2 -7 -1 -2.94 4.07
 -2 -7 1 2.77 2.25
 2 7 -1 1.04 1.88
 -1 -7 1 219.08 16.75
 1 7 -1 203.92 13.98
 0 -7 -1 988.22 40.19
 0 -7 1 1166.89 37.58
 0 7 -1 1053.48 33.22
 0 7 1 1068.14 30.58
 -1 7 -1 633.6 26.69
 -1 -7 -1 611.28 31.96
 1 -7 1 656.6 28.3
 1 7 1 608.97 22.02
 -1 -7 -1 628.57 21.43
 2 7 1 199.79 12.4
 -2 -7 -1 198.41 11
 2 -7 1 211.1 16.61
 -2 7 -1 190.51 15.73
 -2 -7 -1 197.8 18.16
 -3 -7 -1 842.08 19.51
 3 -7 1 872.36 35.55
 -3 -7 -1 879.89 38.83
 -3 7 -1 894.31 36.53
 4 -7 1 194.07 18.07
 -4 -7 -1 187.83 13.1
 -4 -7 -1 229.05 20.46
 -4 7 -1 189.93 17.92
 -4 -7 -1 191.89 8.21
 -5 -7 -1 135.83 11.95
 -5 7 -1 140.44 16.45
 -5 -7 -1 124.41 6.08
 5 -7 1 142.73 16.7
 -6 -7 -1 3.46 1.17
 -6 -7 -1 7.01 3.9
 -6 7 -1 14.52 8.01
 6 -7 1 3.02 5.16
 7 -7 1 155.15 19.95
 -7 -7 -1 151.11 7.64
 -7 -7 -1 161.88 15.16
 -7 7 -1 172.75 19.89
 -8 -7 -1 0.1 1.57
 -8 -7 -1 11.41 5.42
 -8 7 -1 19.33 9.93
 8 -7 1 1.99 3.09
 9 -7 1 177.76 23.97
 -9 -7 -1 204.49 19.23
 -9 7 -1 175.46 21.65
 -10 -7 -1 90.09 13.8
 -10 7 -1 59.4 12.28
 10 -7 1 65.31 16.65
 -11 7 -1 34.62 10.13
 11 -7 1 19.41 11.02
 -12 7 -1 326.29 31.8
 12 -7 1 292.08 37.28
 -13 7 -1 43.93 12.57
 13 -7 1 26.12 12.11
 -14 7 -1 43.75 13.08
 14 -7 1 30.01 13.38
 -15 7 -1 -5.53 7.76
 15 -7 1 -5.77 6.75
 -16 7 -1 24.25 11.55
 16 -7 1 0.22 6.42
 -17 -8 1 21.68 11.38
 -16 -8 1 1.4 5.66
 16 -8 -1 -4.47 7.34
 -16 8 1 13.96 8.6
 15 -8 -1 -2.68 8.82
 -15 -8 1 19.76 11.53
 -15 8 1 21.26 10.63
 -14 -8 1 6 6.87
 14 -8 -1 22.91 12.04
 -14 8 1 31.09 13.1
 -13 8 1 148.32 23.41
 13 -8 -1 130.39 25.76
 -13 -8 1 152.26 22.66
 -12 8 1 75.81 16.32
 -12 -8 1 72.61 15.51
 12 -8 -1 60.13 16.42
 11 -8 -1 276.91 33.78
 -11 -8 1 234.11 25.79
 -11 8 1 233.06 27.5
 -10 8 1 626.68 41.86
 -10 -8 1 488.43 35.37
 10 -8 -1 488.37 42.36
 -9 8 1 90.54 16.98
 -9 -8 1 123.88 17.63
 9 -8 -1 85.16 17.18
 -8 8 1 19.08 8.67
 8 -8 -1 11.73 7.13
 -8 -8 1 9.53 6.52
 -7 8 1 84 15.6
 -7 -8 1 97.11 14.42
 7 -8 -1 104.48 16.97
 -6 8 1 15.76 8.61
 -6 -8 1 2.22 3.64
 6 -8 -1 8.54 6.09
 -5 -8 1 -2.05 4.66
 -5 8 1 10.52 7.46
 5 -8 -1 1.14 3.16
 -5 -8 1 8.13 4.4
 -4 8 1 279.33 21.45
 -4 -8 1 288.44 21
 4 -8 -1 270.35 24.86
 4 8 -1 289.95 8.15
 -3 8 1 16.09 6.19
 3 8 -1 14.76 2.84
 -2 8 1 126.21 12.98
 2 -8 -1 124.58 15.52
 -2 -8 1 134.99 13.69
 2 8 -1 120.67 9.1
 1 -8 -1 390.5 27.25
 1 8 -1 460.59 20.48
 -1 -8 1 436.72 24.54
 -1 8 1 419.91 21.94
 0 8 1 508.64 22.41
 0 8 -1 603.84 26.31
 0 -8 1 598.53 30
 0 -8 -1 496.47 30.17
 1 8 1 714.29 24.22
 -1 8 -1 629.64 28.02
 -1 -8 -1 727.83 36.45
 1 -8 1 707.19 31.76
 -2 8 -1 2.96 3.35
 -2 -8 -1 0.31 2.95
 -2 -8 -1 -2.2 2.29
 2 -8 1 -2.1 3.27
 -3 -8 -1 311.7 12.79
 -3 8 -1 315.38 22.53
 3 -8 1 326.06 23.22
 -3 -8 -1 326.53 25.14
 -4 8 -1 340.54 24.64
 -4 -8 -1 298.3 10.68
 4 -8 1 322.71 24.12
 -4 -8 -1 315.91 25.21
 -5 -8 -1 361.53 9.1
 -5 8 -1 442.39 29.77
 -5 -8 -1 452.32 22.85
 -5 -8 -1 438.18 30.8
 5 -8 1 443.28 30.45
 -6 8 -1 130.97 17.55
 -6 -8 -1 99.77 11.59
 6 -8 1 84.27 14.4
 -7 -8 -1 128.52 13.97
 7 -8 1 146.92 19.55
 -7 8 -1 141.47 18.78
 -8 -8 -1 24.16 7.38
 8 -8 1 21.39 8.93
 -8 8 -1 21.38 8.74
 -9 -8 -1 6.22 5.39
 9 -8 1 0.67 4.14
 -10 -8 -1 124.21 16.51
 10 -8 1 118.99 22.13
 -10 8 -1 131.28 19.31
 -11 -8 -1 1.76 5.84
 11 -8 1 1.3 4.1
 -11 8 -1 -12.81 8.9
 -12 8 -1 7.5 6.53
 12 -8 1 16.48 10.47
 -12 -8 -1 7.33 5.64
 -13 8 -1 16.27 8.88
 -13 -8 -1 12.65 6.92
 13 -8 1 4.45 6.14
 -14 8 -1 36.75 13.6
 14 -8 1 38.46 17.15
 -14 -8 -1 60.21 14.25
 -15 8 -1 26 11.96
 15 -8 1 27.98 13.21
 -15 -8 -1 19.48 8.42
 -16 8 -1 48.01 15.32
 16 -8 1 43.92 17.07
 -16 -9 1 6.88 6.46
 -15 9 1 92.09 20.51
 -15 -9 1 60.76 16.25
 15 -9 -1 56.54 19.24
 -14 9 1 44.05 14.23
 -14 -9 1 37.93 12.5
 14 -9 -1 52.89 18.12
 -13 -9 1 65.75 15.93
 -13 9 1 91.02 19.3
 13 -9 -1 69.37 19.63
 -12 9 1 20.46 12.42
 -12 -9 1 15.1 8.57
 12 -9 -1 -0.06 4.29
 -11 -9 1 -2.32 4.49
 -11 9 1 12.91 10.23
 11 -9 -1 9.14 8.29
 -10 9 1 36.03 12.05
 -10 -9 1 12.04 7.08
 10 -9 -1 16.06 8.46
 -9 9 1 31.81 10.66
 -9 -9 1 44.99 11.76
 9 -9 -1 36.71 11.81
 8 -9 -1 30.69 10.86
 -8 9 1 32.72 10.58
 -8 -9 1 24.2 8.36
 -7 -9 1 -0.68 5.14
 -7 9 1 8.21 7.69
 7 -9 -1 -1.89 3.89
 -6 -9 1 9.47 4.58
 6 -9 -1 12.22 6.61
 -6 -9 1 8.07 4.61
 -5 9 1 8.85 8.44
 -5 -9 1 0.83 2.96
 5 -9 -1 1.6 3.47
 4 -9 -1 12.82 6.8
 -4 9 1 25.69 8.91
 -4 -9 1 11.47 4.54
 -3 9 1 116.66 14.01
 3 9 -1 115.5 7.68
 -3 -9 1 113.09 13.73
 3 -9 -1 104.49 15.48
 2 -9 -1 125.82 16.55
 -2 -9 1 137.41 14.89
 2 9 -1 157.35 11.1
 -2 9 1 153.08 14.91
 1 -9 -1 2.31 3.98
 -1 -9 1 9.23 4.79
 -1 9 1 3.09 3.14
 1 9 -1 16.84 4.96
 0 9 1 237.26 16.11
 0 9 -1 224.9 16.55
 0 -9 1 258.52 20.68
 0 -9 -1 221.35 21.75
 1 9 1 468.33 20.74
 -1 -9 -1 455.99 30.44
 -1 9 -1 425.35 23.91
 1 -9 1 447.79 27.12
 -2 -9 -1 496.91 32.41
 2 -9 1 507.35 29.66
 -2 9 -1 491.41 27.65
 -3 9 -1 134.63 15.3
 -3 -9 -1 114.06 8.61
 3 -9 1 121.11 14.76
 -3 -9 -1 115.73 15.89
 -4 -9 -1 57.66 11.35
 -4 9 -1 74.53 13.18
 -4 -9 -1 46.93 4.6
 4 -9 1 38.37 8.89
 5 -9 1 -0.85 2.53
 -5 -9 -1 0.82 3.85
 -6 9 -1 54.59 13.51
 6 -9 1 38.53 10.2
 -6 -9 -1 23.05 8.28
 -6 -9 -1 24.22 5.92
 -7 9 -1 21.5 6.93
 7 -9 1 46.49 11.58
 -7 -9 -1 38.5 8.13
 -8 -9 -1 1.34 3.21
 8 -9 1 5.83 5.74
 -9 -9 -1 10 5.1
 -9 9 -1 13.68 5.49
 9 -9 1 2.49 3.54
 -10 9 -1 4.94 6.45
 10 -9 1 22.74 9.66
 -10 -9 -1 5.26 5.27
 -11 -9 -1 99.71 15.64
 -11 9 -1 111.73 20.31
 11 -9 1 96.29 21.13
 -12 9 -1 26.39 10.1
 -12 -9 -1 47.2 11.5
 12 -9 1 31.74 13.19
 -13 9 -1 34.24 12.23
 -13 -9 -1 29.45 9.78
 13 -9 1 29.89 13.76
 -14 9 -1 36.26 13.21
 14 -9 1 38.82 16.4
 15 -9 1 -2.95 8.72
 -15 9 -1 28.68 11.46
 -16 -10 1 10.84 7.56
 -15 -10 1 1.23 5.09
 15 -10 -1 4.07 7.29
 -14 10 1 23.37 12.69
 -14 -10 1 6.56 6.44
 14 -10 -1 16.8 10.89
 -13 10 1 40.39 14.39
 13 -10 -1 17.18 10.71
 -13 -10 1 32.68 11.71
 -12 -10 1 29.87 11
 -12 10 1 30.85 12.48
 12 -10 -1 30.51 12.6
 -11 10 1 96.35 18.82
 -11 -10 1 57.19 13.69
 11 -10 -1 64.29 18.85
 -10 10 1 37.13 12.39
 -10 -10 1 24.5 9.8
 10 -10 -1 12.42 7
 -9 10 1 101.85 17.66
 -9 -10 1 108.46 17.22
 9 -10 -1 125.44 21.22
 -8 -10 1 203.56 22.99
 8 -10 -1 198.02 25.79
 -8 -10 1 234.8 24.23
 -8 10 1 174.94 22.64
 -7 10 1 113.57 17.84
 -7 -10 1 116.55 16.79
 -7 -10 1 107.11 16.19
 7 -10 -1 98.55 17.88
 -6 10 1 11.61 8.25
 -6 -10 1 2.76 2.82
 6 -10 -1 7.62 5.28
 -5 -10 1 7.4 4.18
 -5 10 1 20.87 9.79
 5 -10 -1 10.72 6.6
 4 10 -1 23.17 2.45
 -4 10 1 34.42 9.34
 -4 -10 1 16.7 5.78
 4 -10 -1 32.76 10.18
 3 -10 -1 66.52 13.19
 -3 -10 1 56.1 10.83
 3 10 -1 67.31 6.24
 -3 10 1 66.63 11.82
 2 10 -1 89.61 8.39
 2 -10 -1 68.71 12.89
 -2 -10 1 76.79 12.15
 -2 10 1 95.31 12.67
 1 -10 -1 279.88 25.5
 -1 -10 1 256.8 21.85
 1 10 -1 288.63 16.96
 -1 10 1 306.96 20.4
 0 10 1 363.86 21.07
 0 -10 1 321.31 24.44
 0 -10 -1 354.13 28.69
 0 10 -1 344.83 20.75
 -1 10 -1 113.52 13.01
 1 -10 1 100.08 13.87
 -1 -10 -1 106.24 15.87
 1 10 1 101.19 10.04
 2 -10 1 36.67 8.43
 -2 -10 -1 42.9 10.11
 -2 10 -1 46.01 9.61
 -3 10 -1 26.38 8.32
 -3 -10 -1 19.95 7.86
 3 -10 1 8.26 4.11
 -4 10 -1 172.96 18.66
 -4 -10 -1 180.44 21.34
 4 -10 1 156.62 18.63
 -5 10 -1 211.14 21.58
 5 -10 1 231.27 23.56
 -5 -10 -1 222.49 24.15
 -6 -10 -1 30.15 9.15
 -6 10 -1 18.63 4.83
 6 -10 1 20.44 7.83
 -7 10 -1 -0.09 7.1
 -7 -10 -1 -1.77 4.18
 -7 -10 -1 12.87 6.71
 7 -10 1 15.43 7.4
 -8 10 -1 -6.2 9.84
 -8 -10 -1 9.3 4.38
 -8 -10 -1 5.55 4.96
 8 -10 1 -0.51 4.76
 -9 10 -1 52.37 12.69
 9 -10 1 53.13 14.91
 -9 -10 -1 47.46 10.24
 -10 -10 -1 11.56 5.36
 10 -10 1 95.88 20.07
 -10 10 -1 72.63 15.22
 -11 10 -1 23.82 11.42
 -11 -10 -1 2.8 4.02
 11 -10 1 7.43 7.37
 -12 10 -1 11.15 10.04
 12 -10 1 -1.33 6.86
 13 -10 1 10.52 8.69
 -13 10 -1 8.58 7.06
 -14 10 -1 1.4 6.38
 14 -10 1 1.72 7.94
 -15 10 -1 5.87 10.05
 15 -10 1 -18.23 11.67
 -15 -11 1 -3.43 7.78
 14 -11 -1 1.03 6.58
 -14 -11 1 -4.99 6.73
 -13 -11 1 -5.01 4.97
 13 -11 -1 -6.56 8.71
 12 -11 -1 10.5 8.71
 -12 -11 1 18.19 9.81
 -12 11 1 42.2 13.32
 -11 11 1 17.6 10.1
 11 -11 -1 6.56 7.7
 -11 -11 1 -3.18 6.15
 -10 11 1 29.59 10.78
 -10 -11 1 27.49 9.49
 10 -11 -1 42.18 13.11
 -9 -11 1 1.23 4.73
 -9 11 1 24.62 9.83
 -9 -11 1 3.44 3.95
 9 -11 -1 12.17 10.3
 -8 -11 1 4.01 3.67
 8 -11 -1 2.09 3.92
 -8 11 1 9.05 8.56
 -8 -11 1 -4.18 5.31
 7 -11 -1 -1.79 4.51
 -7 -11 1 2.54 3.74
 -7 11 1 11.99 7.96
 -6 11 1 113.88 17.56
 6 -11 -1 150.25 21.78
 -6 -11 1 122.78 17.02
 5 -11 -1 27.25 9.5
 -5 11 1 60.84 12.65
 -5 -11 1 37.79 9.27
 -4 -11 1 5.77 4.41
 -4 11 1 3.37 6.35
 4 -11 -1 5.97 5.44
 3 -11 -1 130.07 18.78
 -3 11 1 107.07 14.96
 -3 -11 1 116.93 15.5
 3 11 -1 121.88 8.63
 2 -11 -1 135.15 18.59
 2 11 -1 135.66 10.99
 -2 11 1 146.87 15.8
 -2 -11 1 141.3 17.14
 1 -11 -1 48.97 11.56
 -1 11 1 64.29 10.11
 -1 -11 1 47.4 10.13
 1 11 -1 63.57 8.59
 0 11 1 151.05 14.07
 0 -11 -1 153.15 19.63
 0 -11 1 152.07 17.63
 0 11 -1 136.17 13.43
 1 -11 1 23.47 7.01
 1 11 1 16.77 4.06
 -1 -11 -1 17.1 7.42
 -1 11 -1 16.45 4.92
 -2 11 -1 55.66 9.01
 -2 -11 -1 66.46 13.32
 2 -11 1 75.74 12.7
 -3 -11 -1 -0.41 4.27
 3 -11 1 9.97 5.72
 -3 11 -1 9.25 3.95
 4 -11 1 0.8 2.51
 -4 11 -1 -7.38 8.13
 -4 -11 -1 2.89 4.35
 -5 -11 -1 1.71 3.21
 5 -11 1 -3.04 4.49
 -6 -11 -1 23.2 8.32
 6 -11 1 17.81 7.8
 -6 11 -1 10.37 7.25
 -7 11 -1 50.02 11.8
 -7 -11 -1 52.52 13.41
 7 -11 1 41.35 11.89
 8 -11 1 0.91 3.15
 -8 11 -1 -7.18 6.72
 -8 -11 -1 -6.86 5.87
 9 -11 1 199.51 27.82
 -9 -11 -1 230.74 28.92
 -9 -11 -1 202.51 20.78
 -9 11 -1 195.76 25.46
 -10 11 -1 70.64 16.45
 10 -11 1 103.44 21.72
 -11 11 -1 27.47 10.53
 11 -11 1 39.1 13.67
 -12 11 -1 19.22 9.54
 12 -11 1 54.02 17.94
 -13 11 -1 4.33 9.14
 13 -11 1 -1.11 7.67
 -14 11 -1 15.5 9.7
 14 -11 1 3.32 8.41
 -14 -12 1 2.09 4.48
 13 -12 -1 -2.71 7.17
 -13 -12 1 -0.05 4.04
 12 -12 -1 11.5 9.83
 -12 12 1 25.69 11.75
 -12 -12 1 7.41 5.55
 -12 -12 1 -11.26 9.17
 -11 -12 1 0.16 7.1
 -11 -12 1 8.22 5.83
 11 -12 -1 14.67 8.67
 -10 -12 1 47.81 13.09
 -10 -12 1 36.65 11.39
 -10 12 1 49.3 15.66
 10 -12 -1 38.1 12.44
 -9 -12 1 23.43 9.16
 -9 12 1 22.85 10.01
 -9 -12 1 20.32 8.62
 9 -12 -1 32.48 11.92
 -8 12 1 61.09 14.77
 8 -12 -1 31.76 11.33
 -8 -12 1 26.57 8.93
 7 -12 -1 2.96 6.19
 -7 -12 1 1.93 4.63
 -6 12 1 30.28 10.47
 -6 -12 1 13.56 6.03
 6 -12 -1 15.3 8.66
 5 -12 -1 -1.66 3.52
 -5 -12 1 4.91 4.41
 -4 12 1 70.29 13.49
 -4 -12 1 49.44 10.89
 4 -12 -1 46.61 12.13
 3 -12 -1 16.21 7.93
 -3 12 1 16.37 7.53
 -3 -12 1 7.52 4.29
 -2 12 1 80.85 12.74
 2 -12 -1 77.45 15.51
 2 12 -1 92.42 9.42
 -2 -12 1 82.06 13.71
 -1 -12 1 174.04 19.96
 1 -12 -1 149.75 20.51
 -1 12 1 170.93 16.54
 1 12 -1 173.74 14.56
 0 12 -1 103.23 12.12
 0 -12 -1 113.19 17.95
 0 -12 1 107.79 15.61
 0 12 1 81.79 10.75
 -1 12 -1 20.94 6.68
 -1 -12 -1 18.98 7.75
 1 -12 1 18.79 7.14
 1 12 1 8.24 3.28
 2 -12 1 3.93 3.92
 -2 -12 -1 -1.92 4.45
 -2 12 -1 -4.22 4.95
 -3 -12 -1 60.97 13.71
 3 -12 1 51.13 11.73
 -3 12 -1 41.74 9.54
 -4 12 -1 27.97 7.47
 -4 -12 -1 27.19 8.88
 4 -12 1 32.03 9.2
 -5 12 -1 26.85 9.73
 -5 -12 -1 21.92 8.68
 5 -12 1 16.81 7.3
 -6 12 -1 15.54 6.66
 -6 -12 -1 19.69 8.96
 6 -12 1 25.75 9.28
 -7 12 -1 19.94 8.33
 -7 -12 -1 25.95 9.84
 7 -12 1 23.72 9.44
 -8 -12 -1 -1.11 4.63
 -8 12 -1 0.77 6.15
 8 -12 1 -4.17 6.7
 -9 12 -1 -6.79 8.72
 -9 -12 -1 -1.74 4.41
 9 -12 1 -0.99 4.15
 -10 12 -1 2.52 7.95
 -10 -12 -1 3.09 4.3
 -11 12 -1 9.93 9.12
 -11 -12 -1 15.69 9.47
 11 -12 1 17.32 9.84
 -12 12 -1 23.55 11.4
 -12 -12 -1 27.62 13.14
 12 -12 1 53.44 17.78
 13 -12 1 41.1 15.22
 -13 12 -1 30.12 13.51
 14 -12 1 70.2 26.59
 -13 -13 1 -3.58 4.78
 -13 -13 1 -3.75 4.2
 -12 13 1 24.75 10.57
 -12 -13 1 18.27 8.71
 -12 -13 1 12.4 7.12
 12 -13 -1 14.13 9.65
 -11 -13 1 4 5.32
 -11 13 1 22.39 11.51
 -11 -13 1 12.11 7.14
 11 -13 -1 10.39 8.28
 10 -13 -1 0.56 4.71
 -10 -13 1 1.26 4.3
 -9 13 1 46.35 14.94
 -9 -13 1 35.92 11.72
 9 -13 -1 46.09 14.23
 -8 13 1 116.66 19.82
 -8 -13 1 110.76 18.52
 8 -13 -1 117.82 22.45
 7 -13 -1 10.09 7.19
 -7 13 1 18.73 9.94
 -7 -13 1 20.59 7.93
 -6 13 1 82.82 16.13
 -6 -13 1 61.35 12.95
 6 -13 -1 64.63 15.58
 5 -13 -1 58.1 14.52
 -5 13 1 70.66 14.42
 -5 -13 1 57.56 12.61
 -4 13 1 85.5 14.9
 -4 -13 1 81.46 14.59
 4 -13 -1 113.11 19.54
 -3 13 1 21.47 7.39
 -3 -13 1 9.79 5.2
 3 -13 -1 11.55 7.03
 2 -13 -1 85.21 15.94
 -2 13 1 100.25 14.01
 -2 -13 1 75.61 13.81
 1 -13 -1 20.7 8.18
 -1 -13 1 18.87 7.15
 -1 13 1 28.92 7.85
 0 13 -1 90.45 11.9
 0 -13 1 100.1 15.95
 0 13 1 84.49 11.16
 0 -13 -1 75.97 15.45
 -1 -13 -1 492.9 38.66
 -1 13 -1 520.69 30.16
 1 -13 1 521.84 36.78
 2 -13 1 234.27 25.09
 -2 -13 -1 229.26 26.84
 -2 13 -1 235.98 21.46
 -3 13 -1 225.92 22.58
 -3 -13 -1 212.53 25.66
 3 -13 1 201.55 23.72
 -4 -13 -1 -2.37 4.5
 4 -13 1 4.17 4.85
 5 -13 1 4.77 5.73
 -5 13 -1 23.12 9.46
 -5 -13 -1 11.28 6.96
 -6 13 -1 -1.92 6.48
 6 -13 1 3.97 3.91
 -6 -13 -1 9.17 6.41
 -7 -13 -1 32.19 11
 -7 13 -1 50.11 13.3
 7 -13 1 51.15 14.16
 -8 13 -1 -8.82 6.63
 -8 -13 -1 6.48 4.58
 8 -13 1 14.3 7.95
 -9 13 -1 60.24 14.62
 -9 -13 -1 18.43 8.89
 9 -13 1 34.66 12.86
 -10 -13 -1 54.6 15.31
 -10 13 -1 42.27 13.23
 10 -13 1 36.75 13.44
 -11 13 -1 32.45 12.28
 -11 -13 -1 68.99 18.2
 11 -13 1 31.19 13.84
 -12 13 -1 62.14 16.59
 -12 -13 -1 80.78 20.14
 12 -13 1 73.63 20.11
 -13 -13 -1 1.32 6.14
 13 -13 1 2.07 4.27
 -12 -14 1 65.06 16.74
 -12 14 1 76.49 18.67
 -11 14 1 57.22 15.89
 -11 -14 1 72.48 17.6
 11 -14 -1 63.22 18.5
 -10 14 1 57.42 16.79
 -10 -14 1 43 13.54
 10 -14 -1 62.59 17.5
 -9 14 1 15.96 9.66
 -9 -14 1 6.21 4.02
 9 -14 -1 16.21 10.82
 8 -14 -1 34.15 13.4
 -8 14 1 26.57 11.17
 -8 -14 1 19.42 8.49
 7 -14 -1 3.24 6.26
 -7 14 1 8.41 8.25
 -7 -14 1 5.6 5.15
 6 -14 -1 3.41 3.52
 -6 -14 1 -4.46 5.33
 -5 14 1 9.92 8.51
 5 -14 -1 1.29 3.96
 -5 -14 1 -1.15 3.92
 -4 14 1 58.29 13.13
 -4 -14 1 30.83 9.26
 4 -14 -1 48.94 14.24
 3 -14 -1 3.12 4.75
 -3 14 1 1.09 3.82
 -3 -14 1 -0.68 4.96
 2 -14 -1 76.56 16.17
 -2 -14 1 65.15 13.42
 -2 14 1 68.46 12.23
 1 -14 -1 152.32 22.7
 -1 -14 1 138.18 19.36
 -1 14 1 171.42 17.84
 0 -14 -1 225.29 27.63
 0 -14 1 197.01 23.25
 1 -14 1 89.63 16.09
 -1 14 -1 82.08 12.39
 -1 -14 -1 112.89 20.57
 -2 -14 -1 1.3 4.15
 -2 14 -1 17.19 7.63
 2 -14 1 6.75 5.77
 -3 14 -1 9.53 9.8
 3 -14 1 6.66 4.31
 -3 -14 -1 0.41 3.21
 -4 14 -1 150.24 19.85
 4 -14 1 139.9 21.12
 -4 -14 -1 141.82 22.29
 5 -14 1 228.28 27.85
 -5 -14 -1 235.15 29.03
 -5 14 -1 236.05 25.83
 -6 14 -1 104.66 17.84
 6 -14 1 91.48 18.38
 -6 -14 -1 91.52 18.1
 -7 14 -1 99.87 18.34
 7 -14 1 111.85 21.44
 -7 -14 -1 95.85 18.81
 -8 14 -1 36.63 12.23
 -8 -14 -1 35.92 11.92
 8 -14 1 36.38 12.61
 -9 14 -1 -5.84 7.78
 -9 -14 -1 -1.84 4.63
 9 -14 1 -8.26 8.68
 -10 14 -1 5.96 8.26
 -10 -14 -1 3.23 6.51
 10 -14 1 8.89 8.84
 -11 -14 -1 8.16 7.95
 11 -14 1 -3.48 7.3
 -11 14 -1 -4.62 7.58
 -12 -14 -1 0.82 4.48
 12 -14 1 2.52 6.92
 -11 15 1 53.98 15.33
 -10 15 1 50.05 15.04
 -10 -15 1 22.25 8.87
 10 -15 -1 47.01 17.07
 -9 15 1 55.88 15.64
 -9 -15 1 79.9 17.9
 9 -15 -1 123.56 24.76
 -8 15 1 60.95 16.03
 -8 -15 1 45.64 13.19
 8 -15 -1 39.63 14.8
 7 -15 -1 25.33 10.43
 -7 15 1 37.62 12.1
 -7 -15 1 36.67 11.98
 6 -15 -1 174.43 26.81
 -6 -15 1 98.67 17.79
 -6 15 1 140.72 20.68
 5 -15 -1 61.48 15.92
 -5 15 1 64.87 14.57
 -5 -15 1 48.33 12.44
 -4 -15 1 141.92 20.85
 4 -15 -1 200.5 27.91
 -4 15 1 191.23 22.44
 -3 15 1 147.38 19
 -3 -15 1 133.29 20.14
 3 -15 -1 142.7 23.28
 2 -15 -1 4.59 4.84
 -2 -15 1 2.89 3.99
 -2 15 1 4.11 4.05
 1 -15 -1 30.25 11.17
 -1 -15 1 52.58 13.14
 0 -15 1 219.2 25.5
 0 -15 -1 193.04 26.71
 1 -15 1 136.75 20.54
 -1 -15 -1 200.66 27.43
 -2 15 -1 179.71 19.89
 2 -15 1 142.26 21.2
 -2 -15 -1 160.5 23.89
 -3 15 -1 304.58 27.17
 3 -15 1 315.06 31.97
 -3 -15 -1 265.22 31.33
 -4 15 -1 50.54 12.79
 -4 -15 -1 36.7 11.66
 4 -15 1 18.79 7.46
 5 -15 1 18.01 8.89
 -5 -15 -1 9.56 7.82
 -5 15 -1 14.25 7.35
 -6 15 -1 5.82 7.77
 -6 -15 -1 1.86 5.62
 6 -15 1 -0.86 5.34
 7 -15 1 31.75 12.41
 -7 -15 -1 38.99 12.45
 -7 15 -1 43.72 13.32
 -8 -15 -1 10.09 7.51
 8 -15 1 -1.26 3.92
 -9 15 -1 70.26 16.77
 -9 -15 -1 47.14 15.42
 9 -15 1 44.53 14.91
 -10 15 -1 62.99 16.39
 -10 -15 -1 19.76 10.03
 10 -15 1 43.17 15.79
 -11 15 -1 32.9 13.55
 -11 -15 -1 40.76 15.19
 11 -15 1 8.45 7.15
 -10 16 1 72.34 18.39
 -9 16 1 19.6 10.44
 9 -16 -1 18.33 10.5
 -8 16 1 20.58 11.45
 8 -16 -1 33.76 13.65
 7 -16 -1 3.69 7.12
 -7 -16 1 2.7 3.28
 -7 16 1 9.07 8.59
 -6 16 1 -5.12 6.18
 -6 -16 1 7.87 5.89
 6 -16 -1 0.4 4.2
 5 -16 -1 -5.42 6.61
 -5 -16 1 -2.9 4.48
 -5 16 1 -0.61 5.31
 -4 -16 1 18.8 7.81
 4 -16 -1 16.19 8.12
 -4 16 1 23.24 9.06
 -3 -16 1 13.85 7.59
 3 -16 -1 9.06 8.48
 2 -16 -1 143.04 23.94
 -2 -16 1 134.84 21
 1 -16 -1 200.5 27.98
 -1 -16 1 238.27 28.28
 0 -16 1 64.71 14.19
 0 -16 -1 73.68 17.86
 -1 -16 -1 89.72 19.11
 1 -16 1 75.55 15.87
 -2 -16 -1 -1.98 5.57
 2 -16 1 8.32 5.98
 -3 -16 -1 32.39 12.38
 3 -16 1 25.36 10.01
 4 -16 1 97.41 18.99
 -4 16 -1 130.96 19.45
 -4 -16 -1 115.47 21.76
 5 -16 1 178.44 26.45
 -5 -16 -1 226.62 30.58
 -5 16 -1 234.66 26.93
 6 -16 1 92.28 19.76
 -6 16 -1 64.73 14.68
 -6 -16 -1 103.11 20.81
 -7 16 -1 98.8 19.5
 -7 -16 -1 89.06 19.97
 7 -16 1 120.62 23.19
 -8 16 -1 9.83 7.1
 -8 -16 -1 9.5 9.06
 8 -16 1 9.97 8.22
 -9 16 -1 1.56 7.02
 -9 -16 -1 0.01 5.23
 9 -16 1 0.69 6.66
 -10 16 -1 11.31 10.74
 -10 -16 -1 11.51 6.85
 10 -16 1 21.9 13.66
 -9 17 1 52.13 16.18
 -8 17 1 16.31 9.69
 7 -17 -1 17.53 8.59
 -7 17 1 11.46 8.05
 -6 17 1 45.54 13.53
 6 -17 -1 44.25 14.2
 -5 -17 1 6.62 4.77
 5 -17 -1 15.34 9.39
 -4 -17 1 62.84 15.36
 4 -17 -1 41.97 14.23
 -3 -17 1 27.22 9.93
 3 -17 -1 21.29 9.8
 -2 -17 1 3.35 4.96
 2 -17 -1 -1.02 4.93
 -1 -17 1 39.57 13.44
 1 -17 -1 13.19 9.19
 0 -17 -1 32.46 11.29
 0 -17 1 34.63 11.09
 -1 -17 -1 146.86 24.32
 1 -17 1 150.41 23.7
 2 -17 1 403.87 38.54
 -2 -17 -1 375.07 39.84
 -3 -17 -1 308.95 36.02
 3 -17 1 293.79 33.1
 4 -17 1 50.43 14.5
 -4 -17 -1 47.11 14.86
 -5 -17 -1 -1.23 4.34
 5 -17 1 5.49 4.52
 -6 17 -1 12.46 8.15
 -6 -17 -1 0.64 5.26
 6 -17 1 12.08 7.04
 -7 17 -1 19.06 9.55
 -7 -17 -1 22.98 10.31
 7 -17 1 45.2 14.81
 -8 -17 -1 29.3 12.4
 -8 17 -1 22.67 11.92
 8 -17 1 12.71 7.44
 -9 17 -1 51.64 16.66
 9 -17 1 24.71 12.31
 5 -18 -1 -1.42 4.26
 4 -18 -1 3.48 5.84
 3 -18 -1 10.96 8.41
 -2 -18 1 97.48 19.06
 2 -18 -1 117.91 23.13
 1 -18 -1 127.38 23.96
 -1 -18 1 155.87 24.25
 0 -18 -1 110.39 22.32
 0 -18 1 74.74 16.87
 -1 -18 -1 74.94 18.76
 1 -18 1 61.75 15.96
 -2 -18 -1 -4.24 5.51
 2 -18 1 2.48 4.57
 3 -18 1 5.13 7.11
 -3 -18 -1 3.26 6.36
 4 -18 1 3.87 6.5
 -4 -18 -1 15.33 8.96
 -5 -18 -1 47.62 15.21
 5 -18 1 36.69 12.85
 6 -18 1 23.11 10.68
 -6 -18 -1 13.84 9.06
 -7 -18 -1 8.16 5.44
 7 -18 1 28.36 12.3
 2 -19 -1 16.58 9.9
 1 -19 -1 23.32 11.03
 0 -19 -1 22.39 10.47
 -1 -19 -1 38.46 14
 2 -19 1 41.17 12.87
 -2 -19 -1 49.05 15.23
 -3 -19 -1 11.2 7.59
 3 -19 1 15.78 8.85
 4 -19 1 -1.77 4.01
 18 0 -2 0.95 6.03
 -17 0 2 12.24 6.45
 17 0 -2 9.97 9.33
 -16 0 2 22.78 8.52
 16 0 -2 25.17 12.86
 -15 0 2 70.8 14.74
 15 0 -2 83.33 21.12
 -14 0 2 205.74 23.74
 14 0 -2 200.99 30.86
 -13 0 2 91.69 15.47
 13 0 -2 85.24 18.9
 12 0 -2 624.46 48.56
 -12 0 2 524.11 34.89
 -11 0 2 73.83 12.88
 11 0 -2 76.25 16.52
 -10 0 2 123.61 15.34
 10 0 -2 97.26 17.49
 -9 0 2 -6.44 5.53
 9 0 -2 7.93 5.54
 8 0 -2 573.14 37.07
 -8 0 2 619.87 31.01
 -7 0 2 366.54 22.63
 7 0 -2 374.31 27.77
 -6 0 2 1696.27 45.56
 6 0 -2 1742.25 53.02
 5 0 -2 688.07 29.5
 -5 0 2 627.64 22.25
 -4 0 2 17.94 3.96
 -4 0 2 21.84 4.32
 4 0 -2 22.5 4.75
 -3 0 2 562.18 20.53
 -3 0 2 545.56 19.14
 3 0 -2 564.38 19.99
 2 0 -2 24.09 3.45
 -2 0 2 28.47 4.97
 -2 0 2 25.94 3.84
 -2 0 2 25.56 5.59
 -1 0 2 111.19 9.29
 -1 0 2 97.45 7.95
 -1 0 2 95.05 6.52
 1 0 -2 95.2 8.55
 1 0 -2 91.26 6.55
 0 0 -2 717.01 19.66
 0 0 -2 745.14 18.03
 0 0 -2 765.85 25.97
 0 0 2 791.5 24.18
 -1 0 -2 27.27 5.68
 1 0 2 24.17 4.9
 2 0 2 469.9 23.78
 3 0 2 1958.88 52.48
 4 0 2 1734.69 52.36
 5 0 2 470.11 29.15
 6 0 2 663.31 36.3
 7 0 2 217.47 21.47
 8 0 2 67.47 13.16
 9 0 2 364.56 34.63
 9 0 2 433.7 33.49
 -9 0 -2 410.49 27.24
 10 0 2 310 29.82
 -10 0 -2 308.26 24.69
 11 0 2 46.79 13.2
 -11 0 -2 35.49 9.56
 -12 0 -2 559.19 35.64
 12 0 2 632.49 45.69
 13 0 2 171.64 25.05
 -13 0 -2 168.21 20.41
 14 0 2 30.64 11.61
 -14 0 -2 24.97 9.74
 15 0 2 33.97 11.66
 -15 0 -2 19.74 6.69
 -16 0 -2 7.12 5.91
 16 0 2 1.89 4.33
 -17 0 -2 24.29 9.84
 17 0 2 19.41 10.17
 18 0 2 20.84 12.33
 18 -1 -2 6.74 9.33
 18 1 -2 -0.55 5.42
 -17 1 2 122.88 21.1
 17 1 -2 100.88 25.31
 17 -1 -2 114.46 26.57
 -16 -1 2 108.34 18.03
 -16 1 2 125.35 20.6
 16 1 -2 145.03 28.33
 16 -1 -2 117.94 25.76
 -15 -1 2 30.38 9.03
 15 1 -2 36.05 14.14
 15 -1 -2 41 15.01
 -15 1 2 50.72 12.42
 -14 1 2 150.12 21.07
 -14 -1 2 153.35 20.06
 14 1 -2 191.63 29.83
 14 -1 -2 166.59 28.07
 -13 1 2 3.34 5.59
 -13 -1 2 2.36 4.35
 13 1 -2 19.22 10.43
 13 -1 -2 8.23 8.92
 -12 1 2 22.3 8.38
 12 1 -2 12.3 8.32
 12 -1 -2 12.71 6.65
 -12 -1 2 17.08 7.09
 -11 1 2 158.35 18.85
 11 -1 -2 203.78 26.84
 11 1 -2 197.2 25.79
 -11 -1 2 184.43 19.28
 -10 1 2 950.51 43.48
 -10 -1 2 888.35 39.58
 10 1 -2 977.64 53.89
 10 -1 -2 927.52 53.91
 -9 1 2 318.39 24.54
 -9 -1 2 320.75 22.45
 9 1 -2 309.31 28.5
 9 -1 -2 326.63 29.8
 -8 1 2 776.1 35.96
 8 1 -2 796.75 43.13
 8 -1 -2 787.92 43.2
 -8 -1 2 762.05 32.78
 -7 -1 2 4.35 3.04
 7 1 -2 14.61 6.56
 7 -1 -2 9.53 4.97
 -7 1 2 9.17 3.24
 -6 1 2 136.19 9.97
 6 1 -2 170.63 16.96
 6 -1 -2 140.07 15.22
 -6 1 2 131.85 13.34
 5 1 -2 541.87 26.79
 -5 1 2 549.42 25.55
 -5 1 2 528.14 19.62
 5 -1 -2 564.45 27.03
 -4 1 2 34.08 5.18
 -4 -1 2 39.66 5.69
 4 1 -2 36.34 6.09
 4 -1 -2 34.61 6.05
 3 -1 -2 19.67 4.46
 -3 -1 2 17.19 3.11
 -3 1 2 14.11 3.49
 -3 -1 2 19.61 4.22
 -3 -1 2 23.85 6.01
 3 1 -2 18.44 3.64
 -3 1 2 21.71 4.37
 -2 -1 2 13.75 4.3
 -2 -1 2 10.15 1.92
 2 1 -2 9.97 2.21
 -2 -1 2 11.85 3.37
 -2 1 2 10.85 3.13
 2 -1 -2 13.73 3.47
 2 -1 -2 8.51 2.18
 -1 1 2 57.59 6.07
 -1 -1 2 124.24 11.89
 1 1 -2 53.58 6.54
 1 1 -2 62.26 3.83
 1 -1 -2 73.15 7.31
 -1 1 2 75.58 7.35
 -1 -1 2 61.44 3.85
 1 -1 -2 82.33 7.74
 0 -1 -2 1104.6 21.28
 0 1 2 1121.5 22.45
 0 1 -2 1275.11 31.89
 0 -1 -2 1261.12 28.74
 0 1 -2 1172.71 17.56
 0 1 2 1200.41 31.61
 0 -1 -2 1169.05 31.93
 1 -1 2 9814.11 86.2
 -1 1 -2 9999 79.55
 -1 -1 -2 9438.05 59.94
 1 1 2 9885.66 99.94
 -2 1 -2 2295.94 45.41
 2 -1 2 2242.07 52.48
 2 1 2 2231.03 51.21
 2 -1 2 2195.97 40.7
 -3 1 -2 627.11 27.29
 3 -1 2 589.49 21.33
 3 -1 2 548.98 28
 3 1 2 612.56 29.02
 4 -1 2 248.41 19.38
 4 -1 2 275.4 20.76
 4 1 2 260.24 20.61
 4 -1 2 260.43 14.2
 5 -1 2 486.4 19.52
 5 -1 2 492.68 30.18
 5 -1 2 547.26 31.33
 6 -1 2 425.44 18.21
 6 -1 2 420.58 30.35
 6 -1 2 455.17 30.06
 7 -1 2 460.05 19.07
 7 -1 2 413.41 32.26
 7 -1 2 433.23 30.73
 8 -1 2 293.4 15.35
 -8 1 -2 324.6 23.8
 8 -1 2 283.24 28.7
 8 -1 2 305.32 26.93
 9 -1 2 52.8 12.17
 -9 -1 -2 24.62 6.36
 9 1 2 64.56 14.73
 9 -1 2 43.1 6.24
 -9 1 -2 34.78 8.01
 9 -1 2 42.99 12.43
 10 -1 2 170.07 11.55
 10 -1 2 148.64 23.21
 10 -1 2 155.83 21.22
 10 1 2 156.23 22.07
 -10 -1 -2 155.96 16.99
 -10 1 -2 164.7 18.81
 11 -1 2 2.73 4.76
 11 1 2 2.41 7.52
 -11 -1 -2 -0.36 2.92
 11 -1 2 1.78 5.44
 -11 1 -2 4.09 4.35
 11 -1 2 3.51 2.56
 -12 -1 -2 19.25 7.46
 12 -1 2 13.9 8.55
 12 1 2 24.28 10.79
 -12 1 -2 28.23 9.24
 12 -1 2 8.46 6.48
 -13 1 -2 139 19.14
 13 -1 2 162.03 27.62
 13 1 2 151.91 23.76
 -13 -1 -2 145.47 18.46
 13 -1 2 140.72 22.83
 14 -1 2 -6.19 9.84
 14 -1 2 -2.93 4.56
 -14 1 -2 8.21 5.78
 -14 -1 -2 5.54 6.52
 14 1 2 5.96 6.08
 15 1 2 13.79 9.27
 -15 -1 -2 -6.56 6.58
 -15 1 -2 -3.85 4.16
 15 -1 2 -2.44 6.36
 -16 -1 -2 22.14 7.86
 16 1 2 40.91 15.03
 -16 1 -2 39.54 11.24
 16 -1 2 21.89 9.55
 17 1 2 45.67 15.81
 -17 1 -2 55.81 13.81
 17 -1 2 38.03 13.7
 -18 1 -2 29.55 11.49
 18 -1 2 22.11 11.29
 18 1 2 32.51 15.5
 -18 2 2 -5.5 6.45
 18 -2 -2 -9.65 9.38
 -17 2 2 41.84 13.23
 17 -2 -2 25.95 12.73
 16 -2 -2 -2.23 4.06
 16 2 -2 2.29 6.98
 -16 2 2 4.45 6.01
 -15 -2 2 42.53 10.91
 -15 2 2 64.89 14.68
 15 2 -2 50.11 15.58
 15 -2 -2 53.61 16.67
 -14 -2 2 83.53 13.79
 -14 2 2 82.97 16.27
 14 -2 -2 102.9 22.69
 14 2 -2 82.94 21.39
 -13 -2 2 52.64 10.69
 13 2 -2 58.43 16.42
 13 -2 -2 59.42 16.61
 -13 2 2 52.65 12.41
 12 -2 -2 297.2 34.72
 12 2 -2 290.18 33.8
 -12 2 2 293.16 27.52
 -12 -2 2 265.99 22.77
 -11 -2 2 -4.77 6.82
 11 -2 -2 4.33 4.06
 -11 2 2 0.9 5.73
 11 2 -2 4.14 5.65
 11 -2 -2 -1.59 5.52
 -10 2 2 146.37 17.94
 -10 -2 2 111.1 13.17
 10 2 -2 107.54 18.24
 10 -2 -2 120.03 19.59
 -9 -2 2 16.85 4.99
 -9 2 2 42.18 9.74
 9 2 -2 34.54 10.44
 9 -2 -2 37.15 10.36
 -8 -2 2 450.13 24.11
 8 -2 -2 485.56 33.85
 -8 2 2 496.05 29.83
 8 2 -2 454.42 32.39
 -7 2 2 5.93 2.18
 -7 2 2 17.57 6.73
 7 -2 -2 5.77 4.28
 7 2 -2 3.86 2.94
 -6 2 2 550.59 28.36
 6 2 -2 500.94 29.04
 -6 2 2 544.92 19.38
 6 -2 -2 525.92 29.46
 -5 2 2 282.33 14.11
 5 2 -2 268.22 18.56
 5 -2 -2 288.32 19.99
 -5 2 2 285.05 19.24
 4 -2 -2 29.25 6.07
 4 2 -2 25.3 5.15
 -4 2 2 26.87 4.76
 -4 2 2 15.61 4.05
 -4 -2 2 23.28 6.51
 -4 -2 2 24.04 4.54
 -3 -2 2 455.7 15.34
 3 2 -2 469.99 17.79
 3 -2 -2 450.12 21.15
 -3 -2 2 446.09 22.01
 2 -2 -2 49.97 6.8
 2 2 -2 51.22 4.37
 -2 -2 2 50.68 3.47
 -2 2 2 53.17 7.03
 -2 -2 2 65.78 8.3
 -1 -2 2 1367.16 35.33
 -1 2 2 1335.45 33.95
 -1 -2 2 1319.16 33.88
 1 -2 -2 1265.34 32.75
 -1 2 2 1268.69 28.39
 0 -2 -2 367.1 17.84
 0 2 2 304.88 9.78
 0 2 2 304.56 16
 0 2 2 342.77 16.77
 -1 2 -2 5333.5 49.96
 -1 -2 -2 5054.28 33.04
 1 -2 2 5286.3 66.15
 -1 -2 -2 5307.59 67.35
 2 -2 2 211.45 13.03
 -2 2 -2 186.83 12.27
 2 -2 2 209.19 13.58
 3 -2 2 1166.57 37
 3 -2 2 1117.87 29.97
 -3 2 -2 1104.3 34.68
 4 -2 2 660.77 22.6
 4 -2 2 737.49 34.52
 4 -2 2 700.08 32.47
 5 -2 2 678.14 35.19
 5 -2 2 602.41 21.65
 5 -2 2 685.06 35.18
 6 -2 2 661.77 38.12
 6 -2 2 543.23 20.59
 6 -2 2 664.38 36.19
 7 -2 2 11.39 3.17
 7 -2 2 13.38 6.09
 7 -2 2 -0.66 4.03
 8 -2 2 108.01 17.47
 -8 2 -2 78.56 12.05
 8 -2 2 108.71 9.21
 8 -2 2 97.01 15.51
 -9 -2 -2 32.3 6.84
 9 -2 2 50.4 6.06
 -9 2 -2 42.06 9.2
 9 -2 2 52.83 13.6
 9 -2 2 43.18 11.26
 -10 2 -2 114 15.94
 10 -2 2 126.9 9.46
 10 -2 2 112.2 20.03
 -10 -2 -2 107.47 13.61
 10 -2 2 98.42 17.16
 -11 -2 -2 0.46 2.96
 -11 2 -2 7.42 6.73
 11 -2 2 -1.44 4
 12 -2 2 220.84 31.58
 12 -2 2 221.16 27.15
 -12 -2 -2 247.72 22.54
 -12 2 -2 249.32 25.15
 13 2 2 53.75 15.79
 -13 -2 -2 46.06 10.97
 13 -2 2 38.8 15.44
 13 -2 2 48.22 13.04
 -13 2 -2 44.51 11.76
 14 2 2 21.09 9.98
 -14 -2 -2 33.43 9.92
 14 -2 2 20.42 11.87
 -14 2 -2 30.07 10.61
 14 -2 2 17.3 7.68
 -15 -2 -2 47.86 11.25
 15 -2 2 76.21 21.85
 -15 2 -2 27.77 9.61
 15 2 2 49.43 15.23
 15 -2 2 49.94 14.64
 16 -2 2 -1.51 5.19
 16 2 2 0.83 5.92
 -16 2 -2 -7.04 6.34
 16 -2 2 -4.79 7.85
 -17 2 -2 4.45 5.54
 17 2 2 7.6 8.63
 17 -2 2 -2.36 7.89
 -18 2 -2 19.74 9.97
 18 2 2 21.61 12.05
 -18 3 2 -2.8 6.76
 -17 3 2 72.38 16.98
 17 -3 -2 44.7 17.84
 -16 3 2 64.15 15.62
 16 -3 -2 42.46 15.46
 -15 3 2 15.31 9.48
 15 -3 -2 10.36 9.2
 -14 3 2 95.77 17.55
 14 -3 -2 73.18 19.42
 -13 -3 2 0.16 3
 13 -3 -2 4.18 5.94
 -13 3 2 17.15 9.37
 -12 -3 2 -6.61 5.02
 -12 3 2 3.5 7.48
 12 3 -2 1.19 4.54
 12 -3 -2 -0.48 5.33
 11 3 -2 88 17.8
 11 -3 -2 103.38 19.93
 -11 3 2 121.53 18.33
 -11 -3 2 89.83 11.91
 -10 3 2 188.83 20.81
 10 3 -2 161.7 22.18
 10 -3 -2 230.96 27.06
 10 -3 -2 185.69 12.71
 9 3 -2 57.19 12.65
 -9 3 2 106.43 15.22
 9 -3 -2 51.6 12.37
 9 -3 -2 61.34 6.49
 -8 3 2 351.7 25.5
 8 -3 -2 303.74 26.86
 8 3 -2 264.25 25.03
 -8 3 2 324.27 14.31
 8 -3 -2 270.81 11.15
 7 3 -2 291.77 24.2
 -7 3 2 329.21 14.79
 7 -3 -2 326.12 25.79
 -7 3 2 329.08 23.71
 -6 3 2 678.24 32.56
 -6 -3 2 673.02 32.9
 6 3 -2 617.46 31.88
 -6 3 2 633.64 21.12
 6 -3 -2 626.93 33.4
 -5 3 2 355.22 22.75
 5 -3 -2 345.16 22.77
 -5 -3 2 365.73 23.2
 4 -3 -2 8.13 3.34
 -4 3 2 4.86 3.44
 -4 -3 2 11.57 5.66
 -4 -3 2 16.18 4.3
 -3 3 2 54.55 7.83
 -3 -3 2 40.11 4.96
 -3 -3 2 37.14 7.15
 3 -3 -2 41.99 7.19
 -2 -3 2 213.87 8.41
 2 -3 -2 257.94 16.84
 -2 -3 2 219.84 15.62
 -2 3 2 229.41 10.27
 1 -3 -2 286.12 17.38
 0 -3 -2 30.33 5.97
 -1 3 -2 17.89 2.77
 -1 -3 -2 24.45 5.33
 1 -3 2 17.16 3.3
 2 -3 2 618.68 23.18
 -2 3 -2 609.4 20.57
 -3 3 -2 558.1 23.37
 3 -3 2 601.24 26.89
 3 -3 2 581.37 22.57
 4 -3 2 81.47 11.21
 4 -3 2 77.97 8.32
 5 -3 2 210.67 19.66
 5 -3 2 203.99 13.2
 6 -3 2 5.34 4.02
 6 -3 2 1.44 1.49
 7 -3 2 29.96 5.07
 7 -3 2 26.88 8.87
 7 -3 2 42.16 10.02
 -7 3 -2 27.43 7.13
 -8 3 -2 431.03 29.24
 8 -3 2 460.98 36.04
 8 -3 2 438.93 18.35
 8 -3 2 410.74 31.6
 -9 3 -2 104.87 15.1
 -9 -3 -2 110.11 12.76
 9 -3 2 92.88 17.51
 9 -3 2 119.3 17.78
 -10 3 -2 67.84 14.35
 -10 -3 -2 60.88 10.06
 10 -3 2 81.66 16.12
 10 -3 2 86.32 18.57
 11 -3 2 3.43 7.6
 11 -3 2 0.58 4.83
 -11 3 -2 15.31 8.78
 -11 -3 -2 3.51 3.64
 -12 -3 -2 15.78 6.32
 12 -3 2 27.15 10.83
 12 -3 2 30.75 10.12
 -12 3 -2 24.32 8.76
 -13 3 -2 9.04 6.97
 -13 -3 -2 15.48 8.26
 13 -3 2 8.36 8.85
 13 -3 2 -1.52 4.91
 -14 -3 -2 -1.29 3.43
 14 -3 2 -5.74 8.88
 14 -3 2 -3.45 8.39
 -15 3 -2 -0.8 6.25
 15 3 2 1.61 5.95
 15 -3 2 -2.11 5.35
 15 -3 2 0.31 5.7
 -16 3 -2 17.66 7.96
 16 3 2 44.19 15.49
 16 -3 2 33 15.45
 16 -3 2 24.96 10.97
 -17 3 -2 51.48 14.03
 17 3 2 39.74 15.19
 17 -3 2 48.69 15.09
 17 -3 2 54.76 20.03
 -18 3 -2 39.54 13.73
 18 3 2 15.45 10.06
 -18 4 2 3.61 7.96
 -17 4 2 -1.18 6.69
 17 -4 -2 -5.8 5.87
 -16 4 2 1.65 6.28
 16 -4 -2 8.48 9.28
 -15 4 2 15.47 9.13
 15 -4 -2 7.21 7.76
 -14 4 2 15.78 9.43
 14 -4 -2 8.58 8.87
 -13 4 2 18.44 9.35
 13 -4 -2 8.79 7.22
 -12 4 2 22.1 9.4
 12 -4 -2 1.59 4.87
 -11 4 2 97.79 16.6
 11 -4 -2 107.05 19.83
 10 -4 -2 122.4 19.95
 -10 4 2 126.46 17.64
 9 -4 -2 2.3 4.65
 -9 4 2 1.69 1.08
 -8 4 2 2.46 1.95
 -8 -4 2 14.58 8.33
 -8 4 2 -0.5 4.67
 8 -4 -2 2.92 5.26
 -7 4 2 28.36 8.25
 -7 -4 2 25.97 8.01
 -7 4 2 22.8 4.37
 7 -4 -2 22.95 7.98
 -6 -4 2 323.79 23.69
 6 -4 -2 304.8 23.94
 -6 4 2 343.51 24.38
 -5 -4 2 142.18 15.37
 5 -4 -2 108.2 13.58
 -5 4 2 116.56 13.71
 -4 -4 2 155.23 15.34
 -4 -4 2 143.93 12.11
 4 -4 -2 136.3 14.21
 -4 4 2 141.87 13.93
 -3 -4 2 853.5 24.76
 -3 -4 2 863.7 34.2
 3 -4 -2 867.08 34.35
 -3 4 2 851.37 32.46
 -2 -4 2 10.47 3.42
 2 -4 -2 23.93 6.06
 -2 -4 2 15.86 2.7
 -2 -4 2 14.92 2.78
 -1 -4 2 25.68 2.76
 1 -4 -2 32.87 7.07
 0 -4 -2 558.16 26.05
 0 -4 2 539.55 14.17
 0 4 -2 557.32 14.26
 1 -4 2 129.98 8.69
 -1 4 -2 130.86 8.21
 -1 -4 -2 126.75 12.5
 -2 4 -2 27.38 4.52
 -2 -4 -2 28.5 6.4
 2 -4 2 20.72 4.38
 -3 -4 -2 15.6 2.03
 3 -4 2 20.04 4.98
 4 -4 2 57.58 9.54
 5 -4 2 232.35 21.06
 6 -4 2 77.55 13.55
 -7 4 -2 -4.49 5.82
 7 -4 2 3.62 4.57
 -8 4 -2 0.57 3.49
 8 -4 2 2.5 4.85
 -9 -4 -2 -0.03 3.06
 9 -4 2 1.35 4.05
 -9 4 -2 6.72 7.09
 10 -4 2 236.87 30.57
 -10 -4 -2 100.22 12.54
 -10 4 -2 177.33 22.75
 11 -4 2 100.51 23.19
 -11 4 -2 94.99 17.22
 -11 -4 -2 32.58 7.83
 -12 -4 -2 20.18 7.43
 -12 4 -2 28.3 10.28
 12 -4 2 10.28 7.08
 13 -4 2 11.77 7.6
 -13 4 -2 23.73 9.95
 -13 -4 -2 26.04 8.12
 -14 4 -2 35.11 11.62
 14 -4 2 13.55 10.15
 -15 4 -2 3.92 4.95
 15 -4 2 3.13 4.69
 -16 4 -2 0.61 6.61
 16 -4 2 17.01 11.24
 -17 4 -2 -5.2 6.69
 17 4 2 5.85 5.61
 17 -4 2 -1.5 6.14
 18 4 2 3.34 5.21
 -17 5 2 -2.12 7.36
 17 -5 -2 4.02 9.44
 -16 5 2 1.85 5.45
 16 -5 -2 -3.96 9.48
 -15 5 2 11.32 8.69
 15 -5 -2 -0.86 5.26
 -14 5 2 2.79 5.6
 14 -5 -2 2.84 4.94
 -13 5 2 18.91 8.74
 13 -5 -2 10.85 8.66
 -12 -5 2 45.04 12.53
 -12 5 2 37.4 12.34
 12 -5 -2 38.22 12.97
 -11 -5 2 29.85 11.2
 -11 5 2 12.69 7.84
 11 -5 -2 14.47 8.32
 -10 -5 2 43.05 12.5
 -10 5 2 50.46 13.17
 10 -5 -2 17.84 7.73
 -9 5 2 0.89 1.53
 -9 5 2 4.1 6.39
 9 -5 -2 -0.17 3.84
 -8 5 2 32.22 10.07
 -8 -5 2 33.88 10.37
 -8 5 2 29.82 4.84
 8 -5 -2 20.65 7.89
 -7 -5 2 75.68 13.34
 -7 5 2 97.82 14.58
 7 -5 -2 71.94 13.51
 6 -5 -2 200.91 20.37
 -6 -5 2 201.42 19.46
 -6 5 2 222.24 20.26
 5 5 -2 48.04 6.21
 5 -5 -2 42.58 9.15
 -5 5 2 47.03 9.45
 -5 -5 2 36.73 8.15
 4 -5 -2 1 3.31
 -4 -5 2 2.59 2.19
 -4 5 2 -2.52 4.73
 -4 -5 2 4.64 4.05
 -3 -5 2 16.66 5.09
 3 -5 -2 21.79 6.32
 -3 5 2 9.18 3.55
 -3 -5 2 15.3 3.29
 -2 5 2 -1.7 4.75
 2 -5 -2 1.04 3.05
 -2 -5 2 0.78 0.95
 -1 -5 2 67.72 5.86
 1 -5 -2 72.92 10.48
 0 -5 -2 4.63 3.77
 0 5 -2 5.56 1.98
 0 -5 2 7.03 2.29
 -1 5 -2 17.17 3.71
 1 -5 2 11.54 2.86
 -1 -5 -2 14.96 5.16
 -2 5 -2 10.05 3.07
 -2 -5 -2 6.78 3.84
 2 -5 2 11.92 3.4
 3 -5 2 66.54 8.9
 -3 -5 -2 67.98 10.2
 -4 -5 -2 188.79 9.09
 4 -5 2 173.2 16.27
 5 -5 2 229.23 20.69
 6 -5 2 317.68 26.92
 -6 5 -2 331.75 25.24
 -7 5 -2 48.33 10.06
 7 -5 2 64.66 13.51
 8 -5 2 6.81 4.83
 -8 5 -2 8.52 4.83
 -9 5 -2 44.69 10.81
 9 -5 2 47.9 13.08
 -9 -5 -2 38.65 6.98
 -10 5 -2 128.01 18.43
 10 -5 2 163.7 24.72
 -10 -5 -2 122.19 13.23
 -11 -5 -2 10.45 6.56
 11 -5 2 0.46 4.13
 -11 5 -2 21.13 9.53
 -12 5 -2 6.24 5.98
 12 -5 2 6.77 7.62
 -13 5 -2 11.65 8.07
 13 -5 2 2.06 6.84
 -14 5 -2 7.2 5.83
 14 -5 2 6.26 5.92
 -15 5 -2 -6.81 7.84
 15 -5 2 6.27 7.21
 -16 5 -2 2 5.66
 16 -5 2 13.13 10.31
 -17 5 -2 -16.36 10.66
 -16 6 2 28.65 12.92
 -16 -6 2 37.38 14.65
 16 -6 -2 21.82 12.52
 -15 -6 2 -0.5 6.19
 15 -6 -2 1.32 6.65
 -15 6 2 18.93 10.47
 -14 -6 2 24.13 11.04
 14 -6 -2 11.47 7.65
 -14 6 2 9.56 8.56
 -13 -6 2 44.05 13.84
 -13 6 2 59.42 14.26
 13 -6 -2 30.09 12.76
 -12 6 2 125.58 20.21
 -12 -6 2 124.96 20.31
 12 -6 -2 81.14 18.56
 -11 -6 2 2.41 4.88
 11 -6 -2 -4.82 7.22
 -11 6 2 4.54 6.72
 -10 6 2 23.25 10.99
 -10 -6 2 4.19 6.58
 10 -6 -2 6.74 5.25
 -9 -6 2 17.97 8.83
 -9 6 2 9.51 3.21
 -9 6 2 31.28 11.41
 9 -6 -2 -1.38 5.74
 -8 -6 2 205.59 21.88
 8 -6 -2 196.72 24.03
 -8 6 2 240.61 23.83
 -7 6 2 5.78 6.84
 -7 -6 2 14.58 7.81
 7 -6 -2 6.96 4.81
 6 -6 -2 -0.77 3.11
 -6 6 2 -1.05 4.14
 6 6 -2 1.5 2.11
 -6 -6 2 5.23 4.39
 5 6 -2 -2.94 2.63
 -5 6 2 0.47 0.48
 -5 -6 2 6.32 5.31
 -5 6 2 6.59 6.17
 5 -6 -2 -0.44 2.94
 4 -6 -2 0.22 2.39
 -4 6 2 0.44 4.14
 -4 -6 2 -2.53 4.24
 -3 6 2 46.24 8.31
 3 -6 -2 64.05 11.04
 -3 -6 2 38.84 7.91
 -3 -6 2 52 6.54
 -2 6 2 6.2 4.42
 2 -6 -2 12.76 5.64
 -2 -6 2 7.01 2.52
 -1 -6 2 628.15 21.22
 1 -6 -2 656.51 33.27
 0 -6 2 406.95 17.42
 0 -6 -2 424.84 26.4
 0 6 -2 387.4 17.02
 1 -6 2 3.9 1.91
 1 6 2 5.5 1.5
 -1 -6 -2 5.95 4.52
 -1 6 -2 2.37 2.01
 -2 -6 -2 41.27 8.76
 2 -6 2 40.34 6.44
 3 -6 2 151.28 13.88
 -3 -6 -2 147.83 16.29
 -4 -6 -2 425.74 14.25
 -4 -6 -2 430.6 28.68
 4 -6 2 442.08 26.42
 -5 -6 -2 178.45 10.84
 5 -6 2 197.54 19.25
 -5 6 -2 180.46 18.6
 -6 -6 -2 88.06 8.92
 -6 6 -2 79.89 12.92
 6 -6 2 62.69 12.22
 -7 6 -2 -5.83 5.63
 7 -6 2 -0.02 2.71
 -8 6 -2 5.69 3.88
 8 -6 2 5.66 4.75
 -9 6 -2 60.78 13.5
 -9 -6 -2 45.63 7.16
 9 -6 2 58.35 14.03
 -10 6 -2 57.94 13.37
 10 -6 2 70.6 17.09
 -10 -6 -2 49.4 8.09
 -11 6 -2 89.07 18.7
 11 -6 2 66.96 17.73
 -12 6 -2 51.57 13.96
 12 -6 2 23.15 10.92
 13 -6 2 22.8 11.54
 -13 6 -2 47.26 13.84
 14 -6 2 -2.83 7.73
 -14 6 -2 0.7 5.63
 -15 6 -2 3 5.52
 15 -6 2 18.4 11.35
 16 -6 2 18.17 11.43
 -16 6 -2 -0.37 6.42
 -16 7 2 42.07 13.99
 -16 -7 2 60.32 15.98
 16 -7 -2 40.36 17.11
 -15 7 2 28.77 12.26
 -15 -7 2 17.56 10.27
 15 -7 -2 -12.21 10.25
 -14 7 2 74.45 17.22
 -14 -7 2 82.8 18.23
 14 -7 -2 50.17 16.97
 -13 7 2 15.69 9.91
 -13 -7 2 -3.49 4.3
 13 -7 -2 2.68 6.41
 -12 -7 2 25.38 10.85
 12 -7 -2 11.81 8.99
 -12 7 2 27.08 11.45
 -11 7 2 297.44 30.42
 -11 -7 2 256.23 27.73
 11 -7 -2 263.58 32.27
 -10 7 2 398.08 33.65
 -10 -7 2 478.31 36.5
 10 -7 -2 424.96 38.58
 -9 7 2 34.81 11.81
 -9 -7 2 40.17 11.66
 9 -7 -2 30.64 9.52
 -8 -7 2 169.85 20.42
 -8 7 2 164.17 20.54
 8 -7 -2 164.07 22.27
 -7 7 2 26.46 10.21
 -7 -7 2 13.95 7.33
 7 -7 -2 6.93 5.2
 -6 -7 2 142.11 17.4
 6 -7 -2 140.21 18.28
 -6 7 2 146 17.64
 -6 7 2 102.05 6.43
 6 7 -2 128.33 9.19
 -5 7 2 75.25 12.02
 5 -7 -2 54.69 11.25
 -5 -7 2 48.31 10
 4 -7 -2 -1.96 3.25
 -4 7 2 -6.56 5.06
 -4 -7 2 0.17 1.51
 -4 -7 2 -2.02 5.69
 -3 7 2 124.69 13.75
 -3 -7 2 130.47 11.36
 3 -7 -2 136.52 16.52
 -2 7 2 17.78 4.29
 2 -7 -2 27.62 7.91
 -2 -7 2 17.17 4.2
 -1 -7 2 27.49 5.16
 1 -7 -2 25.02 7.1
 0 -7 2 15.55 3.82
 0 -7 -2 14.86 5.89
 0 7 -2 14.24 3.91
 1 -7 2 312.34 17.81
 -1 -7 -2 314.77 24.96
 1 7 2 314.07 12.27
 -2 -7 -2 31.41 8.29
 2 -7 2 32.68 6.18
 -3 -7 -2 15.2 6.28
 3 -7 2 5.43 2.79
 4 -7 2 173.24 17.03
 -4 -7 -2 178.4 19.39
 -4 7 -2 158.99 17.36
 5 -7 2 149.97 17.23
 -5 -7 -2 130.97 16.88
 -5 -7 -2 153.88 10.54
 -5 7 -2 166.75 18.57
 -6 7 -2 212.66 21.58
 -6 -7 -2 213.9 13.88
 6 -7 2 203.9 21.78
 -7 -7 -2 423.52 21.49
 7 -7 2 433.4 34.03
 -7 7 -2 426.08 31.83
 -8 -7 -2 170.65 15.19
 8 -7 2 157.37 21.81
 -8 7 -2 172.12 21.02
 -9 -7 -2 20.8 6.94
 -9 -7 -2 -0.52 2.39
 9 -7 2 5.63 6.26
 -9 7 -2 21.43 9.09
 -10 7 -2 25.2 10.57
 10 -7 2 30.77 12.72
 -11 7 -2 105.05 18.57
 11 -7 2 83.5 19.11
 -12 7 -2 57.86 14.24
 12 -7 2 33.63 13.41
 -13 7 -2 2.33 5.98
 13 -7 2 5.28 8.46
 -14 7 -2 -7.57 8.18
 14 -7 2 4.61 6.7
 15 -7 2 43.73 15.51
 -15 7 -2 -6.1 7.76
 -16 7 -2 13.71 7.14
 16 -7 2 21.13 12.23
 -16 -8 2 9.16 10.12
 -15 8 2 11.46 7.91
 -15 -8 2 27.83 11.61
 15 -8 -2 18.47 12.5
 -14 8 2 68.25 17.44
 -14 -8 2 53.47 15.68
 14 -8 -2 61.79 19
 -13 8 2 68.82 16.42
 -13 -8 2 73.97 16.53
 13 -8 -2 40.56 13.78
 -12 8 2 294.31 32
 12 -8 -2 303.25 37.11
 -12 -8 2 309.52 32.51
 -11 8 2 63.53 15.49
 -11 -8 2 61.55 14.65
 11 -8 -2 44.18 14.1
 -10 8 2 7.76 8.53
 -10 -8 2 13.22 8.14
 10 -8 -2 -2.27 5.27
 -9 8 2 18.39 10.35
 -9 -8 2 7.56 6.79
 9 -8 -2 0.39 3.56
 8 -8 -2 79.63 15.88
 -8 8 2 97.13 16.35
 -8 -8 2 97.71 16.22
 7 -8 -2 7.99 5.32
 -7 8 2 7.42 7.97
 -7 -8 2 2.3 5.76
 6 -8 -2 99.9 16.21
 -6 8 2 103.03 15.95
 -6 -8 2 100.64 14.72
 -5 8 2 178.45 19.41
 -5 -8 2 159.8 18.32
 5 -8 -2 162.83 19.98
 -5 -8 2 151.09 14.52
 4 -8 -2 82.13 14.05
 -4 8 2 93.99 13.63
 -4 -8 2 67.52 9.28
 -3 8 2 749.39 35.26
 3 -8 -2 687.81 38.66
 -3 -8 2 668.82 28.06
 2 -8 -2 58.63 11.41
 -2 8 2 44.65 8.11
 -2 -8 2 60.19 8.48
 -1 -8 2 224.09 15.97
 1 -8 -2 219.11 21.49
 0 -8 -2 40.42 9.83
 0 -8 2 34.66 6.29
 -1 -8 -2 10.81 6.04
 1 -8 2 2.46 2.14
 1 8 2 2.07 1.13
 2 -8 2 5.69 3.19
 2 8 2 7.67 2.54
 -2 -8 -2 3.49 4.36
 -2 8 -2 -0.32 3.94
 3 -8 2 516.46 28.42
 -3 -8 -2 536.98 34.4
 -3 8 -2 546.44 32.01
 4 -8 2 793.58 37.6
 -4 -8 -2 675 39.82
 -4 8 -2 845.86 41.18
 5 -8 2 360.12 27.54
 -5 8 -2 379.16 28.61
 -5 -8 -2 351.55 29.3
 -6 8 -2 192.18 21.52
 -6 -8 -2 184.5 13.28
 6 -8 2 175.42 20.52
 -6 -8 -2 203.88 23.15
 -7 -8 -2 7.42 3.63
 7 -8 2 6.18 4.75
 -7 8 -2 3.13 4.25
 -8 -8 -2 25.34 6.59
 8 -8 2 16.98 6.5
 -8 8 -2 19.95 8.39
 -9 8 -2 24.3 9.56
 -9 -8 -2 8.96 4.71
 9 -8 2 14.5 7.99
 -10 -8 -2 99.25 13.55
 10 -8 2 64.69 16.81
 -10 8 -2 105.92 18.7
 -11 -8 -2 17.8 8.6
 11 -8 2 8.12 7.79
 -11 8 -2 13.03 9.42
 -12 8 -2 18.45 9.19
 12 -8 2 13.01 8.45
 -13 8 -2 -2.8 6.48
 13 -8 2 0.98 5.49
 -14 8 -2 0.37 5.31
 14 -8 2 18 11.55
 15 -8 2 61.13 19.54
 -15 8 -2 55.87 16.22
 16 -8 2 9.99 7.73
 -15 -9 2 10.93 8.34
 -15 9 2 13.04 10.32
 15 -9 -2 1.11 4.99
 -14 9 2 82.5 18.7
 -14 -9 2 127.41 23.07
 14 -9 -2 93.05 23.49
 -13 9 2 1.83 5.32
 -13 -9 2 7.59 7.19
 13 -9 -2 -3.56 7.63
 -12 9 2 47.46 15.5
 -12 -9 2 16.66 8.6
 12 -9 -2 47.07 14.86
 -11 9 2 61.1 15.06
 -11 -9 2 32.75 11.04
 11 -9 -2 40.7 13.71
 -10 9 2 91.57 18.07
 -10 -9 2 78.88 16.26
 10 -9 -2 49.21 14.6
 9 -9 -2 98.2 18.98
 -9 9 2 115.42 18.4
 -9 -9 2 101.98 17.28
 -8 -9 2 405.51 33.33
 8 -9 -2 441.98 37.84
 -8 9 2 443.71 34.82
 -7 -9 2 33.41 9.15
 7 -9 -2 33.97 10.78
 -7 9 2 47.6 12.26
 -7 -9 2 49.84 10.07
 -6 -9 2 8.66 4.05
 -6 9 2 23.56 8.91
 -6 -9 2 12.04 5.15
 6 -9 -2 12.53 6.55
 -5 9 2 6.87 6.22
 5 -9 -2 11.91 6.23
 -5 -9 2 18.86 5.79
 -4 9 2 145.47 17.55
 4 -9 -2 129.37 18.67
 -4 -9 2 124.31 13.52
 3 -9 -2 261.37 25.04
 -3 -9 2 227.25 17.65
 -3 9 2 248.62 20.68
 -2 9 2 203.32 18.24
 -2 -9 2 208.49 16.65
 2 -9 -2 212.58 22.6
 -1 -9 2 400.52 23.12
 1 -9 -2 462.59 33.01
 0 -9 2 305.12 20.15
 0 -9 -2 432.8 31.42
 0 9 -2 334.23 22.26
 1 9 2 557.34 20.92
 1 -9 2 523.8 27.14
 -1 -9 -2 551.77 35.69
 -1 9 -2 603.54 31.35
 -2 9 -2 136.21 15.55
 2 9 2 138.43 9.79
 2 -9 2 143.32 15.1
 -2 -9 -2 142.33 18.46
 -3 -9 -2 44.75 10.19
 -3 9 -2 47.08 9.94
 3 -9 2 38.79 8.46
 -4 9 -2 21.92 6.71
 -4 -9 -2 18.91 7.21
 4 -9 2 25.42 7.3
 5 -9 2 371.54 28.78
 -5 9 -2 382.68 29.75
 -5 -9 -2 394.91 32.01
 -6 9 -2 229.8 23.95
 6 -9 2 219.27 23.54
 -6 -9 -2 200.2 23.89
 -7 -9 -2 242.31 17.15
 7 -9 2 225.38 25.33
 -7 -9 -2 255.7 27.54
 -7 9 -2 239.26 25.31
 -8 -9 -2 284.18 19.99
 8 -9 2 250.79 28.43
 -8 9 -2 265.7 27.95
 -9 9 -2 104.09 18.62
 9 -9 2 68.2 16.24
 -10 9 -2 90.31 17.54
 10 -9 2 72.66 17.75
 -11 9 -2 37.26 13.44
 11 -9 2 7.39 6.75
 -12 9 -2 28.86 8.23
 12 -9 2 53.12 16.61
 -13 9 -2 18.14 5.97
 13 -9 2 20.88 11.69
 -14 9 -2 26.35 11.12
 14 -9 2 9.16 8.25
 -15 9 -2 21.13 11.93
 15 -9 2 7.89 9.4
 -15 -10 2 58.8 16.69
 -14 10 2 58.73 16.62
 -14 -10 2 44.53 14.68
 14 -10 -2 39.84 15.79
 -13 10 2 20.77 11.44
 -13 -10 2 6.79 7.03
 13 -10 -2 5.46 4.61
 -12 -10 2 244.94 29.92
 -12 10 2 197.26 27.42
 12 -10 -2 270.72 36.4
 -11 10 2 44.77 13.28
 -11 -10 2 77.78 16.59
 11 -10 -2 62.07 16.69
 -10 -10 2 290.64 30.61
 10 -10 -2 279.23 34
 -10 10 2 281.57 30.59
 -9 10 2 145.43 21.99
 -9 -10 2 138.99 20.62
 9 -10 -2 141.24 23.23
 -8 -10 2 13.35 6.39
 -8 10 2 22.52 9.23
 -8 -10 2 23.62 7.38
 8 -10 -2 14.98 7.29
 7 -10 -2 -1.59 4.71
 -7 -10 2 -0.88 2.7
 -7 -10 2 -2.12 5.88
 -7 10 2 5.42 6.66
 6 -10 -2 322.2 31.34
 -6 -10 2 385.14 26.76
 -6 10 2 421.01 31.84
 -5 10 2 323.76 27.2
 5 -10 -2 356.59 32.21
 -5 -10 2 363.1 25.19
 -4 10 2 300.22 25.29
 4 -10 -2 337.02 30.52
 -4 -10 2 322.9 22.96
 4 10 -2 288.52 15.66
 -3 10 2 556.96 32.77
 3 10 -2 508.33 22.95
 3 -10 -2 541.28 37.75
 -3 -10 2 518.61 28.71
 -2 10 2 15.42 5.12
 2 -10 -2 11.11 5.84
 -2 -10 2 17.49 5.19
 2 10 -2 11.42 2.93
 -1 -10 2 268.32 20.3
 1 -10 -2 264.74 26.1
 1 10 -2 294.05 20.22
 0 -10 2 9.23 3.86
 0 -10 -2 18.48 6.52
 0 10 -2 32.34 8.15
 1 -10 2 293.83 21.84
 -1 -10 -2 335.45 29.31
 -1 10 -2 298.93 23.15
 2 -10 2 20.64 6.19
 -2 -10 -2 29.52 9.06
 -2 10 -2 21.02 6.76
 3 -10 2 312.18 24.43
 -3 -10 -2 303.06 28.27
 -3 10 -2 360.73 27.73
 -4 -10 -2 63.05 13.18
 -4 10 -2 76.52 13.58
 4 -10 2 51.66 10.57
 -5 -10 -2 38.13 11.49
 5 -10 2 36.68 9.9
 -5 10 -2 42 10.57
 6 -10 2 267.61 26.97
 -6 10 -2 298 28.11
 -6 -10 -2 257.55 28.07
 -7 10 -2 42.55 12.06
 -7 -10 -2 39.91 12.33
 7 -10 2 33.19 10.15
 -8 -10 -2 153.3 23.09
 8 -10 2 99.82 18.51
 -8 10 -2 166.14 22.82
 -9 10 -2 16.5 9.39
 9 -10 2 4.68 5.19
 -10 10 -2 61.76 15.6
 10 -10 2 42.55 14.05
 -11 10 -2 7.54 4.91
 11 -10 2 5.28 6.84
 12 -10 2 264.14 37.4
 -12 10 -2 307.27 34.02
 -13 10 -2 115.55 22.64
 13 -10 2 87.08 22.08
 -14 10 -2 31.43 12.35
 14 -10 2 25.4 13.27
 15 -10 2 39.89 16.3
 -14 -11 2 1.05 5.6
 -13 11 2 17.93 10.69
 13 -11 -2 23.23 12.47
 -13 -11 2 12.07 8.3
 -12 11 2 7.77 10.3
 12 -11 -2 5.05 7.1
 -12 -11 2 9.5 7.74
 -11 -11 2 3.7 4.63
 -11 11 2 36.68 15.2
 11 -11 -2 16.99 11.16
 -10 -11 2 163.33 23.25
 -10 11 2 214.23 27.32
 -10 -11 2 205.39 24.07
 10 -11 -2 214.76 30.67
 -9 11 2 152.56 22.58
 -9 -11 2 140.08 19.1
 -9 -11 2 113.75 19.36
 9 -11 -2 115.99 21.97
 -8 -11 2 133.66 19.73
 -8 11 2 128.67 20.22
 -8 -11 2 121.85 17.28
 8 -11 -2 134.75 22.56
 7 -11 -2 80.57 17.41
 -7 11 2 76.36 15.83
 -7 -11 2 57.24 11.55
 -6 11 2 31.19 10
 -6 -11 2 29 8.19
 6 -11 -2 26.62 10.19
 -5 -11 2 67.02 11.46
 -5 11 2 60.65 12.96
 5 -11 -2 70.56 15.35
 -4 11 2 114.32 16.7
 -4 -11 2 120.94 14.98
 4 -11 -2 127.74 19.48
 3 -11 -2 95.34 16.43
 -3 11 2 104.09 14.76
 -3 -11 2 97.47 13.16
 3 11 -2 102.64 10.56
 -2 11 2 225.74 20.49
 2 -11 -2 195.05 23.82
 -2 -11 2 211.78 19.36
 2 11 -2 206.63 16.21
 1 11 -2 493.97 26.96
 -1 -11 2 499.09 31.07
 1 -11 -2 467.1 36.63
 0 11 -2 281.33 21.67
 0 -11 2 313 23.53
 0 -11 -2 335.52 32.76
 -1 -11 -2 618.5 41.92
 1 -11 2 624.81 33.81
 -1 11 -2 680.73 35.33
 2 -11 2 139.06 16.48
 -2 11 -2 120.29 15.98
 -2 -11 -2 141.22 20.07
 3 -11 2 11.48 5.14
 -3 -11 -2 20.01 7.41
 -3 11 -2 25.44 8.9
 -4 -11 -2 -2.27 5.62
 -4 11 -2 0.6 4.68
 4 -11 2 -0.74 2.27
 -5 -11 -2 89.79 16.78
 -5 11 -2 102.55 17.07
 5 -11 2 75.34 13.86
 -6 11 -2 43.65 12.15
 -6 -11 -2 39.46 11.47
 6 -11 2 44.17 11.52
 -7 11 -2 135.9 20.88
 -7 -11 -2 106.12 19.49
 7 -11 2 109.49 18.49
 -8 11 -2 129.98 20.7
 -8 -11 -2 131.72 22.38
 8 -11 2 143.18 22.42
 -9 11 -2 72.15 16.66
 -9 -11 -2 35.67 12.86
 9 -11 2 54.81 14.72
 -10 -11 -2 179.94 27.77
 10 -11 2 161.35 26.83
 -10 11 -2 156.72 23.05
 -11 11 -2 110.25 20.16
 11 -11 2 111.37 23.79
 -12 11 -2 7.4 7.53
 12 -11 2 10.15 11.38
 -13 11 -2 17.64 10.75
 13 -11 2 8.07 6.57
 14 -11 2 48.24 17.62
 -14 -12 2 25.11 11.58
 -13 12 2 16.62 11.63
 13 -12 -2 -0.45 5.77
 -13 -12 2 18.64 10.96
 -12 -12 2 27.17 11.15
 -12 12 2 28.41 12.9
 12 -12 -2 39.24 15.64
 -11 12 2 4.08 7.29
 11 -12 -2 8.96 7.99
 -11 -12 2 9.11 6.92
 -10 -12 2 90.27 18.03
 -10 12 2 58.48 15.96
 10 -12 -2 81.62 20.04
 -9 12 2 69.42 17.05
 -9 -12 2 77.02 14.9
 9 -12 -2 37.61 13.13
 -8 12 2 7.22 7.1
 -8 -12 2 5.99 4.37
 8 -12 -2 13.72 8.63
 7 -12 -2 30.87 10.74
 -7 12 2 21.69 8.38
 -7 -12 2 15.54 6.72
 -6 12 2 298.24 28.75
 6 -12 -2 257.6 29.78
 -6 -12 2 300.85 26.04
 -5 12 2 396.47 31.87
 5 -12 -2 358.52 35.04
 -5 -12 2 351.33 27.19
 -4 12 2 604.11 37.84
 4 -12 -2 628.13 45.2
 -4 -12 2 582.82 34.69
 3 -12 -2 569.2 42.23
 -3 -12 2 509.37 31.95
 -3 12 2 545.57 34.29
 2 -12 -2 25.52 9.93
 2 12 -2 25.5 6.5
 -2 -12 2 11.98 4.42
 -2 12 2 7.37 4.62
 1 12 -2 8.54 4.79
 -1 -12 2 6.71 4.5
 1 -12 -2 10.62 6.29
 0 12 -2 8.96 5.32
 0 -12 2 -0.88 2.29
 0 -12 -2 -2.85 4.78
 -1 12 -2 30.03 8.24
 1 -12 2 33.69 8.44
 -1 -12 -2 30.96 10.38
 2 -12 2 14.3 5.84
 -2 -12 -2 24.23 8.5
 -2 12 -2 18.06 7.33
 3 -12 2 27.04 8.43
 -3 -12 -2 26.92 9.37
 -3 12 -2 29.64 9.86
 -4 12 -2 17.08 8.74
 -4 -12 -2 17.79 8.59
 4 -12 2 3.21 3.49
 -5 12 -2 118.8 18.59
 -5 -12 -2 98.38 18.27
 5 -12 2 80.66 15.16
 6 -12 2 298.81 30.18
 -6 -12 -2 331.75 34.05
 -6 12 -2 350.59 32.2
 -7 12 -2 73.94 16.27
 -7 -12 -2 59.9 14.97
 7 -12 2 41.28 11.98
 -8 12 -2 119.49 19.62
 -8 -12 -2 107.13 20.58
 8 -12 2 104.99 19.92
 -9 -12 -2 28.24 11.46
 9 -12 2 28.3 11.36
 -9 12 -2 10.6 6.64
 -10 12 -2 28.14 10.85
 -10 -12 -2 26.54 11.92
 10 -12 2 31.97 11.95
 -11 12 -2 80.4 17.99
 -11 -12 -2 115.2 23.46
 11 -12 2 102.65 23.52
 -12 12 -2 103.94 21.49
 -12 -12 -2 138.06 27.23
 12 -12 2 129.04 26.72
 -13 12 -2 80.35 19.53
 -13 -12 -2 117.89 26.08
 13 -12 2 55.93 18.89
 14 -12 2 63.98 20.79
 -13 -13 2 13.68 8.99
 -12 -13 2 -4.43 7.7
 -12 13 2 -1.87 6.39
 12 -13 -2 2.1 5.35
 -11 13 2 5.68 7.23
 11 -13 -2 1.05 5.71
 -10 13 2 20.57 11.14
 10 -13 -2 27.91 11.72
 -9 13 2 11.95 10.15
 9 -13 -2 1.64 4.79
 -8 13 2 76.05 16.8
 8 -13 -2 75.87 17.97
 -7 13 2 179.33 24.31
 -7 -13 2 184.49 21.88
 7 -13 -2 198.76 28.13
 -6 13 2 90.62 18.12
 -6 -13 2 80.17 13.86
 6 -13 -2 79.76 17.56
 5 -13 -2 38.77 11.79
 -5 13 2 43.7 11.44
 -5 -13 2 48.14 10.93
 4 -13 -2 27.29 10.19
 -4 13 2 25.15 7.39
 -4 -13 2 22.31 7.43
 3 -13 -2 21.15 9.39
 -3 -13 2 19.37 6.94
 -3 13 2 11.49 5.89
 -2 13 2 195.71 20.4
 2 -13 -2 194.58 26.38
 -2 -13 2 216.85 21.95
 -1 -13 2 388.56 29.06
 1 -13 -2 434.5 38.09
 0 -13 2 29.55 8.21
 0 13 -2 41.05 9.03
 0 -13 -2 24.28 9.24
 1 -13 2 24.65 7.83
 -1 13 -2 31.32 9.44
 -1 -13 -2 14.73 7.95
 -2 13 -2 10.01 6.84
 -2 -13 -2 3.7 4.75
 2 -13 2 -1.48 2.57
 3 -13 2 12.26 6.03
 -3 13 -2 13.44 7.62
 -3 -13 -2 11.5 6.54
 -4 -13 -2 1 3.72
 -4 13 -2 8.8 7.67
 4 -13 2 4.28 4.35
 -5 -13 -2 4.4 5.84
 -5 13 -2 17.31 8.48
 5 -13 2 5.55 4.19
 -6 -13 -2 2.64 4.15
 -6 13 -2 3.36 5.56
 6 -13 2 1.11 3.04
 -7 -13 -2 39.92 12.99
 -7 13 -2 4.78 7.31
 7 -13 2 20.92 8.69
 -8 13 -2 134.13 21.38
 8 -13 2 172.16 26.12
 -8 -13 -2 176.77 27.53
 -9 13 -2 46.22 13.3
 -9 -13 -2 82.92 19.9
 9 -13 2 36.91 13.66
 -10 13 -2 68.7 16.95
 -10 -13 -2 74.57 18.8
 10 -13 2 52.9 15.88
 -11 13 -2 20.15 10.63
 -11 -13 -2 30.28 13.95
 11 -13 2 24.62 10.91
 -12 13 -2 -2.83 5.96
 -12 -13 -2 6.83 6.72
 12 -13 2 -5.91 8.75
 13 -13 2 3.15 5.61
 -11 14 2 2.77 5.84
 11 -14 -2 5.3 7.05
 -10 14 2 12.31 10.35
 10 -14 -2 13.76 9.59
 -9 14 2 19 9.57
 9 -14 -2 10.98 9.44
 -8 14 2 48.79 14.57
 8 -14 -2 52.83 16.06
 7 -14 -2 29.42 11.95
 -7 14 2 30.49 11.61
 6 -14 -2 35.53 12.83
 -6 14 2 13.2 7.87
 5 -14 -2 109.45 20.94
 -5 14 2 116.21 18.8
 -4 14 2 165.96 20.92
 4 -14 -2 186.12 26.69
 -4 -14 2 182.54 21.44
 -3 14 2 177.14 20.79
 3 -14 -2 146.07 23.05
 -3 -14 2 163.43 19.96
 2 -14 -2 54.54 14.75
 -2 -14 2 56.16 11.73
 -2 14 2 34.74 8.83
 1 -14 -2 -1.83 3.41
 -1 -14 2 26.3 8.01
 0 -14 2 140.06 18.62
 0 -14 -2 200.81 29.43
 -1 14 -2 119.53 16.03
 1 -14 2 121.05 17.52
 -1 -14 -2 110.4 20.06
 -2 14 -2 32.46 8.19
 -2 -14 -2 36.57 11.58
 2 -14 2 38.48 10.26
 3 -14 2 7.37 5.13
 -3 14 -2 -5.68 7.8
 -3 -14 -2 10.3 7.04
 -4 14 -2 0.28 5.48
 -4 -14 -2 1.58 6.5
 4 -14 2 -3.58 4.23
 -5 14 -2 16.92 7.28
 5 -14 2 8.45 6.3
 -5 -14 -2 6.99 6.12
 -6 14 -2 32.16 10.1
 -6 -14 -2 42.75 13.55
 6 -14 2 41.78 12.67
 -7 -14 -2 77.68 18.65
 -7 14 -2 72.69 16.27
 7 -14 2 83.55 18.33
 -8 14 -2 121.04 21.18
 -8 -14 -2 111.72 22.61
 8 -14 2 102.02 20.69
 -9 14 -2 62.84 16.77
 -9 -14 -2 78.29 19.65
 9 -14 2 62.99 17.12
 -10 14 -2 12.03 15.25
 -10 -14 -2 5.18 6.34
 10 -14 2 15.09 8.93
 -11 14 -2 4.56 8.51
 -11 -14 -2 15.82 9.32
 11 -14 2 6.38 6.93
 12 -14 2 41.38 15.91
 -10 15 2 -1.44 6.37
 -9 15 2 9.24 8.59
 9 -15 -2 0.51 5.25
 -8 15 2 -5.35 5.96
 8 -15 -2 3.7 4.71
 7 -15 -2 15.91 9.98
 -7 15 2 -7.45 7.53
 6 -15 -2 40.01 13.66
 -6 15 2 33.32 11.41
 -5 15 2 -2.45 5.79
 5 -15 -2 -5.34 5.52
 -4 15 2 3.75 6.11
 4 -15 -2 9.26 8.36
 -3 15 2 19.28 6.89
 3 -15 -2 48.72 14.64
 2 -15 -2 33.75 12.11
 -1 -15 2 27.73 8.78
 1 -15 -2 31.49 12.03
 0 -15 2 4.85 4.87
 0 -15 -2 5 6.06
 1 -15 2 27.06 8.99
 -1 -15 -2 11.68 6.94
 -2 -15 -2 5.67 6.45
 2 -15 2 -5.1 5.31
 3 -15 2 -12.15 6.49
 -3 -15 -2 2.74 3.91
 -3 15 -2 -7.13 6.47
 -4 15 -2 -3.14 6.41
 -4 -15 -2 2.13 4.08
 4 -15 2 0.81 3.22
 -5 15 -2 5.5 6.92
 5 -15 2 -1.55 3.83
 -5 -15 -2 3.85 6.07
 -6 15 -2 -2.43 5.22
 -6 -15 -2 3.51 6.33
 6 -15 2 -1.84 5.88
 -7 15 -2 6.8 5.26
 -7 -15 -2 6.18 6.24
 7 -15 2 4.17 5.29
 -8 15 -2 14.99 9.46
 -8 -15 -2 21.97 10.92
 8 -15 2 11.71 8.6
 -9 15 -2 17.3 9.45
 -9 -15 -2 18.36 11.06
 9 -15 2 26.36 12.38
 -10 15 -2 34.62 13.88
 -10 -15 -2 19.31 10.25
 10 -15 2 16.85 9.81
 11 -15 2 -1.37 7.45
 -9 16 2 21.84 9.28
 -8 16 2 -2.78 6.13
 8 -16 -2 14.57 10.3
 7 -16 -2 -1.01 3.57
 -7 16 2 -1.66 5.52
 6 -16 -2 6.11 6.18
 -6 16 2 -3.53 6.37
 -5 16 2 -2.43 6.11
 5 -16 -2 -3.78 7.81
 -4 16 2 8.87 4.68
 4 -16 -2 2.22 5.02
 3 -16 -2 -8.49 6.93
 2 -16 -2 55.97 15.38
 1 -16 -2 17.7 10.46
 0 -16 -2 3.76 4.79
 -1 -16 -2 37.07 12.49
 -2 -16 -2 13.25 7.99
 2 -16 2 20.97 8.88
 3 -16 2 0.59 4.25
 -3 -16 -2 7.64 7.14
 -4 16 -2 3.46 5.09
 -4 -16 -2 4.89 6.28
 4 -16 2 12.34 6.98
 -5 16 -2 4.15 6.52
 -5 -16 -2 0.21 4.21
 5 -16 2 6.34 6.21
 -6 16 -2 0.19 4.61
 -6 -16 -2 12.56 8.78
 6 -16 2 -3.77 6.1
 -7 16 -2 0.08 6.19
 -7 -16 -2 6.45 6.82
 7 -16 2 0.83 4.58
 -8 16 -2 17.62 9.75
 -8 -16 -2 22.05 11.43
 8 -16 2 10.55 8.01
 -9 16 -2 8.29 8.28
 9 -16 2 1.22 4.5
 10 -16 2 5.73 7.29
 -9 17 2 9.3 9.47
 -8 17 2 30.32 12.55
 -7 17 2 21.37 9.91
 6 -17 -2 23.98 11.31
 -6 17 2 32.6 11.81
 5 -17 -2 15.66 9.85
 4 -17 -2 3.61 6.89
 3 -17 -2 22.5 11.15
 2 -17 -2 19.48 9.67
 1 -17 -2 32.42 13.18
 0 -17 -2 11.22 9.41
 -1 -17 -2 10.54 8.43
 -2 -17 -2 17.49 9.64
 -3 -17 -2 12.58 9.34
 -4 -17 -2 -4.17 7.58
 -5 -17 -2 8.76 7.23
 -6 17 -2 7.83 8.19
 -6 -17 -2 4.5 3.67
 -7 17 -2 -6.31 8.26
 -7 -17 -2 2.19 6.79
 -8 17 -2 23.75 11.89
 8 -17 2 14.22 8.7
 -9 17 -2 4.1 6.34
 3 -18 -2 103.44 23.44
 2 -18 -2 18.33 9.52
 1 -18 -2 5.77 6.56
 0 -18 -2 21.51 11.3
 -1 -18 -2 75.87 20.54
 -2 -18 -2 -3.89 6.81
 -3 -18 -2 15.21 8.73
 -4 -18 -2 16 9.65
 18 0 -3 5.65 8.27
 17 0 -3 16.26 11.76
 16 0 -3 -1.13 7.13
 -15 0 3 -12.33 9.25
 15 0 -3 4.13 6.72
 -14 0 3 -21.79 10.43
 14 0 -3 2.36 4.01
 -13 0 3 -16.18 9.18
 13 0 -3 2.2 6.64
 -12 0 3 -5.36 5.8
 12 0 -3 -2.95 5.42
 11 0 -3 -1.74 5.42
 10 0 -3 0.1 3.46
 9 0 -3 -1.59 4.92
 8 0 -3 0.74 3.44
 7 0 -3 2.58 3.75
 6 0 -3 -2.04 2.87
 -6 0 3 -0.64 2.63
 -5 0 3 1.08 1.95
 5 0 -3 -1.17 2.81
 4 0 -3 0.47 1.36
 -4 0 3 -1.73 3.19
 -3 0 3 0.09 0.89
 -3 0 3 5.22 3.6
 -3 0 3 1.35 2.81
 3 0 -3 -1.23 1.98
 2 0 -3 -0.47 1.16
 -2 0 3 1.17 2.65
 -2 0 3 -0.51 0.95
 -2 0 3 0 2.33
 1 0 -3 -0.14 1.15
 -1 0 3 1.74 3.5
 -1 0 3 1.43 1.85
 0 0 -3 -0.42 0.99
 0 0 3 1.43 4.31
 -1 0 -3 -0.58 1.26
 1 0 3 5.68 4.16
 2 0 3 -8.82 4.36
 3 0 3 -1.52 4.04
 4 0 3 -2.37 5.19
 5 0 3 -0.01 3.68
 6 0 3 -0.63 3.06
 7 0 3 5.61 5.09
 8 0 3 5.43 5.92
 9 0 3 4.2 5.78
 10 0 3 -1.61 5.69
 11 0 3 6.69 6.86
 -11 0 -3 -1.51 3.43
 -12 0 -3 -7.09 6.6
 12 0 3 -6.13 4.54
 -13 0 -3 -0.75 3.63
 13 0 3 -4.93 5.73
 -14 0 -3 2.82 5.32
 14 0 3 -6.67 5.19
 -15 0 -3 5.42 5.15
 15 0 3 -3.36 5.9
 -16 0 -3 4.28 6.38
 16 0 3 -3.46 5.33
 -17 0 -3 -21.22 11.14
 17 0 3 1.46 7.62
 18 1 -3 -10.22 9.2
 18 -1 -3 4.98 7.73
 -17 1 3 -5.75 7.36
 17 1 -3 3.38 6.42
 17 -1 -3 -11.82 10.6
 -16 1 3 -6.03 8.93
 16 1 -3 5.66 4.87
 16 -1 -3 9.42 7.48
 -15 1 3 -7.64 6.77
 15 1 -3 4.57 6.22
 15 -1 -3 0.57 5.5
 -14 1 3 12.75 7.38
 14 1 -3 18.97 9.14
 14 -1 -3 9.57 6.68
 -13 1 3 -10.62 8.59
 13 1 -3 21.05 11.23
 13 -1 -3 17.85 10.15
 -12 1 3 55.04 11.83
 12 1 -3 74.74 17.44
 12 -1 -3 83.1 18.48
 -11 1 3 -0.09 6.78
 11 1 -3 18.63 8.76
 11 -1 -3 2.33 4.59
 -10 1 3 3.72 6.66
 10 1 -3 2.96 5.17
 10 -1 -3 7.9 5.43
 9 1 -3 18.51 7.63
 9 -1 -3 12.94 6.2
 8 1 -3 4.95 4.44
 8 -1 -3 4.37 4.41
 7 1 -3 118.86 15.27
 7 -1 -3 120.21 15.38
 -7 1 3 124.35 12.01
 -6 1 3 41.66 6.68
 6 1 -3 48.92 9.02
 6 -1 -3 46.73 8.85
 -5 -1 3 162.51 16.14
 5 1 -3 185.97 15.16
 -5 1 3 162.5 13.52
 5 -1 -3 174.95 15.47
 -4 1 3 69.17 9.27
 4 1 -3 72.81 8.21
 4 -1 -3 59.69 8.23
 -4 -1 3 59.33 6.77
 -4 -1 3 78.62 10.86
 -4 -1 3 64.33 9
 -3 1 3 134.65 12.08
 -3 1 3 135.46 12.34
 3 1 -3 143.85 9.74
 3 -1 -3 147.95 11.77
 -3 -1 3 138.18 12.83
 -3 -1 3 123 8.81
 3 -1 -3 132.72 10.77
 -3 -1 3 127.8 13.12
 -2 1 3 108.64 10.47
 -2 1 3 105.17 11
 2 1 -3 108.06 7.09
 -2 -1 3 105.04 11.08
 2 -1 -3 110.98 9.76
 -2 1 3 118.6 10.49
 -2 -1 3 115.27 7.43
 -2 -1 3 118.53 11.84
 2 -1 -3 120.08 11.01
 -1 1 3 115.57 9.86
 -1 -1 3 109.14 10.89
 -1 -1 3 128.57 12.52
 1 1 -3 109.02 6.78
 1 -1 -3 118.55 10.06
 -1 1 3 107.18 9.72
 0 -1 3 3.18 3.43
 0 -1 -3 8.1 3.62
 0 -1 -3 3.34 1.95
 0 1 -3 6.03 1.79
 0 1 3 9.9 3.98
 -1 1 -3 72.53 8.2
 -1 -1 -3 83.74 7.27
 1 -1 3 74.81 9.54
 -1 -1 -3 87.76 8.96
 1 1 3 89.09 11.32
 -2 1 -3 154.49 13.2
 2 -1 3 145.19 12.94
 2 1 3 149.07 15.88
 3 -1 3 4.95 4.83
 3 -1 3 10.1 4.41
 3 1 3 3.56 3.33
 4 1 3 15.77 6.93
 4 -1 3 8.62 4.04
 4 -1 3 2.52 3.65
 5 1 3 79.24 13.68
 5 -1 3 72 9.34
 5 -1 3 72.95 12.85
 6 -1 3 10.35 5.15
 6 -1 3 3.55 3.64
 6 1 3 6.93 6.53
 7 1 3 18.38 8.17
 7 -1 3 20.04 5.49
 7 -1 3 11.44 6.73
 8 -1 3 38.97 7.26
 8 1 3 32.47 10.51
 8 -1 3 43.13 12.14
 9 1 3 37.78 13.47
 9 -1 3 20.73 5.87
 9 -1 3 25.03 10.45
 10 1 3 8.95 8.36
 10 -1 3 9.38 3.71
 10 -1 3 2.39 4.24
 -11 1 -3 3.47 8.68
 11 -1 3 42.34 9.41
 -11 -1 -3 9.94 6.7
 11 1 3 55.27 16.21
 11 -1 3 78.44 21.43
 -12 1 -3 72.67 14.65
 -12 -1 -3 74.95 13.48
 12 1 3 92.21 19.28
 12 -1 3 63.39 16.21
 -13 1 -3 11.93 7.46
 -13 -1 -3 4.61 4.35
 13 1 3 20.25 11.98
 13 -1 3 22.74 9.76
 14 1 3 3.93 7.67
 -14 1 -3 13.46 7.55
 -14 -1 -3 -2.1 4.22
 14 -1 3 -8.05 8.71
 15 1 3 17.11 11.01
 -15 1 -3 29.08 10.3
 -15 -1 -3 25.9 9.68
 15 -1 3 -0.27 5.88
 -16 1 -3 2.77 7.04
 -16 -1 -3 5.41 5.68
 16 -1 3 -1.91 7.81
 16 1 3 5.7 8.19
 -17 1 -3 -12.99 8.33
 17 -1 3 -10.38 10.29
 17 1 3 4.41 6.8
 18 -1 3 6.92 4.9
 -17 2 3 31.36 11.71
 17 -2 -3 41.65 17.63
 -16 2 3 71.96 15.99
 16 2 -3 65.47 19.68
 -15 2 3 10.91 7.35
 15 2 -3 6.79 7.35
 15 -2 -3 9.46 7
 -14 2 3 16.57 7.61
 14 2 -3 35.55 13.56
 14 -2 -3 23.46 12.73
 -13 2 3 -6.53 6.97
 13 2 -3 0.55 4.32
 13 -2 -3 10.17 8.66
 -12 2 3 13.53 9.08
 12 2 -3 15.6 8.97
 12 -2 -3 22.64 10.81
 11 2 -3 16.25 8.18
 11 -2 -3 20.71 9.22
 -11 2 3 16.7 7.13
 -10 2 3 20.68 6.53
 10 2 -3 31.17 10.05
 10 -2 -3 24.27 9.9
 -9 2 3 -8.98 7.95
 9 2 -3 0.75 2.92
 9 -2 -3 2.47 4.87
 -8 2 3 23.99 5.31
 -8 2 3 9.16 4.95
 8 2 -3 18.88 7.18
 8 -2 -3 34.22 9.36
 -7 -2 3 136.75 17.39
 7 2 -3 132.66 15.72
 7 -2 -3 154.87 17.95
 -7 2 3 132.21 12.16
 -6 2 3 0.43 2.15
 6 2 -3 -0.37 2.12
 6 -2 -3 0.1 0.96
 6 -2 -3 -1.02 2.39
 -5 -2 3 458.63 27.38
 -5 2 3 445.53 22.09
 5 2 -3 485.89 24.31
 5 -2 -3 466.67 26.1
 5 -2 -3 447.52 14.71
 -4 2 3 455.76 22.72
 -4 -2 3 429.89 25.58
 4 2 -3 487.35 20.89
 4 -2 -3 480.93 24.59
 -4 -2 3 430.38 16.65
 4 -2 -3 459.38 16.57
 -3 -2 3 16.95 2.79
 -3 -2 3 12.76 4.86
 3 -2 -3 21.68 5.15
 3 2 -3 14.97 3.04
 -3 -2 3 11.99 4.85
 2 -2 -3 -0.28 1.74
 -2 2 3 6.09 3.69
 -2 -2 3 -0.03 2.85
 -2 -2 3 2.65 2.51
 -1 2 3 320.67 15.31
 1 -2 -3 344.74 19.16
 -1 -2 3 294.86 19.29
 -1 2 3 309.82 18.2
 0 2 -3 61.86 5.12
 0 -2 3 78.92 9.94
 0 -2 -3 145.22 15.44
 0 2 -3 64.81 4.34
 -1 -2 -3 799.66 19.27
 -1 2 -3 798.8 23.73
 1 -2 3 816.86 31.59
 -1 -2 -3 796.95 29.4
 1 2 3 827.08 34.6
 -2 -2 -3 386.71 13.52
 -2 2 -3 388.02 19.94
 2 -2 3 397.87 22.01
 -2 -2 -3 397.59 21.34
 2 2 3 421.42 26.55
 3 2 3 18.82 7.18
 3 -2 3 16.41 4.98
 4 2 3 12.12 7.12
 4 -2 3 7.26 3.78
 5 -2 3 135.57 12.81
 5 -2 3 131.22 17.3
 5 2 3 131.36 18.08
 6 2 3 48.95 12.17
 6 -2 3 35.94 6.75
 6 -2 3 41.39 9.9
 6 -2 3 38.8 10.21
 7 2 3 5.36 6.35
 7 -2 3 2.51 2.58
 7 -2 3 -3.76 3.34
 7 -2 3 0.27 4.52
 8 2 3 11.12 8.11
 8 -2 3 5.48 2.97
 8 -2 3 6.1 5.82
 8 -2 3 6.53 5.5
 9 -2 3 -0.87 2.56
 9 -2 3 3.49 6.21
 9 -2 3 -3.9 5.77
 -10 2 -3 17.1 6.97
 10 2 3 71.34 16.56
 10 -2 3 34.4 11.77
 10 -2 3 39.56 6.76
 10 -2 3 12.85 6.95
 11 -2 3 108.96 21.53
 -11 2 -3 111.08 17.33
 11 2 3 177.9 25.96
 11 -2 3 118.84 20.37
 -11 -2 -3 124.18 16.68
 -12 2 -3 233.65 25.99
 -12 -2 -3 202.98 21.93
 12 -2 3 200.01 27.72
 12 2 3 215.54 29.56
 13 -2 3 226.5 30.81
 13 2 3 313.15 36.36
 -13 -2 -3 264.4 25.7
 -13 2 -3 234.9 26.62
 14 2 3 15.13 10.49
 -14 -2 -3 9.27 5.62
 -14 2 -3 4.1 6.09
 14 -2 3 -6.68 5.44
 15 2 3 28.12 13.69
 -15 2 -3 32.25 10.68
 -15 -2 -3 30.61 9.77
 15 -2 3 9.92 6.23
 16 2 3 13.25 10.14
 -16 2 -3 18.97 9.41
 16 -2 3 13.9 9.42
 17 2 3 18.93 11.56
 -17 2 -3 9.18 6.62
 17 -2 3 30.13 13.5
 -18 2 -3 -9.9 8.06
 18 -2 3 9.19 8.46
 -17 3 3 -14.36 9.31
 17 -3 -3 16.29 9.82
 -16 3 3 -13.98 11.69
 16 -3 -3 -1.39 5.86
 -15 3 3 11.66 8.84
 15 -3 -3 9.77 8.69
 -14 3 3 165.15 23.88
 14 -3 -3 181.83 30.21
 -13 3 3 -3.27 6.73
 13 3 -3 -3.99 5.72
 13 -3 -3 3.08 4.4
 -12 3 3 64.98 13.5
 12 3 -3 74.22 17.01
 12 -3 -3 51.8 15.34
 -11 3 3 -5.59 9.01
 11 3 -3 8.25 6.87
 11 -3 -3 1.99 4.24
 -10 3 3 -11.46 9.17
 10 3 -3 3.29 3.02
 10 -3 -3 -3.95 5.31
 -9 3 3 499.86 33.93
 -9 -3 3 511.07 35.44
 9 3 -3 440.64 33.2
 -9 3 3 489.53 22.69
 9 -3 -3 436.14 34.78
 -8 3 3 9.88 4.88
 -8 -3 3 31.53 9.61
 -8 3 3 16.54 4.65
 8 3 -3 15.35 6.26
 8 -3 -3 15.46 6.94
 -7 3 3 55.63 9.65
 -7 3 3 62.06 8.44
 -7 -3 3 78.55 13.52
 7 3 -3 59.19 10.57
 7 -3 -3 68.65 12.72
 -6 -3 3 30.59 9.85
 6 3 -3 12.83 4.87
 -6 3 3 22.51 5.62
 6 -3 -3 12.34 5.07
 -5 3 3 102.03 11.04
 -5 -3 3 95.38 13.67
 5 3 -3 83.61 9.78
 -5 -3 3 88.28 8.62
 5 -3 -3 89.86 12.03
 -4 -3 3 113.71 13.92
 -4 -3 3 101.21 7.48
 4 -3 -3 92.38 11.61
 -3 -3 3 1848.87 52.92
 3 -3 -3 1816.72 49.5
 -3 -3 3 1725.87 22.22
 -2 -3 3 802 34.17
 2 -3 -3 824.6 32.57
 -2 3 3 819.93 26.09
 -1 3 3 490.89 17.7
 1 -3 -3 412.09 23.78
 -1 3 3 330.39 18.76
 0 3 3 957.7 21.23
 0 -3 -3 966.25 34.87
 0 -3 3 982.07 35.54
 0 3 3 973.46 35.06
 1 3 3 48.13 9.82
 -1 3 -3 26.19 3.52
 -1 -3 -3 43.04 8.02
 1 -3 3 24.32 5.99
 2 3 3 14.11 7.55
 -2 -3 -3 7.25 1.67
 2 -3 3 7.39 3.52
 -2 -3 -3 12.4 4.53
 -2 3 -3 6.66 2.42
 3 -3 3 97.71 11.25
 -3 3 -3 76.16 9.27
 3 -3 3 86.17 10.85
 4 -3 3 573.71 30.26
 4 -3 3 566.49 26.58
 5 -3 3 4.81 3.29
 5 -3 3 15.72 6.43
 6 -3 3 244.68 23.87
 6 -3 3 232.04 16.92
 7 -3 3 31.97 6.55
 7 -3 3 22.45 8.05
 8 -3 3 66.54 9.16
 8 -3 3 52.83 13.36
 9 -3 3 190.7 25.79
 9 -3 3 185.85 14.81
 9 -3 3 172.89 23.4
 10 -3 3 6.18 3.18
 -10 3 -3 -2.84 5.94
 10 -3 3 1.22 3.81
 10 -3 3 4.31 5.62
 11 -3 3 191.96 29.05
 -11 -3 -3 191.67 20.03
 11 -3 3 186.61 26.06
 11 3 3 244.19 30.69
 -11 3 -3 185.05 22.59
 -12 -3 -3 5.65 4.11
 -12 3 -3 2.81 7.68
 12 3 3 17.33 10.04
 12 -3 3 4.73 5.64
 12 -3 3 6.9 5.53
 13 3 3 187.86 28.54
 13 -3 3 165.89 29.28
 13 -3 3 128.46 22.91
 -13 3 -3 152.89 21.93
 -13 -3 -3 183.06 20.74
 -14 3 -3 44.16 12.76
 -14 -3 -3 51.21 11.48
 14 -3 3 43.28 15.63
 14 3 3 67.59 18.51
 14 -3 3 59.35 16.16
 15 3 3 68.71 19.03
 -15 3 -3 57.87 14.44
 15 -3 3 73.58 17.83
 -16 3 -3 20.68 9.44
 16 3 3 -7.75 7.38
 -17 3 -3 -4.92 8.65
 17 3 3 4.67 8.27
 -17 4 3 27.88 11.85
 17 -4 -3 57.59 20.16
 -16 4 3 234.65 30.7
 -16 -4 3 208.46 30.78
 16 -4 -3 184.74 33.53
 -15 -4 3 40.65 15.02
 -15 4 3 18.37 9.43
 15 -4 -3 20.96 12.78
 -14 -4 3 60.12 16.11
 -14 4 3 69.89 15.47
 14 -4 -3 37.45 15.08
 -13 -4 3 47.67 14.88
 -13 4 3 38.42 10.75
 13 -4 -3 34.9 14.3
 -12 4 3 -2.26 6.78
 -12 -4 3 19.2 10.49
 12 -4 -3 10.16 9.7
 -11 4 3 79.44 15.72
 -11 -4 3 72.94 15.7
 11 -4 -3 62.32 15.61
 -10 4 3 221.98 24.49
 -10 -4 3 231.91 25.37
 10 -4 -3 222.78 26.73
 -9 4 3 64.34 12.68
 -9 4 3 72.26 8.76
 -9 -4 3 61.29 14.02
 9 -4 -3 76.86 15.49
 -8 4 3 0.04 5.91
 -8 4 3 8.55 3.82
 -8 -4 3 19.69 8.7
 8 -4 -3 13.51 6.33
 -7 4 3 207.42 20.41
 -7 -4 3 267.55 24.4
 -7 4 3 232.77 16.16
 7 -4 -3 220.26 22.51
 -6 4 3 60.44 10.48
 -6 -4 3 94.66 14.59
 6 -4 -3 83.94 13.06
 -5 -4 3 1215.19 47.63
 -5 -4 3 1113.8 31.26
 5 -4 -3 1164.19 45.67
 -4 -4 3 747.92 36.68
 -4 -4 3 693.48 19.62
 4 -4 -3 750.14 34.96
 -3 -4 3 208.93 18.77
 3 -4 -3 248.41 19.68
 2 -4 -3 13.43 4.56
 -2 4 3 12.92 3.53
 1 -4 -3 522.75 28.56
 -1 4 3 497.05 23.46
 0 4 3 553.88 14.13
 0 -4 -3 818.27 39.65
 1 -4 3 2682.9 38.82
 -1 4 -3 2640.17 33.34
 -1 -4 -3 2747.29 63.4
 2 -4 3 861.66 28.37
 -2 4 -3 870.04 24.72
 -2 -4 -3 870.35 36.37
 3 -4 3 5.78 3.68
 -3 -4 -3 2.15 2.75
 4 -4 3 255.03 20.54
 5 -4 3 4.54 3.97
 6 -4 3 -1.07 3.35
 7 -4 3 65.24 13.62
 8 -4 3 2.81 6.41
 9 -4 3 12.86 11.75
 -9 4 -3 -5.2 6.83
 10 -4 3 249.48 30.92
 -10 4 -3 264 27.15
 -11 4 -3 52.18 11.96
 11 -4 3 60.88 16.3
 -11 -4 -3 68.61 11.62
 -12 4 -3 27.14 10.01
 12 -4 3 25.29 11.66
 -12 -4 -3 14.8 6.49
 -13 4 -3 116.8 19.9
 13 -4 3 81.97 20.96
 -13 -4 -3 102.15 15.54
 14 4 3 7.55 8.8
 14 -4 3 2.59 7.08
 -14 4 -3 9.64 7.42
 -15 4 -3 14.23 8.7
 15 -4 3 -0.1 6.16
 -16 4 -3 36.75 13.22
 16 4 3 27.91 14.46
 16 -4 3 18.65 11.23
 -17 4 -3 53.06 15.07
 -16 5 3 13.04 8.19
 -16 -5 3 18.84 11.46
 16 -5 -3 16.82 11.15
 -15 5 3 0.7 5.21
 -15 -5 3 -1.39 7.37
 15 -5 -3 -2.26 7.66
 -14 5 3 74.7 17.44
 -14 -5 3 101.32 20.11
 14 -5 -3 82.21 21.09
 -13 5 3 15.58 7.96
 -13 -5 3 12.45 8.86
 13 -5 -3 5.36 5.49
 -12 -5 3 205.24 26.52
 -12 5 3 183.52 24.51
 12 -5 -3 179.66 27.69
 -11 -5 3 150.39 22.46
 -11 5 3 84.33 16.37
 11 -5 -3 111.89 20.58
 -10 5 3 46.71 12.36
 -10 -5 3 54.15 13.08
 10 -5 -3 52.38 13.67
 -9 5 3 307.4 27.83
 -9 -5 3 286.6 27.65
 -9 5 3 308.24 18.07
 9 -5 -3 305.25 30.37
 -8 5 3 -0.17 7.68
 -8 -5 3 29.14 9.62
 -8 5 3 26.56 6
 8 -5 -3 9.31 5.71
 -7 5 3 272.95 24.24
 7 -5 -3 244.34 24.42
 -7 -5 3 284.46 25.65
 6 -5 -3 82.71 13.94
 -6 5 3 81.7 12.11
 -6 -5 3 104.61 15.18
 -5 -5 3 319.68 25.5
 -5 -5 3 266.78 15.85
 5 -5 -3 325.35 25.46
 4 -5 -3 40.54 9.69
 -4 -5 3 46.25 5.45
 -4 -5 3 54.68 10.35
 -3 -5 3 1317.9 48.97
 -3 -5 3 1214.82 20.47
 3 -5 -3 1285.88 47.58
 -3 -5 3 1217.61 19.35
 -3 5 3 1253.89 28.92
 2 -5 -3 952.44 40.44
 -2 5 3 965.68 29.89
 1 -5 -3 788.2 36.47
 0 5 3 266.09 8.64
 0 -5 3 258.84 9.61
 0 -5 -3 294.75 22.41
 0 5 -3 249.17 8.09
 1 -5 3 1062.38 27.23
 -1 5 -3 1116.8 24.32
 -1 -5 -3 1085.45 42.5
 -2 5 -3 22.37 4.23
 -2 -5 -3 24.87 6.9
 2 -5 3 18.8 4.56
 -3 -5 -3 9.38 4.54
 3 -5 3 7.5 3.55
 4 -5 3 148.49 15.76
 -4 -5 -3 142.45 16.89
 5 -5 3 100.66 14.48
 6 -5 3 445.17 32.56
 7 -5 3 126.39 18.69
 8 -5 3 470.82 37.75
 9 -5 3 455.88 39.47
 -9 5 -3 472.93 35.69
 -10 5 -3 0.92 5.74
 10 -5 3 5.04 6.67
 -11 5 -3 -1.84 4.29
 -11 -5 -3 -1.28 4.08
 11 -5 3 7.67 6.57
 12 -5 3 53.69 16.52
 -12 5 -3 59.53 14.04
 13 -5 3 167.18 29.12
 -13 5 -3 127.52 20.84
 -14 5 -3 57.41 14.32
 14 -5 3 29.06 13.24
 -15 5 -3 142.89 23.38
 15 -5 3 121.84 27.14
 -16 5 -3 25.7 10.06
 16 5 3 55.23 18.7
 16 -5 3 38.07 17.08
 -16 6 3 76.39 19.02
 16 -6 -3 76.26 22.58
 -15 6 3 8.19 8.92
 15 -6 -3 14.33 8.63
 -14 6 3 108.53 20.25
 -14 -6 3 98.36 20.06
 14 -6 -3 71.84 20.13
 -13 6 3 59.73 15.34
 -13 -6 3 76.3 17.55
 13 -6 -3 44.38 15.07
 12 -6 -3 4.12 5.75
 -12 6 3 -1.89 5.93
 -11 -6 3 35.86 12.18
 11 -6 -3 24.49 10.24
 -11 6 3 15.28 7.28
 -10 6 3 316.69 30.46
 -10 -6 3 323.6 31.07
 10 -6 -3 315.17 32.93
 -9 6 3 203.57 23.85
 -9 -6 3 192.17 23.33
 -9 6 3 202.77 15.05
 9 -6 -3 182.88 24.8
 -8 6 3 293.61 27.46
 -8 -6 3 306.46 28.33
 8 -6 -3 305.67 29.21
 -7 6 3 457.87 32.51
 -7 -6 3 474.31 33.79
 7 -6 -3 499.15 35.81
 6 -6 -3 90.83 14.84
 -6 6 3 63.23 10.7
 -6 -6 3 98.63 15.33
 -5 6 3 537.06 32.91
 -5 -6 3 538.94 34.06
 5 -6 -3 549.6 34.68
 -4 -6 3 102.33 9.39
 4 -6 -3 105.25 14.87
 -4 -6 3 106.83 8.25
 -4 6 3 96.42 6.67
 -4 -6 3 102.71 14.42
 3 -6 -3 75.5 12.52
 -3 -6 3 75.31 6.75
 -3 -6 3 75.26 5.91
 -2 -6 3 102.54 6.53
 -2 -6 3 113.36 5.93
 2 -6 -3 147.65 16.99
 -1 -6 3 86.91 5.53
 1 -6 -3 92.37 13.4
 0 -6 3 84 6.73
 0 -6 -3 101.42 14.39
 0 6 -3 87.67 6.42
 1 -6 3 278.2 14.93
 -1 6 -3 256.95 13.26
 -1 -6 -3 255.91 22.38
 2 -6 3 698.01 28.05
 -2 6 -3 660.19 23.78
 -2 -6 -3 699.49 36.78
 3 -6 3 101.93 12.14
 -3 -6 -3 108.7 15.09
 4 -6 3 320.12 24.2
 -4 -6 -3 314.67 26.06
 -5 -6 -3 28.05 2.98
 5 -6 3 37.46 9.2
 -6 -6 -3 4.62 2.38
 6 -6 3 -2.91 3.76
 7 -6 3 0.79 2.78
 -8 6 -3 266.24 26.55
 8 -6 3 287.37 30.29
 -9 6 -3 45.63 11
 9 -6 3 41.22 12.64
 10 -6 3 168.3 25.69
 -10 6 -3 149.97 21.38
 -11 6 -3 167.85 23.54
 11 -6 3 148.1 25.05
 -12 6 -3 23.09 9.69
 12 -6 3 34.14 13.88
 -13 6 -3 94.87 19.09
 13 -6 3 98.64 23.22
 -14 6 -3 13.67 8.55
 14 -6 3 3.35 5.05
 -15 6 -3 6.23 7.35
 15 -6 3 4.9 5.13
 -16 6 -3 -5.02 5.27
 16 -6 3 29.79 24.14
 16 -7 -3 41.97 17.29
 -15 7 3 18.89 10.56
 -15 -7 3 19.28 12.19
 15 -7 -3 -3.79 6.77
 -14 7 3 0.57 6.5
 -14 -7 3 13.55 9.75
 14 -7 -3 29.37 13.07
 -13 -7 3 7.34 8.87
 13 -7 -3 7.76 7.2
 -13 7 3 2.7 8.12
 -12 -7 3 218.14 28.18
 -12 7 3 197.28 26.85
 12 -7 -3 191.49 29.18
 -11 7 3 94.86 18.16
 -11 -7 3 135.86 21.68
 11 -7 -3 73.87 19.14
 -10 7 3 97.28 18.26
 -10 -7 3 97.04 17.45
 10 -7 -3 98.23 19.17
 -9 7 3 267.82 28.38
 -9 -7 3 282.05 28.81
 9 -7 -3 230.74 28.25
 -8 7 3 55.38 12.06
 -8 -7 3 78.04 15.01
 8 -7 -3 38.79 11.01
 7 -7 -3 45.8 11.68
 -7 7 3 46.3 10.29
 -7 -7 3 50.93 11.66
 6 -7 -3 60.55 13.08
 -6 7 3 47.45 9.95
 -6 -7 3 55.87 11.9
 -5 7 3 272.03 23.46
 -5 -7 3 254.11 24.72
 5 -7 -3 246.53 24.2
 -5 -7 3 246.08 15.2
 4 -7 -3 78.98 13.33
 -4 -7 3 83.69 8.11
 -4 -7 3 73.11 8.56
 -3 -7 3 634.63 22.25
 3 -7 -3 758.86 40.86
 -3 -7 3 749.29 21.74
 -2 -7 3 293.33 12.57
 2 -7 -3 283.58 24.73
 -1 -7 3 184.41 10.08
 1 -7 -3 171.5 19.44
 0 -7 3 330.23 15.14
 0 -7 -3 335.05 26.6
 0 7 -3 350.1 15.2
 -1 7 -3 20.65 4.25
 -1 -7 -3 20.05 7.05
 1 -7 3 20.83 4.45
 2 -7 3 117.41 11.89
 -2 -7 -3 116.05 16.28
 -3 -7 -3 22.62 7.74
 3 -7 3 22.43 6.09
 4 -7 3 88.22 13.08
 -4 -7 -3 97.17 15.51
 5 -7 3 95.37 14.62
 -5 -7 -3 103.74 16.3
 6 -7 3 484.72 35.07
 -6 -7 -3 461.08 15.41
 -7 7 -3 143.02 19.56
 -7 -7 -3 152.05 10.85
 7 -7 3 152.59 21.07
 -8 7 -3 137.59 19.99
 8 -7 3 159.57 23.29
 9 -7 3 103.74 19.68
 -9 7 -3 147.03 20.99
 -10 7 -3 0.09 5.54
 10 -7 3 -1.29 4.05
 -11 7 -3 1.09 5.41
 11 -7 3 -1.95 3.6
 -12 7 -3 39.67 12.55
 12 -7 3 32.75 12.66
 -13 7 -3 44.17 13.32
 13 -7 3 25.71 12.12
 -14 7 -3 1.04 4.39
 14 -7 3 -4.19 7.81
 -15 7 -3 65.58 16.84
 15 -7 3 17.41 11.63
 16 -7 3 2.02 5.2
 -15 8 3 26.01 11.92
 -15 -8 3 15.83 10.45
 15 -8 -3 12.06 10.18
 -14 8 3 121.28 22.83
 -14 -8 3 87.8 19.71
 14 -8 -3 95.8 22.74
 -13 -8 3 50.48 14.85
 13 -8 -3 22.16 11.25
 -13 8 3 33.57 11.35
 -12 8 3 36.54 12.29
 -12 -8 3 48.23 13.65
 12 -8 -3 51.85 16.41
 -11 -8 3 29.57 10.31
 -11 8 3 12.06 6.15
 11 -8 -3 24.73 11.27
 -10 8 3 11.32 6.49
 -10 -8 3 28.96 9.99
 10 -8 -3 16.26 7.57
 -9 8 3 4.07 5.75
 9 -8 -3 17.84 9.18
 -9 -8 3 16.23 8.93
 -8 8 3 23.07 7.83
 -8 -8 3 42.56 11.3
 8 -8 -3 38.59 11.71
 7 -8 -3 31.72 9.72
 -7 8 3 15.45 6.07
 -7 -8 3 42.62 11.26
 6 -8 -3 11.65 5.93
 -6 -8 3 14.94 6.94
 -6 8 3 2.96 4.82
 -6 -8 3 12.45 4.16
 5 -8 -3 82.5 14.81
 -5 -8 3 59.01 11.83
 -5 8 3 72.94 12.46
 -5 -8 3 72.6 8.95
 4 -8 -3 24.04 8.38
 -4 -8 3 17.87 4.11
 3 -8 -3 22.86 8.15
 -3 -8 3 20.35 4.13
 -2 -8 3 6.78 2.38
 2 -8 -3 1.56 4.3
 1 -8 -3 32.86 9.56
 -1 -8 3 79.07 8.96
 0 -8 -3 32.22 9.36
 0 8 -3 38.53 5.89
 0 -8 3 37.73 5.85
 1 -8 3 295.82 17.7
 -1 -8 -3 262.68 24.83
 2 -8 3 298.03 19.65
 -2 -8 -3 295.69 26.47
 3 -8 3 266.75 20.28
 -3 -8 -3 258.46 25.02
 4 -8 3 345.34 25.22
 -4 -8 -3 377.83 31.04
 -5 -8 -3 2.37 4
 5 -8 3 6.45 4.93
 -6 8 -3 -0.73 6.49
 -6 -8 -3 11.56 6.01
 6 -8 3 10.58 6.34
 -7 8 -3 7.48 4.47
 -7 -8 -3 2.38 5.08
 7 -8 3 11.23 7.45
 -8 8 -3 126.72 19.47
 8 -8 3 146.7 22.58
 -9 8 -3 91.65 17.17
 9 -8 3 69.98 16.57
 -10 8 -3 27.87 10.6
 10 -8 3 35.1 12.61
 11 -8 3 -2.21 4.84
 -11 8 -3 -3.97 7.1
 -12 8 -3 23.2 10.82
 12 -8 3 -0.75 6.27
 -13 8 -3 27.02 10.8
 13 -8 3 20.35 11.88
 -14 8 -3 32.02 13.47
 14 -8 3 -7.63 10.01
 -15 8 -3 30.87 13.84
 15 -8 3 5.45 8.69
 -14 9 3 -11.44 11.89
 -14 -9 3 0.88 5.99
 14 -9 -3 3.45 4.19
 -13 9 3 20.33 9.73
 -13 -9 3 14.21 9.38
 13 -9 -3 -0.53 5.9
 -12 9 3 41.01 13.06
 -12 -9 3 43.77 13.3
 12 -9 -3 33.72 13.47
 -11 9 3 24.34 11.21
 -11 -9 3 41.35 13.42
 11 -9 -3 37.84 13.49
 -10 9 3 145.7 23.03
 -10 -9 3 121.74 20.48
 10 -9 -3 145.28 24.8
 -9 9 3 274.79 29.4
 -9 -9 3 268.21 29.39
 9 -9 -3 255.92 30.92
 -8 -9 3 8.05 4.82
 -8 9 3 0.25 5.63
 8 -9 -3 7.56 6.16
 7 -9 -3 79.78 16.15
 -7 -9 3 61.4 13.56
 -7 9 3 81.1 15.64
 -7 -9 3 67.67 10.49
 -6 -9 3 254.74 26.43
 6 -9 -3 262.64 27.96
 -6 -9 3 252.64 18.81
 -6 9 3 265.34 25.95
 5 -9 -3 62 13.56
 -5 9 3 28.82 6.81
 -5 -9 3 59.58 8.63
 4 -9 -3 10.22 6.35
 -4 -9 3 4.19 2.45
 3 -9 -3 43.94 11
 -3 -9 3 52.9 7.38
 -2 -9 3 0.82 2.12
 2 -9 -3 -0.98 3.36
 1 -9 -3 1.11 3.71
 -1 -9 3 90.02 9.46
 0 -9 3 219.94 15.27
 0 -9 -3 248.21 25.03
 1 -9 3 303.97 19.2
 -1 -9 -3 285.65 26.68
 2 -9 3 214.12 17.55
 -2 -9 -3 231.09 24.76
 -3 -9 -3 60.15 12.97
 3 -9 3 78.56 11.59
 -4 -9 -3 13.06 7.24
 4 -9 3 10.83 5.32
 -5 9 -3 111.3 17.74
 5 -9 3 176.44 20.02
 -5 -9 -3 170.15 22.35
 6 -9 3 399.65 32.45
 -6 -9 -3 446.6 37.59
 -6 9 -3 430.95 35.17
 -7 9 -3 89.88 16.63
 -7 -9 -3 96.79 18.33
 7 -9 3 108.92 18.35
 -8 -9 -3 -0.21 6.09
 8 -9 3 -1.66 5.24
 -8 9 -3 0.05 4.05
 -9 9 -3 -0.82 4.64
 9 -9 3 2.9 4.16
 -10 9 -3 5.76 5.72
 10 -9 3 3.71 5.05
 -11 9 -3 9.03 7.36
 11 -9 3 0.7 3.86
 -12 9 -3 13.47 10.1
 12 -9 3 -4.78 5.27
 -13 9 -3 14.7 10.04
 13 -9 3 -4.13 8.41
 -14 9 -3 21.05 12.02
 14 -9 3 2.73 6.53
 15 -9 3 -2.33 5.19
 -14 -10 3 0.99 5.73
 14 -10 -3 3.78 7.07
 -13 10 3 5.68 6.63
 -13 -10 3 9.43 10.1
 13 -10 -3 -0.7 5.96
 -12 10 3 0.92 7.83
 12 -10 -3 4.89 4.48
 -12 -10 3 1.11 4.65
 -11 10 3 15.18 9.56
 11 -10 -3 14.75 8.65
 -11 -10 3 13.24 8.38
 -10 10 3 4.16 6.68
 10 -10 -3 6.14 5.39
 -10 -10 3 22.66 9.89
 -9 -10 3 52.24 13.78
 -9 10 3 66.46 15.96
 9 -10 -3 68.71 17.45
 8 -10 -3 38.22 12.06
 -8 -10 3 69.39 15.42
 -8 10 3 45.49 11.84
 7 -10 -3 42.64 12.39
 -7 10 3 56.01 12.69
 6 -10 -3 22.71 9.15
 -6 10 3 17.87 7.36
 5 -10 -3 1.92 3.49
 -5 10 3 -8.38 9.03
 -5 -10 3 5.41 3.28
 4 -10 -3 67.17 14.16
 -4 -10 3 50.19 8.14
 3 -10 -3 56.23 12.81
 -3 -10 3 56.32 8.21
 -2 -10 3 1.04 2.13
 2 -10 -3 4.06 5.21
 1 -10 -3 27.78 9.56
 -1 -10 3 48.92 8
 0 -10 3 267.52 18.17
 0 -10 -3 265.4 27.5
 -1 -10 -3 63.02 13.42
 1 -10 3 67.45 9.9
 -2 -10 -3 76.91 14.79
 2 -10 3 81.65 11.36
 -3 -10 -3 100.8 17.11
 -3 10 -3 104.14 15.91
 3 -10 3 77.62 11.89
 -4 10 -3 0.1 5.31
 -4 -10 -3 0.6 4.93
 4 -10 3 -2.38 2.82
 -5 10 -3 -0.6 4.67
 -5 -10 -3 3.14 4.51
 5 -10 3 4.02 4.18
 -6 10 -3 6.55 4.26
 -6 -10 -3 22.97 8.96
 6 -10 3 20.01 8.21
 -7 10 -3 13.02 7.28
 -7 -10 -3 3.92 4.74
 7 -10 3 14.38 7.1
 -8 -10 -3 105.28 20.29
 8 -10 3 132.26 22.18
 -8 10 -3 101.71 18.48
 -9 10 -3 21.02 8.8
 -9 -10 -3 24.87 10.95
 9 -10 3 24.55 10.54
 -10 10 -3 5.49 6.52
 -10 -10 -3 7.6 8.62
 10 -10 3 6.1 7.96
 -11 10 -3 9.96 7.99
 11 -10 3 5.4 7.74
 -12 10 -3 9.74 7.34
 12 -10 3 3.92 7.82
 -13 10 -3 12.52 8.98
 13 -10 3 -0.96 6.6
 14 -10 3 3.77 5.57
 -13 11 3 17.79 10.44
 13 -11 -3 5.6 7.04
 -13 -11 3 -4.75 7.47
 -12 11 3 13.05 11.05
 12 -11 -3 7.21 6.99
 -12 -11 3 -4.11 7.57
 -11 -11 3 3.66 6.05
 -11 11 3 -1.82 6.9
 11 -11 -3 0.8 6.43
 -10 -11 3 50.42 13.66
 -10 11 3 48.82 13.97
 10 -11 -3 47.82 14.66
 -9 -11 3 -5.76 8.07
 -9 11 3 -1.03 5.64
 9 -11 -3 2.55 4.84
 8 -11 -3 3.19 4.87
 -8 11 3 -11.46 9.44
 7 -11 -3 -0.58 5.5
 -7 11 3 -8.54 7.9
 6 -11 -3 33.2 11.31
 -6 11 3 39.21 10.41
 -5 11 3 -7.72 7.82
 5 -11 -3 3.78 6.15
 4 -11 -3 5.81 5.92
 3 -11 -3 115.26 19.41
 -2 -11 3 49.77 8.33
 2 -11 -3 45.06 11.81
 1 -11 -3 3.64 5.19
 -1 -11 3 -0.41 2.67
 0 -11 -3 85.05 15.94
 0 -11 3 86.14 11.33
 -1 11 -3 10.45 5.41
 -1 -11 -3 -0.81 4.78
 1 -11 3 8.88 4.47
 -2 -11 -3 42.85 11.83
 -2 11 -3 53.25 10.9
 2 -11 3 37.3 8.36
 -3 11 -3 41.43 10.58
 -3 -11 -3 43.2 11.68
 3 -11 3 50.83 10.41
 -4 11 -3 37.28 10.07
 -4 -11 -3 34.99 11.34
 4 -11 3 28.66 8.3
 -5 11 -3 29.24 9.6
 -5 -11 -3 23 9.35
 5 -11 3 10.39 5.85
 -6 -11 -3 31.69 10.62
 6 -11 3 20.88 7.35
 -6 11 -3 31.24 10.81
 -7 11 -3 10.74 7.13
 -7 -11 -3 34.04 11.88
 7 -11 3 23.12 9.29
 -8 11 -3 12.89 9.1
 -8 -11 -3 1.48 3.98
 8 -11 3 -0.27 6.12
 -9 11 -3 11.96 8.45
 -9 -11 -3 3.94 6.71
 9 -11 3 -3.84 5.77
 -10 -11 -3 4.54 6.42
 -10 11 -3 70.33 17.21
 10 -11 3 80.04 20.58
 -11 11 -3 50.12 15.58
 -11 -11 -3 71.52 19.23
 11 -11 3 39.67 13.77
 -12 11 -3 15.15 11.2
 -12 -11 -3 15.68 9.95
 12 -11 3 13.48 10.53
 -13 11 -3 10.24 10.35
 13 -11 3 19.79 13.12
 14 -11 3 3.17 4.92
 -13 -12 3 -5.21 10.23
 -12 -12 3 -2.03 7.19
 -12 12 3 7.42 5.83
 12 -12 -3 6.58 8.27
 -11 -12 3 -8.1 7.15
 -11 12 3 -3.75 8.2
 11 -12 -3 5.88 7.94
 -10 -12 3 1.71 4.72
 -10 12 3 7.75 10
 10 -12 -3 6.38 7.76
 -9 12 3 3.39 6.29
 9 -12 -3 8.54 7.12
 8 -12 -3 26.34 11.33
 -8 12 3 19.29 8.55
 7 -12 -3 72.76 17.21
 -7 12 3 61.14 15.09
 6 -12 -3 3.46 5.29
 -6 12 3 -0.05 7.66
 5 -12 -3 86.36 17.69
 -5 12 3 50.77 11.6
 4 -12 -3 40.6 13.03
 3 -12 -3 5.49 6.58
 2 12 -3 -5.39 5.06
 2 -12 -3 -3.44 5.35
 1 12 -3 10.76 5.38
 1 -12 -3 -0.02 4.13
 0 12 -3 1.34 3.83
 0 -12 -3 3.2 4.64
 -1 12 -3 121.34 16.94
 -1 -12 -3 87.57 17.23
 1 -12 3 106.68 13.9
 -2 12 -3 51.14 11.37
 -2 -12 -3 67.2 15.48
 2 -12 3 82.33 12.73
 -3 -12 -3 14.64 7.83
 -3 12 -3 9.06 6.07
 3 -12 3 1.68 2.93
 -4 12 -3 21.3 9.22
 -4 -12 -3 10.36 6.9
 4 -12 3 14.88 6.63
 -5 12 -3 4.23 5.06
 -5 -12 -3 17.72 8.66
 5 -12 3 12.22 6.34
 -6 12 -3 8.98 7.08
 -6 -12 -3 6.87 7.44
 6 -12 3 10.65 6.47
 -7 -12 -3 -2.55 4.53
 7 -12 3 1.35 3.66
 -8 12 -3 21.43 9.83
 -8 -12 -3 6.14 7.36
 8 -12 3 4.19 4.72
 -9 -12 -3 1.75 4.19
 9 -12 3 5.41 7.28
 -10 12 -3 40.96 13.9
 -10 -12 -3 41.74 14.93
 10 -12 3 23.05 11.24
 -11 12 -3 64.92 17.01
 -11 -12 -3 60.75 17.84
 11 -12 3 52.7 17.31
 -12 12 -3 95.55 21.57
 -12 -12 -3 71.92 20.53
 12 -12 3 76.78 20.54
 13 -12 3 35.09 15.46
 -12 -13 3 24.58 11.44
 -11 13 3 55.69 15.39
 11 -13 -3 72.99 20.55
 -10 13 3 25.93 10.98
 10 -13 -3 38.82 13.44
 -9 13 3 53.54 15.27
 9 -13 -3 47.48 15.45
 8 -13 -3 -3.35 5.97
 -8 13 3 3.05 7
 7 -13 -3 -5.54 5.18
 -7 13 3 -9.07 7.69
 6 -13 -3 10.43 6.95
 -6 13 3 5.89 7.03
 5 -13 -3 49.89 14.31
 -5 13 3 42.2 10.61
 4 -13 -3 24.97 10.67
 3 -13 -3 67.57 15.52
 2 -13 -3 11.32 7.18
 1 -13 -3 8.72 7.76
 0 13 -3 55.18 11.4
 0 -13 -3 60.19 14.95
 -1 -13 -3 4.66 5.24
 -1 13 -3 6.52 5.49
 -2 -13 -3 21.22 9.17
 -2 13 -3 21.59 8.12
 -3 13 -3 -0.89 4.86
 -3 -13 -3 9.43 6.88
 -4 13 -3 42.47 11.63
 -4 -13 -3 42.63 13.18
 4 -13 3 34.23 9.78
 -5 13 -3 23.77 9.57
 -5 -13 -3 17.37 9.53
 5 -13 3 13.65 6.79
 -6 13 -3 96.07 18.58
 -6 -13 -3 81.47 18.1
 6 -13 3 81.59 16.61
 -7 -13 -3 53.26 15.94
 -7 13 -3 46.44 14.06
 7 -13 3 51.9 13.73
 -8 13 -3 22.62 11
 -8 -13 -3 37.87 13.35
 8 -13 3 46.57 14.36
 -9 13 -3 25.56 11.67
 -9 -13 -3 19.62 10.73
 9 -13 3 15.94 9.28
 -10 13 -3 50.11 16.27
 -10 -13 -3 33.18 13.33
 10 -13 3 68.33 18.89
 -11 13 -3 -0.35 8.29
 -11 -13 -3 17.94 10.52
 11 -13 3 17.36 10.09
 12 -13 3 2.4 6.78
 13 -13 3 16.6 9.73
 -10 14 3 13.63 8.64
 10 -14 -3 12.58 9.22
 -9 14 3 53.39 15.56
 9 -14 -3 58.49 18.28
 8 -14 -3 99.62 21.97
 -8 14 3 93.18 19.08
 7 -14 -3 177.73 28.28
 -7 14 3 137.81 21.63
 -6 14 3 28.42 9.43
 6 -14 -3 37.6 12.63
 5 -14 -3 39.05 12.47
 4 -14 -3 27.77 11.25
 3 -14 -3 6.51 7.27
 2 -14 -3 37.5 12.39
 1 -14 -3 63.41 15.93
 0 -14 -3 40.96 12.94
 -1 14 -3 106.43 16.75
 -1 -14 -3 74.89 17.28
 -2 -14 -3 216.91 28.9
 -2 14 -3 193.42 23.02
 -3 14 -3 127.79 19.6
 -3 -14 -3 102.53 20.72
 -4 -14 -3 203.26 28.91
 -4 14 -3 203.51 25.72
 -5 14 -3 39.52 12.76
 -5 -14 -3 22.62 11.36
 -6 14 -3 6.41 8.57
 -6 -14 -3 3.43 6.32
 -7 14 -3 40.37 13.69
 -7 -14 -3 0.64 3.57
 -8 14 -3 81.16 18.63
 -8 -14 -3 76.94 18.82
 -9 14 -3 22.69 10.68
 -9 -14 -3 3.66 5.92
 9 -14 3 7.43 8.15
 -10 14 -3 5.36 6.44
 -10 -14 -3 -1.73 5.89
 10 -14 3 7.89 8.29
 11 -14 3 20.91 12.82
 -9 15 3 82.56 20.14
 8 -15 -3 6.48 8.43
 -8 15 3 -8.14 8.01
 7 -15 -3 6.26 6.71
 -7 15 3 -6.33 8.72
 6 -15 -3 22.87 10.33
 -6 15 3 1.28 5.95
 5 -15 -3 46.92 15.06
 4 -15 -3 35.2 13.05
 3 -15 -3 84.24 19.05
 2 -15 -3 4.59 6.74
 1 -15 -3 1.06 3.97
 0 -15 -3 152.65 25.61
 -1 -15 -3 23.97 10.78
 -2 -15 -3 -4.54 7.53
 -3 15 -3 30.95 10.52
 -3 -15 -3 28.22 11.9
 -4 15 -3 140.31 21.65
 -4 -15 -3 95.87 21.19
 -5 15 -3 118.49 20.75
 -5 -15 -3 96.98 21.22
 -6 -15 -3 222.32 32.43
 -6 15 -3 239.68 30.04
 -7 15 -3 93.89 18.61
 -7 -15 -3 83.51 20.06
 -8 15 -3 62.79 16.1
 -8 -15 -3 48.8 16.68
 -9 15 -3 13.16 8.41
 -9 16 3 30.86 11.5
 -8 16 3 75.03 17.96
 -7 16 3 104.72 19.89
 6 -16 -3 50.39 15.8
 5 -16 -3 28.51 11.28
 4 -16 -3 6.95 5.97
 3 -16 -3 13.92 8.8
 2 -16 -3 36.1 14.38
 1 -16 -3 3.95 4.48
 0 -16 -3 11.43 10.54
 -1 -16 -3 72.02 18.31
 -2 -16 -3 90 20.14
 -3 -16 -3 136.75 25.11
 -4 -16 -3 269.37 35.79
 -5 16 -3 68.16 16.06
 -5 -16 -3 67.41 18.25
 -6 16 -3 -0.37 5.86
 -6 -16 -3 2.12 7.69
 -7 16 -3 -11.38 9.82
 -8 16 -3 53.47 15.46
 -9 16 -3 62.89 17.36
 -8 17 3 -18.63 10.21
 3 -17 -3 49.08 15.55
 2 -17 -3 37.57 14.08
 1 -17 -3 17.84 9.94
 0 -17 -3 -1.33 5.97
 -1 -17 -3 -9.23 9.17
 -2 -17 -3 8.77 6.34
 -3 -17 -3 9.3 8.21
 -4 -17 -3 1.3 6.93
 -7 17 -3 61.79 16.48
 -8 17 -3 18.68 10.71
 16 0 -4 -7.45 7.51
 15 0 -4 92.35 22.15
 14 0 -4 -1.88 5.41
 13 0 -4 61.55 16.56
 12 0 -4 12.34 7.6
 11 0 -4 41 12.5
 10 0 -4 7.01 6.41
 9 0 -4 978.71 51.41
 8 0 -4 584.08 36.98
 -7 0 4 261.41 23.97
 7 0 -4 235.32 21.32
 -6 0 4 70.11 10.79
 6 0 -4 78.73 11.33
 -6 0 4 66.91 12.66
 -5 0 4 393.03 26.32
 5 0 -4 399.49 22.91
 -5 0 4 399.98 25.05
 -4 0 4 2.1 3.52
 -4 0 4 1.64 4.5
 4 0 -4 -0.43 2.1
 -3 0 4 315.27 21.59
 -3 0 4 288.55 20.95
 3 0 -4 312.37 16.96
 -2 0 4 140.55 13.82
 -2 0 4 127.11 14.05
 2 0 -4 143.82 11.16
 -2 0 4 131.68 10.63
 -1 0 4 38.59 8.46
 1 0 -4 42.98 6.22
 0 0 4 318.02 22.02
 0 0 -4 301.82 16.38
 -1 0 -4 16.13 4.54
 1 0 4 31.28 8.02
 2 0 4 160.67 16.52
 -2 0 -4 152.89 12.84
 3 0 4 423.54 25.74
 3 0 4 396.6 30.17
 4 0 4 5.36 5.08
 4 0 4 13.38 6.26
 5 0 4 55.02 10.45
 5 0 4 59.8 13.35
 6 0 4 207.58 18.4
 6 0 4 200.21 24.59
 7 0 4 636.65 32.19
 7 0 4 641.52 45.12
 8 0 4 285.04 22.01
 8 0 4 252.9 29.43
 9 0 4 482.72 28.51
 9 0 4 477.83 41.55
 10 0 4 20.6 6.38
 10 0 4 17.19 8.72
 11 0 4 69.76 11.05
 11 0 4 53.24 15.8
 12 0 4 5.74 6.79
 -12 0 -4 -10.92 7.73
 -13 0 -4 48.76 12.54
 13 0 4 47.28 15.06
 -14 0 -4 8.94 5.94
 14 0 4 6.95 8.01
 -15 0 -4 7.96 5.77
 15 0 4 -1.02 7.12
 -16 0 -4 5.1 6.71
 16 0 4 -3.74 7.98
 17 -1 -4 3.73 5.61
 16 -1 -4 102.73 23.99
 15 1 -4 5.79 8.17
 15 -1 -4 23.2 14.62
 14 1 -4 35.01 12.9
 14 -1 -4 24.39 11.8
 13 1 -4 169.87 26.52
 13 -1 -4 185.02 28.53
 12 1 -4 83.18 17.88
 12 -1 -4 88.01 18.87
 11 1 -4 291.82 30.62
 11 -1 -4 236.98 29.15
 10 1 -4 67.99 14.32
 10 -1 -4 67.87 14.57
 -9 -1 4 67.65 15.19
 9 1 -4 52.08 11.54
 9 -1 -4 48.45 11.82
 -8 1 4 -1.34 3.07
 8 1 -4 3.42 4.47
 8 -1 -4 6.4 5.06
 -7 -1 4 569.83 35.15
 7 1 -4 568.18 32.99
 7 -1 -4 542.06 33.05
 -7 1 4 587.77 30.05
 -6 1 4 381.68 26.56
 -6 -1 4 371.96 27.16
 6 1 -4 385.47 24.72
 6 -1 -4 368.09 25.29
 -6 1 4 363.47 23.62
 -5 1 4 1056.88 41.83
 -5 -1 4 1028.02 43.38
 5 1 -4 1010.58 35.32
 -5 1 4 1018.68 39.23
 5 -1 -4 1070.33 39.32
 -5 -1 4 1008.93 40.17
 -4 1 4 1152.89 41.53
 -4 -1 4 1170.85 44.79
 -4 1 4 1191.31 42.5
 4 1 -4 1209.36 33.76
 4 -1 -4 1153.31 38.11
 -4 -1 4 1179.24 31.82
 -4 -1 4 1188.69 43.65
 -3 1 4 62.94 10.25
 -3 -1 4 57.07 9.71
 3 1 -4 53.61 6.3
 3 -1 -4 60.3 8.15
 -3 -1 4 48.44 5.84
 -3 1 4 58.02 9.28
 -3 -1 4 54.53 9.27
 -2 -1 4 36 7.36
 2 -1 -4 45.29 7.11
 2 1 -4 43.03 5.11
 -2 -1 4 44 7.86
 -2 1 4 50.81 8.03
 -2 1 4 43.32 8.56
 -1 1 4 14.68 4.31
 1 1 -4 19.29 3.45
 1 -1 -4 23.5 5.01
 -1 -1 4 22.53 6.26
 -1 1 4 19.1 6.89
 0 1 -4 14.7 3.37
 0 -1 -4 16.18 4.52
 0 -1 4 14.49 5.62
 0 1 4 16.8 6.27
 1 -1 4 22.84 7.01
 -1 1 -4 12.41 3.89
 -1 -1 -4 18.28 4.78
 -1 1 -4 14.21 3.47
 2 -1 4 238.04 19.4
 -2 -1 -4 236.21 17.18
 2 1 4 251.73 22.94
 3 -1 4 26.43 6.88
 3 1 4 14.78 5.42
 4 -1 4 699.7 33.07
 4 1 4 695.99 41.9
 5 -1 4 485.19 27.74
 5 -1 4 477.95 36.23
 5 1 4 472 35.78
 6 -1 4 127.3 14.54
 6 -1 4 135.88 19.78
 6 1 4 142.99 20.74
 7 -1 4 355.95 24.06
 7 -1 4 419.62 36.13
 7 1 4 384.27 35.17
 8 -1 4 1.98 4.68
 8 -1 4 7.98 5.11
 8 1 4 5.27 5.5
 9 -1 4 47.98 9.1
 9 -1 4 58.72 14.5
 9 1 4 39.96 12.9
 10 -1 4 159.74 16.03
 10 -1 4 173.61 25.97
 10 1 4 154.11 24.83
 11 -1 4 153.54 15.76
 11 -1 4 107.27 21.61
 11 1 4 136.37 23.77
 -12 1 -4 14.9 6.7
 12 -1 4 27.18 11.37
 12 1 4 36.18 13.5
 -13 -1 -4 214.68 25.81
 13 -1 4 175.91 28.35
 -13 1 -4 193.3 25.37
 13 1 4 188.06 30.1
 -14 -1 -4 62.84 14.14
 -14 1 -4 49.96 13.49
 14 -1 4 77.6 19.23
 14 1 4 67.93 19.23
 -15 1 -4 -1.45 3.92
 -15 -1 -4 13.77 8.13
 15 -1 4 7.04 7.29
 15 1 4 -0.25 5.35
 -16 -1 -4 6.03 6.59
 -16 1 -4 17.76 9.67
 16 -1 4 2.62 7.05
 16 1 4 3.6 6.65
 -17 1 -4 -0.66 3.98
 17 -2 -4 2.63 6.55
 16 -2 -4 10.76 9.62
 -15 -2 4 63.6 17.89
 15 -2 -4 85.3 21.28
 -14 -2 4 8.45 8.68
 14 2 -4 11.75 8.15
 14 -2 -4 -2.11 6.08
 -13 -2 4 35.27 13.16
 13 2 -4 40.21 13.01
 13 -2 -4 34.73 13.17
 -12 -2 4 37.37 12.84
 12 2 -4 24.25 9.74
 12 -2 -4 6.97 5.92
 -11 -2 4 79.33 16.7
 11 2 -4 54.57 13.99
 11 -2 -4 55.45 13.95
 -10 -2 4 35.95 11.44
 10 2 -4 15.46 6.93
 10 -2 -4 12.44 6.63
 -9 -2 4 179.25 22.51
 9 2 -4 178.43 21.05
 9 -2 -4 161.4 21.68
 -9 2 4 173.76 16.4
 -8 -2 4 173.21 20.83
 8 2 -4 149.03 17.83
 8 -2 -4 162.97 19.87
 -8 2 4 149.85 15.2
 -7 -2 4 178.28 20.77
 7 2 -4 138.08 15.79
 7 -2 -4 139.73 17.32
 -7 2 4 130.69 14.3
 -6 2 4 65.66 9.93
 -6 -2 4 88.76 14.34
 6 2 -4 53.83 8.97
 6 -2 -4 59.03 10.65
 -5 -2 4 116.45 15.64
 -5 2 4 109.03 13.28
 5 2 -4 108.1 11.12
 5 -2 -4 96.77 12.57
 5 -2 -4 111.69 10.05
 -4 -2 4 -4.01 4.22
 4 -2 -4 2.55 3.18
 -4 -2 4 0.14 0.77
 -4 2 4 9.42 6.05
 4 2 -4 -0.19 1.65
 -4 -2 4 1.91 4.07
 -4 2 4 3.88 3.75
 -3 2 4 72.55 9.97
 3 2 -4 64.49 6.12
 3 -2 -4 69.69 9.67
 -3 -2 4 57.98 4.99
 -3 2 4 65.17 10.32
 -3 -2 4 64.75 10.82
 -3 -2 4 68.14 10.78
 -2 2 4 425.75 25.69
 -2 2 4 406.95 21.45
 -2 -2 4 401.35 25.77
 2 2 -4 394.02 11.51
 2 -2 -4 431.55 23.7
 -2 -2 4 395.8 25.62
 -1 2 4 19.97 4.62
 1 -2 -4 17.75 4.99
 1 2 -4 22.38 3.14
 1 2 -4 24.55 2.72
 -1 -2 4 31.25 7.59
 0 -2 4 80.74 11.75
 0 2 -4 75.87 6.82
 0 2 -4 67.4 5.65
 0 -2 -4 70.34 9.53
 0 2 4 65.19 10.51
 -1 -2 -4 12.65 4.98
 -1 2 -4 8.95 2.47
 -1 2 -4 12.49 3.31
 1 2 4 12.46 5.23
 1 -2 4 7.82 4.34
 -2 -2 -4 274.97 14.04
 -2 2 -4 278.84 18.35
 2 -2 4 293.29 21.71
 -2 -2 -4 282.09 20.13
 2 2 4 288.74 24.43
 -3 -2 -4 692.96 22.73
 3 -2 4 764.31 34.52
 -3 -2 -4 762.25 34.28
 3 2 4 738.25 41.42
 4 -2 4 55.18 9.22
 4 2 4 64.28 13.05
 5 2 4 4.72 4.9
 5 -2 4 2.71 2.65
 6 -2 4 140.6 15.17
 6 2 4 156.64 21.83
 7 -2 4 162.25 16.01
 7 2 4 207.39 25.75
 8 2 4 49.05 13.27
 8 -2 4 55.87 9.54
 8 -2 4 41.88 11.95
 9 -2 4 189.66 17.47
 9 2 4 188.75 26.88
 9 -2 4 152.98 23.49
 10 -2 4 2.04 3.73
 10 -2 4 -1.67 6.31
 11 2 4 0.9 5.76
 11 -2 4 -0.88 6.3
 12 2 4 12.54 11.72
 -12 2 -4 -8.12 8.51
 12 -2 4 0.96 6.77
 13 2 4 49.75 16.27
 -13 2 -4 28.51 9.78
 -13 -2 -4 43.1 11.05
 13 -2 4 36.89 13.3
 14 2 4 14.41 10.68
 -14 2 -4 1.08 4.51
 -14 -2 -4 6.85 5.87
 14 -2 4 -2.17 7.13
 -15 2 -4 5.62 6.06
 15 -2 4 5.22 9.4
 -15 -2 -4 -3.93 6.05
 15 2 4 5.79 9.15
 -16 2 -4 1.74 3.46
 16 -2 4 -6.65 10.5
 16 2 4 -2.09 7.47
 17 -3 -4 -6.84 8.29
 16 -3 -4 38.13 15.57
 -15 -3 4 44.68 16.27
 15 -3 -4 8.29 5.48
 -14 -3 4 31.16 12.46
 14 -3 -4 17.14 9.42
 -13 -3 4 66.88 17.35
 13 -3 -4 78.39 19.09
 -12 -3 4 44.03 15.78
 12 3 -4 56.84 15.49
 12 -3 -4 15.12 9.61
 -11 -3 4 92.07 17.69
 11 3 -4 83.37 16.59
 11 -3 -4 79.57 17.56
 -10 -3 4 25.76 10.12
 10 3 -4 36.98 10.67
 10 -3 -4 31.97 10.53
 -9 -3 4 47.24 12.8
 9 3 -4 38.78 9.91
 -9 3 4 37.71 7.68
 9 -3 -4 51.53 12.48
 -8 3 4 -0.38 2.89
 8 3 -4 2.37 2.55
 8 -3 -4 2.2 2.62
 -7 -3 4 238.39 24.5
 7 3 -4 161.08 16.32
 -7 3 4 192.52 17.06
 7 -3 -4 194.76 21.09
 -6 3 4 12.63 5.32
 6 3 -4 2.79 2.77
 -6 -3 4 7.23 6.07
 6 -3 -4 6.51 4.08
 -5 3 4 169.74 16.32
 -5 -3 4 159.36 18.5
 5 3 -4 151.49 11.86
 5 -3 -4 143.33 16.06
 -5 -3 4 149.02 10.11
 -4 3 4 210.09 18.23
 -4 -3 4 223.78 21.2
 4 -3 -4 210.84 18.55
 -4 -3 4 201.26 9.07
 -3 -3 4 108.87 14.45
 -3 3 4 112.48 11.7
 3 -3 -4 108.18 13.01
 -2 3 4 378.41 19.64
 2 -3 -4 386.74 24.18
 1 -3 -4 58.77 9.4
 -1 3 4 62.5 7.46
 -1 -3 4 105.18 15.3
 -1 3 4 90.84 11.83
 0 -3 -4 62.9 9.75
 0 -3 4 112.56 15.31
 0 3 4 75.7 12.01
 -1 3 -4 412.87 15.24
 1 -3 4 372.4 25.11
 -1 -3 -4 383.22 24.48
 -1 3 -4 405.69 13.71
 1 3 4 397.44 27.44
 -2 3 -4 1482.68 36.37
 2 -3 4 1512.17 50.26
 -2 -3 -4 1466.19 48.51
 2 3 4 1510.05 56.65
 -3 -3 -4 184.92 9.9
 3 -3 4 175.14 16.87
 -3 -3 -4 165.43 16.98
 3 3 4 175.95 20.28
 4 -3 4 128.18 14.74
 4 3 4 137.52 19.03
 5 -3 4 317.13 22.83
 5 3 4 334.08 30.85
 6 -3 4 153.59 16.21
 6 3 4 154.76 21.95
 7 3 4 132.92 20.74
 7 -3 4 143.43 15.42
 8 3 4 4.73 7.96
 8 -3 4 3.74 3.6
 9 3 4 25.14 11.24
 9 -3 4 9.35 3.32
 10 3 4 27.18 12.13
 10 -3 4 22.78 6.78
 11 3 4 137.31 24.53
 -11 3 -4 95.25 17.52
 -12 3 -4 -5.87 7.86
 12 3 4 12.58 10.03
 -13 -3 -4 13.03 7.09
 13 3 4 9.06 8.71
 -13 3 -4 31.58 11.99
 14 3 4 25.44 11.56
 -14 3 -4 17.43 8.23
 15 3 4 13.05 9.67
 -15 3 -4 16.89 9.09
 -16 3 -4 12.33 8.56
 16 -4 -4 -2.39 6.54
 -15 -4 4 16.67 11.43
 15 -4 -4 11.15 9.32
 -14 -4 4 21.15 11.66
 14 -4 -4 11.02 8.34
 -13 -4 4 7.78 8.44
 13 -4 -4 7.54 7.44
 -12 -4 4 2.72 7.61
 12 -4 -4 -0.34 4.41
 -11 -4 4 12.42 10.51
 11 -4 -4 3.96 4.9
 -10 -4 4 62.75 14.8
 10 -4 -4 40.08 11.83
 -9 -4 4 177.39 23.11
 9 -4 -4 127.99 19.43
 -9 4 4 139.39 14.47
 -8 4 4 12.24 5.43
 -8 -4 4 17.57 9.05
 8 -4 -4 10.96 7.05
 -7 4 4 19.03 6.04
 -7 -4 4 33.85 14.34
 7 -4 -4 15.03 6.4
 -6 4 4 126.69 14.25
 6 -4 -4 108.25 15.5
 -6 -4 4 114.55 16.37
 5 -4 -4 49.22 10.28
 -5 -4 4 31.82 8.6
 -4 -4 4 40.99 8.96
 4 -4 -4 41.17 8.87
 3 -4 -4 26.99 7.27
 -3 -4 4 19.55 6.2
 -3 4 4 45.48 7.89
 2 -4 -4 2.81 3.66
 -2 4 4 10.42 4.41
 -2 4 4 -0.01 2.37
 1 -4 -4 10.17 4.08
 -1 4 4 9.25 3.04
 -1 4 4 8.32 4.37
 0 -4 -4 195.57 18.22
 0 4 4 188 17.83
 1 4 4 85.96 12.79
 -1 -4 -4 77.33 11.79
 -1 4 -4 69.64 5
 -2 4 -4 130.16 9.65
 -2 -4 -4 131.13 15.64
 2 -4 4 144.38 16.15
 2 4 4 135.76 17.38
 3 4 4 20.89 9
 3 -4 4 8.82 4.49
 -3 -4 -4 7.19 4.37
 4 -4 4 4.47 3.95
 4 4 4 13.22 7.58
 -4 -4 -4 13.29 6.08
 -4 -4 -4 5.53 1.62
 5 4 4 36.72 12.04
 5 -4 4 19.9 6.13
 6 4 4 15.21 8.95
 6 -4 4 9.57 5
 7 4 4 30.2 12.63
 7 -4 4 17.66 5.28
 8 4 4 -1.83 6.49
 8 -4 4 2.41 3.24
 8 -4 4 3.25 4.18
 9 4 4 40.43 14.89
 9 -4 4 47.56 8.99
 9 -4 4 26.06 10.33
 10 4 4 40.9 15.29
 10 -4 4 38.61 13.08
 -11 4 -4 32.17 10.62
 11 4 4 63.67 18.1
 -12 4 -4 5 4.21
 12 4 4 14.96 14.38
 13 4 4 24 12.09
 -13 4 -4 22.27 9.99
 -14 4 -4 3.15 6.21
 14 4 4 2.87 6.45
 15 4 4 -2.48 6.65
 -15 4 -4 2.24 4.9
 -16 4 -4 4.68 6.01
 16 -5 -4 4.07 9.06
 -15 -5 4 13.36 8.54
 15 -5 -4 0.73 6.98
 -14 -5 4 36.18 12.87
 14 -5 -4 13.17 9.52
 -13 -5 4 31.83 13.36
 13 -5 -4 25.46 12.84
 -12 -5 4 19.61 10.91
 12 -5 -4 -0.44 4.11
 -11 -5 4 7.71 7.08
 11 -5 -4 -1.34 5.67
 -10 -5 4 19.72 9.83
 10 -5 -4 14.78 7.8
 -9 5 4 32.03 7.26
 -9 -5 4 30.51 11.07
 9 -5 -4 37.28 11.56
 -8 5 4 1.95 3.52
 -8 -5 4 -2.02 5.34
 8 -5 -4 1.32 3.58
 -7 5 4 87.95 11.92
 -7 -5 4 92.82 15.88
 7 -5 -4 89.11 15.2
 6 -5 -4 -1.73 3.07
 -6 -5 4 -0.31 4.74
 5 -5 -4 60.65 11.85
 -5 -5 4 77.67 13.78
 -4 -5 4 38.55 8.99
 4 -5 -4 32.55 8.25
 3 -5 -4 65 11.35
 -2 5 4 106.29 9.68
 2 -5 -4 85.58 13.21
 -2 5 4 89.99 10.66
 1 -5 -4 13.81 6.37
 -1 5 4 16.41 3.48
 -1 5 4 11.35 5.68
 0 5 4 77.1 12.4
 0 -5 -4 64.1 10.91
 1 5 4 34.69 9.99
 -1 -5 -4 11.09 5.22
 -1 5 -4 18.23 2.59
 -2 5 -4 0.24 0.77
 -2 -5 -4 -4.69 4.47
 -3 -5 -4 192.02 20.2
 4 -5 4 34.74 7.68
 -4 -5 -4 29.03 8.3
 5 -5 4 18.46 5.93
 -5 -5 -4 24.82 8.45
 6 -5 4 16.7 6.48
 7 -5 4 2.12 3.4
 8 -5 4 -2.23 4.49
 9 -5 4 -3.05 5.11
 10 -5 4 26.7 10.77
 -10 5 -4 9.25 6.5
 -11 5 -4 -4.99 6.2
 11 -5 4 6.11 9.25
 -12 5 -4 -0.15 6.62
 12 -5 4 15.52 8.78
 -13 5 -4 6.36 6.69
 13 5 4 34.51 14.71
 13 -5 4 14.57 10.92
 -14 5 -4 29.47 11.61
 14 5 4 50.2 16.78
 -15 5 -4 26.02 11.41
 15 5 4 11.66 10.76
 16 -6 -4 11.26 8.2
 15 -6 -4 -1.74 6.3
 -14 -6 4 0.38 6.04
 14 -6 -4 -4.76 6.82
 -14 6 4 -15.46 10.49
 -13 6 4 1.65 5.19
 -13 -6 4 19.48 10.7
 13 -6 -4 12.92 9.17
 -12 -6 4 61.42 16.22
 12 -6 -4 50.34 15.11
 -11 -6 4 35.67 11.78
 11 -6 -4 28.45 11.09
 -10 -6 4 121.02 20.3
 10 -6 -4 102 20.02
 -9 6 4 153.48 15.38
 9 -6 -4 157.34 23.05
 -9 -6 4 149.64 22.02
 -8 6 4 83.52 11.58
 -8 -6 4 86.6 16.23
 8 -6 -4 74.79 15.41
 7 -6 -4 56.42 13.1
 -7 -6 4 70.83 14.54
 6 -6 -4 84.55 14.84
 -6 -6 4 91.05 15.73
 -5 -6 4 21.57 7.38
 5 -6 -4 34.87 9.2
 4 -6 -4 82.13 14.05
 3 -6 -4 16.88 6.09
 -3 6 4 20.4 4.23
 -2 6 4 10.12 4.55
 2 -6 -4 10.83 4.19
 -1 6 4 20.83 7.03
 1 -6 -4 18.95 6.92
 -1 6 4 21.11 3.68
 0 6 4 20.6 7.36
 0 -6 -4 13.09 6.65
 -1 -6 -4 20.46 6.83
 -1 6 -4 16.91 2.6
 -2 6 -4 0.59 0.96
 2 -6 4 -0.47 1.32
 -2 -6 -4 2.04 3.39
 3 -6 4 99.35 11.44
 -3 -6 -4 82.24 14.18
 -4 -6 -4 10.74 6.16
 4 -6 4 13.49 5.16
 -5 -6 -4 26.32 8.7
 5 -6 4 22.24 7.24
 6 -6 4 6.01 5.33
 -6 -6 -4 1.9 6.1
 7 -6 4 70.21 14.4
 8 -6 4 113.94 19.76
 9 -6 4 101.35 19.24
 -10 6 -4 8.48 6.76
 10 -6 4 18.12 9
 -11 6 -4 7.42 7.22
 11 -6 4 0.21 3.98
 -12 6 -4 10.2 6.54
 12 -6 4 18.07 10.99
 -13 6 -4 49.92 14.01
 13 6 4 76.49 20.77
 13 -6 4 56.77 17.63
 -14 6 -4 8.39 7.38
 14 6 4 11.43 10.52
 14 -6 4 8.97 6.57
 -15 6 -4 15.14 9.89
 15 -6 4 4.46 7.59
 15 -7 -4 -0.35 6.1
 -14 7 4 -18.26 14.67
 -14 -7 4 24.08 10.91
 14 -7 -4 17.56 11.52
 -13 7 4 21.47 9.26
 -13 -7 4 29.85 12.24
 13 -7 -4 45.41 15.76
 -12 7 4 28.99 13.1
 -12 -7 4 8.52 5.82
 12 -7 -4 34.3 12.88
 -11 -7 4 23.83 10.27
 11 -7 -4 24.36 11.24
 -10 -7 4 34 11.91
 10 -7 -4 20.16 8.98
 -9 -7 4 24.28 9.99
 9 -7 -4 15.58 7.9
 -8 -7 4 -3.08 6.67
 8 -7 -4 0.39 3.63
 7 -7 -4 122.62 19.79
 -7 -7 4 140.92 20.35
 6 -7 -4 17.43 7.65
 -6 -7 4 12.93 5.28
 5 -7 -4 43.19 11.09
 -5 -7 4 35.13 8.99
 4 -7 -4 87.41 15.36
 3 -7 -4 4.45 4.71
 -3 7 4 0.76 1.87
 -2 7 4 10.05 5.57
 2 -7 -4 9.47 5.72
 -1 7 4 34.1 4.29
 1 -7 -4 37.29 10.18
 0 -7 -4 7.31 5.28
 -1 -7 -4 4.83 3.5
 1 -7 4 8.88 2.44
 -2 -7 -4 7.56 5.36
 2 -7 4 4.86 2.11
 -3 -7 -4 14.22 6.41
 3 -7 4 25.07 6.21
 -4 -7 -4 76.48 14.52
 4 -7 4 81.88 11.87
 5 -7 4 213.86 21.07
 -5 -7 -4 226.51 25.46
 -6 -7 -4 21.15 8.44
 6 -7 4 27.31 8.73
 7 -7 4 31.95 10.03
 -7 -7 -4 18.87 7.88
 8 -7 4 15.4 8.17
 -9 7 -4 14.5 8.68
 9 -7 4 6.52 7.12
 -10 7 -4 33.29 10.27
 10 -7 4 42.31 14.43
 -11 7 -4 74.09 17.55
 11 -7 4 84.25 20.37
 -12 7 -4 2.4 4.54
 12 -7 4 -1.23 5.67
 -13 7 -4 3.68 5.31
 13 -7 4 -1.83 5.19
 -14 7 -4 -1.81 5.15
 14 -7 4 3.82 8.45
 15 -7 4 4.51 4.95
 -14 8 4 -0.74 6.25
 -14 -8 4 8.57 6.75
 14 -8 -4 4.64 6.91
 -13 8 4 44.66 14
 -13 -8 4 41.34 13.79
 13 -8 -4 55.98 16.83
 -12 8 4 -12.26 10.99
 -12 -8 4 -3.26 5.44
 12 -8 -4 1.73 4.99
 -11 8 4 23.75 8.92
 -11 -8 4 63.48 16.19
 11 -8 -4 48.11 15.34
 -10 -8 4 54.26 13.93
 10 -8 -4 67.81 17.05
 -9 -8 4 336.3 34.22
 9 -8 -4 307.95 34.32
 -8 -8 4 260.24 29.09
 8 -8 -4 243.14 28.84
 -7 -8 4 169.64 22.7
 7 -8 -4 175.47 23.52
 6 -8 -4 91.55 16.47
 -6 -8 4 121.43 18.69
 5 -8 -4 101 16.99
 4 -8 -4 81.49 14.75
 3 -8 -4 116.91 18.07
 -3 8 4 143.99 13.66
 2 -8 -4 119.26 17.72
 1 -8 -4 24.27 12.14
 0 -8 -4 357.33 30.46
 -1 -8 -4 18.44 7.64
 -2 -8 -4 3.64 3.24
 2 -8 4 10.44 3.43
 3 -8 4 82.25 11.52
 -3 -8 -4 67.08 14.21
 -4 -8 -4 13.08 8.1
 4 -8 4 1.13 2.65
 -5 -8 -4 81.13 16.19
 5 -8 4 74.06 13.04
 -6 -8 -4 25.08 9.42
 6 -8 4 24.79 8.64
 7 -8 4 141.94 20.67
 -7 -8 -4 152.21 23.07
 8 -8 4 191.44 25.25
 -8 -8 -4 249.16 30.51
 -8 8 -4 185.28 25.18
 9 -8 4 316.47 34.29
 -9 8 -4 350.26 35.15
 -10 8 -4 34.67 11.59
 10 -8 4 26.56 11.5
 -11 8 -4 -0.35 5.89
 11 -8 4 4.71 5.84
 -12 8 -4 10.61 7.32
 12 -8 4 0.65 5.92
 -13 8 -4 29.89 11.71
 13 -8 4 33.65 14.44
 14 -8 4 1.61 6.27
 15 -8 4 -1.44 6.14
 14 -9 -4 23.11 12.45
 -13 9 4 11.12 8.36
 13 -9 -4 30.64 13.55
 -13 -9 4 26.12 11.66
 -12 9 4 6.03 6.51
 12 -9 -4 -4.83 7.85
 -12 -9 4 -0.63 6.04
 -11 9 4 90.23 18.68
 11 -9 -4 102.32 22.1
 -11 -9 4 93.26 19.68
 10 -9 -4 17.67 9.74
 -10 -9 4 4.46 7.15
 -9 -9 4 5.91 7.1
 9 -9 -4 2.54 6.94
 8 -9 -4 6.9 7.15
 -8 -9 4 -9.67 8.43
 7 -9 -4 63.25 14.82
 -7 -9 4 59.19 14.04
 6 -9 -4 4.83 4.76
 5 -9 -4 126.74 19.94
 4 -9 -4 155.33 21.62
 3 -9 -4 49.28 12.46
 2 -9 -4 179.37 23.15
 1 -9 -4 8.44 5.92
 0 -9 -4 21.52 8.61
 -1 -9 -4 11.14 5.86
 -2 -9 -4 149.78 20.93
 -3 -9 -4 21.64 7.85
 4 -9 4 146.31 17.6
 -4 -9 -4 194.84 24.62
 5 -9 4 154.8 19.11
 -5 -9 -4 137.81 21.05
 -6 -9 -4 5.86 4.27
 6 -9 4 15.78 7.11
 -7 -9 -4 43.3 12.81
 7 -9 4 23.28 9.19
 -7 9 -4 36.6 10.87
 -8 9 -4 -9.62 7.57
 -8 -9 -4 3.64 5.83
 8 -9 4 9.22 7.06
 -9 9 -4 -3.96 5.88
 -9 -9 -4 -2.74 6.65
 9 -9 4 -0.91 4.32
 -10 9 -4 11.95 8
 10 -9 4 13.24 8.48
 -10 -9 -4 26.22 11.91
 -11 9 -4 59.06 15.78
 11 -9 4 49.08 15.67
 -12 9 -4 9.6 9.51
 12 -9 4 2.24 4.32
 -13 9 -4 51.85 16.23
 13 -9 4 46.74 16.24
 14 -9 4 -5.48 8.55
 13 -10 -4 9.1 9.95
 -12 10 4 -0.22 7.5
 12 -10 -4 18.28 10.31
 -12 -10 4 23.78 10.61
 -11 -10 4 84.43 19.5
 -11 10 4 56.91 15.63
 11 -10 -4 73.59 19.1
 -10 -10 4 -2.27 6.43
 -10 10 4 -11.33 9.13
 10 -10 -4 -4.42 5.14
 -9 -10 4 56.07 14.44
 9 -10 -4 72.36 17.86
 8 -10 -4 98.15 19.99
 -8 -10 4 101.94 19.07
 7 -10 -4 82.49 17.71
 6 -10 -4 53.8 13.92
 5 -10 -4 3.9 4.58
 4 -10 -4 -0.48 3.97
 3 -10 -4 195.81 24.55
 2 -10 -4 399.91 35.38
 1 -10 -4 84.9 17.02
 0 -10 -4 261.19 29.82
 -1 -10 -4 324.14 31.52
 -2 -10 -4 273.73 29.57
 -3 -10 -4 157.64 23
 -4 -10 -4 1.06 5.26
 -5 -10 -4 4.62 6.72
 -6 10 -4 170.84 24.06
 -6 -10 -4 191.89 26.94
 7 -10 4 154.36 22.67
 -7 -10 -4 165.37 26.41
 -7 10 -4 181.94 25.58
 -8 10 -4 52.78 13.97
 -8 -10 -4 43.28 14.37
 8 -10 4 43.42 13.31
 -9 10 -4 143.98 23.96
 -9 -10 -4 150.67 25.91
 9 -10 4 142.35 23.81
 -10 -10 -4 27.89 12.69
 -10 10 -4 40.17 13.52
 10 -10 4 29.27 12.04
 -11 10 -4 8.69 7.76
 -11 -10 -4 13.32 10.26
 11 -10 4 8.34 8.17
 -12 10 -4 31.6 12.53
 12 -10 4 31.14 13.3
 -12 -10 -4 29.84 14.29
 13 -10 4 -1.71 7.2
 14 -10 4 -0.47 4.22
 -12 -11 4 11.07 7.4
 12 -11 -4 -4.38 8.15
 -11 -11 4 18.2 10.31
 -11 11 4 -4.61 10.54
 11 -11 -4 30.31 13.43
 -10 -11 4 3.83 4.63
 10 -11 -4 -2.33 4.83
 9 -11 -4 37.74 13.14
 8 -11 -4 30.56 11.94
 7 -11 -4 60.5 15.09
 6 -11 -4 35.08 12.63
 5 -11 -4 125.99 21.85
 4 -11 -4 211.36 27.08
 3 -11 -4 130.73 21.14
 2 -11 -4 228.14 27.58
 1 -11 -4 -1.52 3.97
 0 -11 -4 0.87 4.69
 -1 -11 -4 7.4 6.46
 -2 -11 -4 171.58 24.26
 -3 -11 -4 57.42 14.61
 -4 -11 -4 67.62 15.71
 -4 11 -4 63.11 14.2
 -5 11 -4 2.13 6.69
 -5 -11 -4 8.62 6.73
 -6 11 -4 -6.46 7.47
 -6 -11 -4 1.3 4.6
 -7 11 -4 56.75 14.68
 -7 -11 -4 32.06 12.25
 -8 11 -4 -5.93 7.22
 -8 -11 -4 9.83 8.19
 -9 11 -4 -1.09 6.2
 -9 -11 -4 0.43 5.01
 -10 11 -4 0.43 5.15
 -10 -11 -4 -1.66 4.74
 -11 11 -4 8.62 7.59
 -11 -11 -4 31.32 13.69
 -11 12 4 55.28 16.09
 11 -12 -4 52.76 17.1
 10 -12 -4 27.07 11.75
 9 -12 -4 174.7 28.93
 8 -12 -4 33.05 11.98
 7 -12 -4 29.57 11.22
 6 -12 -4 80.03 18.01
 5 -12 -4 26.52 10.56
 4 -12 -4 25.16 10.08
 3 -12 -4 24.93 9.68
 2 -12 -4 34.51 11.1
 1 -12 -4 138.54 22.76
 0 -12 -4 445.65 40.38
 -1 -12 -4 106.2 19.72
 -2 -12 -4 48.62 13.25
 -3 12 -4 -1.33 6.03
 -3 -12 -4 -1.4 5.87
 -4 12 -4 46.59 12.91
 -4 -12 -4 47.78 14.16
 -5 12 -4 30.81 11.43
 -5 -12 -4 37.38 12.31
 -6 12 -4 45.04 13.01
 -6 -12 -4 54.97 15.59
 -7 12 -4 22.28 9.73
 -7 -12 -4 27.79 12.03
 -8 12 -4 21.86 8.82
 -8 -12 -4 28.16 12.14
 -9 12 -4 73.42 17.93
 -9 -12 -4 88.14 21.33
 -10 12 -4 7.67 6.4
 -10 -12 -4 8.92 5.05
 -11 12 -4 48.78 15.97
 10 -13 -4 7.77 6.58
 9 -13 -4 22.01 11.19
 8 -13 -4 2.44 4.69
 7 -13 -4 2.49 4.52
 6 -13 -4 12.96 8.38
 5 -13 -4 17.19 8.39
 4 -13 -4 79.92 17.86
 3 -13 -4 126.22 22.18
 2 -13 -4 160.03 24.96
 1 -13 -4 18.86 8.5
 0 -13 -4 5.24 5.19
 0 13 -4 6.81 6.43
 -1 13 -4 49.41 13.14
 -1 -13 -4 75.76 17.66
 -2 -13 -4 217.57 29.38
 -2 13 -4 216.8 26.1
 -3 13 -4 126.67 20.59
 -3 -13 -4 123.23 22.14
 -4 13 -4 55.2 13.68
 -4 -13 -4 37.22 13.44
 -5 13 -4 19.89 9.79
 -5 -13 -4 4.62 6.95
 -6 13 -4 6.78 7.36
 -6 -13 -4 1.72 4.72
 -7 13 -4 7.05 6.04
 -7 -13 -4 -1.12 5.81
 -8 13 -4 2.97 6
 -8 -13 -4 5.26 6.77
 -9 13 -4 28.81 11.83
 -9 -13 -4 9.49 8.86
 -10 13 -4 20.03 11.18
 8 -14 -4 4.81 7.07
 7 -14 -4 9.14 8.07
 6 -14 -4 8.16 7.11
 5 -14 -4 6.15 6.22
 4 -14 -4 18.83 10.44
 3 -14 -4 -5.55 6.55
 2 -14 -4 24 10.14
 1 -14 -4 82.33 18.74
 0 -14 -4 121.43 23.28
 -1 -14 -4 63.71 16.38
 -2 14 -4 51.35 13.03
 -2 -14 -4 34.36 13.16
 -3 14 -4 10.9 6.69
 -3 -14 -4 2.31 4.96
 -4 14 -4 -0.82 5.42
 -4 -14 -4 8.94 9.56
 -5 14 -4 -3.2 5.34
 -5 -14 -4 5.25 8.08
 -6 14 -4 18.51 10.14
 -6 -14 -4 9.41 6.41
 -7 14 -4 5.19 6.16
 -7 -14 -4 9.28 7.72
 -8 14 -4 21.22 12.04
 -8 -14 -4 -6.47 7.31
 -9 14 -4 34.73 12.8
 6 -15 -4 4.1 4.22
 5 -15 -4 1.67 5.01
 4 -15 -4 7.23 6.47
 3 -15 -4 6.97 6.57
 2 -15 -4 65.3 17.25
 1 -15 -4 47.34 14.6
 0 -15 -4 1.84 5.09
 -1 -15 -4 14.57 7.94
 -2 -15 -4 28.1 12.24
 -3 15 -4 22.28 9.83
 -3 -15 -4 16.48 10.19
 -4 15 -4 10.3 6.99
 -4 -15 -4 -1.35 5.65
 -5 15 -4 11.04 7.71
 -5 -15 -4 1.88 5.14
 -6 15 -4 10.39 8.94
 -6 -15 -4 13.58 9.27
 -7 15 -4 -5.04 6.54
 -8 15 -4 17.07 10.44
 3 -16 -4 0.42 4.12
 2 -16 -4 3.77 5.77
 1 -16 -4 8.33 7.34
 0 -16 -4 -0.86 3.74
 -1 -16 -4 0.81 3.6
 -2 -16 -4 2.48 6.09
 -3 -16 -4 5.99 7.14
 -5 16 -4 20.37 10.98
 -6 16 -4 9.59 8.1
 -7 16 -4 8.25 8.48
 -15 0 5 19.43 11.45
 -14 0 5 -7.09 5.89
 -13 0 5 6.74 7.57
 -12 0 5 4.97 7.73
 -11 0 5 15.21 10.36
 -10 0 5 12.21 9.94
 -9 0 5 1.87 5.26
 9 0 -5 -3.41 5.27
 -8 0 5 12.83 8.12
 8 0 -5 0.67 2.66
 -7 0 5 8 6.85
 7 0 -5 0.96 2.74
 -7 0 5 1.66 3.42
 -6 0 5 3.14 3.95
 -6 0 5 5.33 5.36
 6 0 -5 0.1 1.94
 -5 0 5 2.49 3.97
 -5 0 5 5.84 4.66
 5 0 -5 1.9 2.71
 -4 0 5 -2.36 3.43
 -4 0 5 -1.19 3.4
 4 0 -5 -0.36 2.32
 -3 0 5 -4.54 4.05
 3 0 -5 0.27 1.35
 -3 0 5 -5.62 6.01
 2 0 -5 1.84 2.34
 -2 0 5 2.74 5
 1 0 -5 0.34 1.24
 -1 0 5 1.03 4.37
 0 0 5 0.3 3.98
 0 0 -5 0.59 1.42
 1 0 5 -2.4 4.28
 -1 0 -5 0.31 1.94
 -2 0 -5 2.49 2.79
 2 0 5 -2.45 3.5
 -3 0 -5 2.4 2.7
 3 0 5 1.29 3.98
 4 0 5 3.75 5.86
 5 0 5 -3.37 4.2
 5 0 5 2.97 4.11
 6 0 5 5.46 3.95
 6 0 5 -5.65 7.28
 7 0 5 5.85 5.45
 7 0 5 -6.04 6.94
 8 0 5 5.01 5.35
 8 0 5 0.07 4.64
 9 0 5 -2.31 4.54
 9 0 5 4.27 5.03
 10 0 5 -4.92 8.03
 10 0 5 2.73 4.55
 11 0 5 4.15 4.07
 11 0 5 -23.7 11.59
 12 0 5 -12.68 11.24
 13 0 5 0.47 6.57
 -14 0 -5 -6.16 7.13
 14 0 5 -2.74 9.47
 -15 0 -5 -9.19 8.09
 -14 -1 5 30.71 13.75
 -13 -1 5 8.37 7.17
 -12 -1 5 14.58 9.49
 -11 1 5 26.23 11.7
 -11 -1 5 21.53 11.23
 11 -1 -5 1.42 3.58
 -10 1 5 53.23 13.81
 -10 -1 5 39.55 12.39
 10 -1 -5 33.36 10.56
 -9 1 5 45.99 12.55
 -9 -1 5 27.79 10.46
 9 -1 -5 25.82 9.44
 -8 1 5 69.56 12.26
 -8 1 5 78.69 14.79
 -8 -1 5 68.14 14.79
 8 -1 -5 53.79 11.4
 -7 1 5 -2.61 4.38
 -7 -1 5 11.08 7.17
 7 1 -5 4.33 3.61
 7 -1 -5 5.13 4.75
 -7 1 5 3.92 3.47
 -6 -1 5 3.66 4.64
 -6 1 5 0.71 3.71
 -6 1 5 9.04 6.51
 -6 -1 5 4.2 5.37
 6 1 -5 1.91 2.81
 6 -1 -5 1.45 3.2
 -5 1 5 -2.53 3.59
 -5 -1 5 1.15 3.72
 -5 -1 5 0.36 5.35
 5 1 -5 0.36 1.54
 -5 1 5 4.09 4.45
 5 -1 -5 -0.49 2.28
 4 -1 -5 67.49 9.66
 4 1 -5 77.09 8.9
 -4 1 5 56.55 10.93
 -4 1 5 73.3 11.63
 -4 -1 5 76.31 12.93
 -4 -1 5 80.7 13.16
 3 -1 -5 44.4 7.67
 -3 -1 5 45.09 9.53
 -3 1 5 37.02 8.76
 -3 -1 5 40.86 9.37
 -3 1 5 34.13 7.61
 3 1 -5 30.58 5.27
 -2 -1 5 44.16 10.1
 -2 1 5 49.85 9.05
 -2 1 5 58.03 11.41
 2 1 -5 56.03 6.43
 2 -1 -5 65.67 8.99
 1 1 -5 5.01 3.12
 1 -1 -5 13.13 4.63
 -1 -1 5 3.06 4.65
 -1 1 5 4.59 5.24
 0 1 -5 15.9 4.04
 0 -1 -5 21.62 5.73
 0 -1 5 13.9 5.89
 0 1 5 25.54 7.91
 -1 -1 -5 51.69 8.72
 1 -1 5 58.21 10.84
 -1 1 -5 54.13 7.46
 1 1 5 61.61 12.1
 2 -1 5 15.74 8.84
 -2 -1 -5 10.55 4.27
 -2 1 -5 11.94 3.71
 2 1 5 14.26 8.05
 3 -1 5 35.56 9.12
 -3 -1 -5 38.97 7.94
 3 1 5 55.35 11.42
 3 1 5 43.22 11.2
 4 -1 5 2.6 5.5
 4 1 5 9.39 7.38
 4 1 5 -0.9 3.8
 5 -1 5 37.77 9.75
 5 1 5 39.1 10.18
 5 1 5 33.53 10
 6 -1 5 62.18 11.83
 6 1 5 59.23 11.74
 6 1 5 78.41 16.63
 7 -1 5 82.84 13.48
 7 1 5 72.82 13.01
 7 1 5 76.94 17.5
 8 -1 5 3.11 3.38
 8 1 5 8.67 6.2
 8 -1 5 3.7 6.19
 8 1 5 15.32 9.4
 9 -1 5 9.75 5.86
 9 1 5 5.24 5.56
 9 -1 5 9.4 8.23
 9 1 5 8.91 7.88
 10 -1 5 5.72 4.43
 10 1 5 2.13 4.19
 10 -1 5 -1.23 7.11
 10 1 5 1.25 5.39
 11 1 5 9.44 5.43
 11 -1 5 0.27 7.82
 11 1 5 11.15 9.12
 12 -1 5 39.66 15.06
 12 1 5 24.25 11.38
 13 -1 5 50.49 16.39
 13 1 5 34.93 15.3
 -13 1 -5 61.99 16.21
 -14 -1 -5 14.71 6.54
 -14 1 -5 20.18 10.11
 14 -1 5 25.34 12.21
 14 1 5 14.12 7.66
 -15 -1 -5 -2.52 5.39
 -15 1 -5 -2.32 6.37
 -14 -2 5 -6.56 6.05
 -13 -2 5 103.34 21.8
 13 -2 -5 93.22 21.4
 -12 -2 5 176.23 26.7
 12 -2 -5 75.41 18.21
 -11 -2 5 99.95 19.19
 11 -2 -5 77.2 17.49
 -10 -2 5 9.65 7.65
 10 -2 -5 0.34 4.28
 -9 2 5 -2.81 3.16
 -9 -2 5 4.04 5.66
 9 -2 -5 -1.56 2.76
 -8 2 5 59.62 12.94
 -8 -2 5 43.22 11.79
 -8 2 5 40.06 9.44
 8 -2 -5 45.67 11.38
 -7 2 5 4.88 3.85
 -7 2 5 7.64 6.24
 -7 -2 5 20.11 8.26
 7 -2 -5 -0.28 2.9
 -6 2 5 8.99 6.41
 -6 2 5 -0.24 3.16
 -6 -2 5 0.86 5.85
 6 -2 -5 -3.09 3.07
 -5 2 5 2.75 5.02
 -5 2 5 21.1 7.72
 -5 -2 5 1.57 3.68
 5 -2 -5 12.28 5.76
 -4 -2 5 88.88 13.99
 -4 -2 5 85.52 13.53
 -4 2 5 70.65 11.95
 4 -2 -5 76.98 11.13
 -4 2 5 94.21 13.24
 3 -2 -5 63.01 10
 -3 -2 5 55.63 10.98
 -3 -2 5 61.56 11.54
 -3 2 5 67.08 10.52
 -3 2 5 64.01 11.71
 -2 2 5 171.64 19.47
 -2 2 5 155.03 15.04
 2 2 -5 138.17 7.32
 2 -2 -5 154.04 15.26
 -2 -2 5 155.43 17.63
 -1 2 5 179.03 19.83
 1 2 -5 149.34 7.81
 -1 -2 5 159.72 18.18
 1 -2 -5 183.99 17.38
 0 -2 5 104.69 15.01
 0 2 5 95.19 14.58
 0 2 -5 91.72 7.44
 0 -2 -5 89.78 11.79
 1 -2 5 139.23 16.98
 -1 2 -5 138.23 10.38
 -1 -2 -5 126.19 14.24
 -2 -2 -5 -0.34 1.9
 -2 2 -5 0.61 1.66
 2 2 5 -5.03 7.15
 2 -2 5 -1.86 4.31
 -3 -2 -5 2.21 2.07
 3 -2 5 -4.47 5.26
 3 2 5 -1.26 3.9
 -4 -2 -5 71.36 11.94
 4 -2 5 78.54 13.08
 4 2 5 87.08 16.59
 5 -2 5 223.65 21.6
 5 2 5 249.69 28.83
 6 -2 5 -0.81 3.2
 6 2 5 5.09 5.2
 7 -2 5 48.36 10.07
 7 2 5 52.7 14.94
 8 -2 5 11.59 5.56
 8 2 5 9.16 7.08
 9 -2 5 15.64 7.35
 9 2 5 3.08 6.59
 10 -2 5 13.56 6.2
 10 2 5 0.56 5.4
 11 2 5 -3.47 8.07
 12 2 5 34.66 14.05
 -13 2 -5 -9.03 8.45
 13 2 5 4.32 9.64
 -14 -2 -5 -3.35 6.37
 -14 2 -5 -1.21 6.16
 14 2 5 3.45 6.07
 -15 2 -5 -1.84 7.6
 -14 -3 5 58.14 18.12
 14 -3 -5 40.91 14.89
 -13 -3 5 35.25 13.59
 13 -3 -5 22.64 10.75
 -12 -3 5 28.94 11.4
 12 -3 -5 34.75 12.99
 -11 -3 5 91.33 18.83
 11 -3 -5 79.36 17.54
 -10 3 5 75.36 12.21
 -10 -3 5 90.88 17.55
 10 -3 -5 80.16 16.58
 -9 -3 5 68.79 15.33
 -9 3 5 61.6 11.03
 9 -3 -5 82.08 16.04
 -8 3 5 30.53 8.16
 -8 -3 5 32.78 10.53
 8 -3 -5 26.15 9.05
 -7 3 5 13.86 7.76
 -7 3 5 0.09 2.8
 -7 -3 5 13.87 7.2
 7 -3 -5 0.26 2.98
 -6 3 5 134.73 16.84
 -6 3 5 124.38 15.73
 6 -3 -5 120.09 16.05
 -6 -3 5 119.71 17.91
 5 -3 -5 4.82 3.55
 -5 3 5 3.56 4.81
 -5 3 5 12.67 6.68
 -5 -3 5 -6.58 6.3
 4 -3 -5 45.23 8.98
 -4 -3 5 58.54 11.96
 -4 3 5 54.05 10.13
 -4 3 5 57.11 12.03
 -3 3 5 233.3 21.99
 -3 3 5 241.81 19.02
 3 -3 -5 244.52 20.72
 2 -3 -5 -1.16 2.78
 -2 3 5 6.74 6.23
 -2 -3 5 -0.91 3.7
 -2 3 5 2.61 3.26
 1 -3 -5 0.31 2.18
 -1 -3 5 13.39 6.4
 0 -3 -5 161.66 17.15
 0 -3 5 133.69 17.59
 1 -3 5 213.07 21.15
 -1 3 -5 209.17 10.69
 -1 -3 -5 214.22 19.8
 1 3 5 187.41 20.9
 2 -3 5 361.05 27.63
 -2 -3 -5 332.78 25
 -2 3 -5 325.61 16.15
 2 3 5 319.28 28.85
 3 -3 5 498.89 32.44
 -3 -3 -5 474.83 30.98
 3 3 5 492.48 37.18
 4 -3 5 51 11.04
 -4 -3 -5 54.79 11.15
 4 3 5 37.9 10.4
 5 -3 5 -2.4 4.43
 -5 -3 -5 4.48 5.09
 5 3 5 12.81 8.01
 6 -3 5 14.31 5.65
 6 3 5 14.53 8.19
 7 -3 5 150.56 17.89
 7 3 5 127 22.37
 8 3 5 15.95 8.64
 8 -3 5 16.12 5.81
 9 3 5 12.83 9.33
 9 -3 5 27.56 8.36
 10 3 5 15.9 9.93
 10 -3 5 11.76 4.67
 11 3 5 7.02 7.25
 12 3 5 8.8 10.31
 -13 3 -5 -10.81 9.3
 13 3 5 6.61 7.5
 -14 3 -5 44.07 14.04
 14 3 5 54.86 17.82
 15 -4 -5 7.15 9.14
 -14 -4 5 5.44 8.53
 14 -4 -5 -1.94 6.34
 -13 -4 5 164.92 26.67
 13 -4 -5 119.17 24.45
 -12 -4 5 35.83 12.88
 12 -4 -5 49.54 15.5
 -11 -4 5 82.75 17.54
 11 -4 -5 112.02 21.24
 -10 -4 5 145.75 22.21
 10 -4 -5 126.84 21.17
 -9 4 5 -2.45 4.2
 -9 -4 5 0.44 5.49
 9 -4 -5 -0.06 4.03
 -8 4 5 24.78 7.54
 -8 -4 5 22.18 9.3
 8 -4 -5 25.07 8.7
 -7 4 5 67.15 11.66
 -7 -4 5 53.52 12.4
 7 -4 -5 89.87 15.08
 6 -4 -5 0.38 2.45
 -6 4 5 5.52 5.64
 -6 4 5 18.56 8.56
 -6 -4 5 13.59 8.79
 5 -4 -5 45.35 10.24
 -5 4 5 54.3 10.42
 -5 4 5 32.47 9.03
 -5 -4 5 27.3 8.41
 -4 -4 5 118.24 16.74
 -4 4 5 160.46 16.06
 -4 4 5 148.68 17.95
 4 -4 -5 134.51 16.75
 3 -4 -5 19.75 6.65
 -3 4 5 25.63 6.74
 -2 4 5 263.54 17.83
 2 -4 -5 252.36 22.26
 1 -4 -5 435.3 29.28
 0 -4 -5 261.64 22.92
 0 4 5 300.43 25.28
 -1 -4 -5 262.64 22.98
 1 -4 5 300.84 25.73
 1 4 5 281.68 25.86
 2 -4 5 99.47 14.81
 -2 -4 -5 94.1 14.37
 -2 4 -5 85.62 7.53
 2 4 5 78.23 14.15
 3 -4 5 65.42 12.64
 -3 -4 -5 52.04 11.22
 3 4 5 52.07 12.2
 4 4 5 76.97 16.39
 -4 -4 -5 64.68 12.47
 4 -4 5 73.44 12.54
 5 -4 5 345.47 27.42
 -5 -4 -5 383.65 31.37
 5 4 5 357.6 34.6
 6 4 5 40.9 12.75
 6 -4 5 48.39 10.1
 7 4 5 43 13.82
 7 -4 5 58.11 11.31
 8 4 5 -1.66 6.65
 8 -4 5 0.39 3.11
 9 4 5 1.43 4.28
 9 -4 5 6.96 5.16
 10 4 5 23.1 10.39
 10 -4 5 18.3 5.86
 11 4 5 11.93 9.99
 12 4 5 -2.97 5.35
 -12 4 -5 -14.26 8.3
 13 4 5 11.29 8.47
 -13 4 -5 16.19 8.78
 14 4 5 130.98 27.91
 -14 4 -5 105.64 21.71
 15 -5 -5 103.68 25.34
 14 -5 -5 137.53 36.13
 -13 -5 5 42.22 14.98
 13 -5 -5 49.99 16.38
 -12 -5 5 76.96 18.42
 12 -5 -5 78.87 18.82
 -11 -5 5 40.84 13.7
 11 -5 -5 34.44 12.11
 -10 -5 5 19.09 9.36
 10 -5 -5 32.79 11.4
 -9 -5 5 243.25 28.85
 -9 5 5 235.35 21.23
 9 -5 -5 224.5 27.93
 -8 -5 5 236.09 27.04
 -8 5 5 256.6 22.4
 8 -5 -5 253 27.61
 -7 -5 5 91.27 16.51
 -7 5 5 80.5 12.88
 7 -5 -5 75.95 14.45
 -6 -5 5 173.28 21.93
 -6 5 5 147.51 17.72
 6 -5 -5 158.73 20.49
 5 -5 -5 3.46 3.92
 -5 -5 5 6.07 3.9
 -5 5 5 23.43 7.55
 -5 5 5 19.31 7.63
 4 -5 -5 66.88 12.57
 -4 5 5 61.51 9.77
 -3 5 5 160.51 14.36
 3 -5 -5 119.55 16.43
 2 -5 -5 1.5 2.48
 -2 5 5 13.54 4.15
 1 -5 -5 5.67 4.48
 -1 5 5 1.55 3.29
 0 -5 -5 95.07 14.88
 0 5 5 126 16.42
 -1 -5 -5 451.41 31.5
 1 5 5 487.07 34.35
 -2 -5 -5 411.11 31.04
 2 5 5 414.32 33.66
 -3 -5 -5 661.46 39.75
 3 5 5 703.14 45.4
 4 5 5 52.27 13.69
 -4 -5 -5 45.63 11.34
 5 5 5 27.34 10.05
 -5 -5 -5 36.05 10.17
 6 5 5 3.91 6.21
 -6 -5 -5 1.91 4.54
 7 5 5 77.6 18.34
 8 5 5 11.23 8.68
 9 5 5 48.65 16.16
 10 5 5 24.58 12.22
 11 5 5 20.78 10.87
 -12 5 -5 49.41 14.75
 12 5 5 64.74 19.39
 13 5 5 5.73 10.43
 -13 5 -5 -11.06 9.59
 -14 5 -5 -0.33 7.1
 15 -6 -5 -11.04 10.12
 14 -6 -5 -0.28 6.92
 -13 -6 5 52.46 15.83
 13 -6 -5 53.72 16.7
 -12 -6 5 44.33 14.45
 12 -6 -5 28.12 11.97
 -11 -6 5 170.48 26.05
 11 -6 -5 152.37 25.76
 -10 -6 5 65.38 16.44
 10 -6 -5 76.27 17.42
 -9 6 5 10.04 4.98
 -9 -6 5 12 7.95
 9 -6 -5 15.99 9.18
 -8 6 5 162.36 18.34
 8 -6 -5 174.15 24.15
 -8 -6 5 158.53 23.05
 7 -6 -5 32.69 10.32
 -7 -6 5 16.12 7.06
 -7 6 5 27.51 7.84
 6 -6 -5 62.49 13.28
 -6 -6 5 64.01 13.91
 5 -6 -5 -4.02 4.78
 -4 6 5 301.48 20.55
 4 -6 -5 273.12 26.46
 3 -6 -5 72.3 13.62
 -3 6 5 75.44 9.82
 2 -6 -5 221.13 23.31
 -2 6 5 246.67 20.18
 1 -6 -5 227.79 23.49
 -1 6 5 220.89 20.42
 0 -6 -5 133.4 17.78
 0 6 5 148.94 18.07
 1 6 5 6.79 6.49
 -1 -6 -5 5.58 4.71
 -2 -6 -5 353.02 29.55
 2 6 5 372 32.36
 3 6 5 49.89 13.23
 -3 -6 -5 57.37 12.47
 4 6 5 33.83 11.3
 -4 -6 -5 30.3 9.59
 5 6 5 142.63 22.93
 -5 -6 -5 143.73 20.36
 6 6 5 37.59 13.33
 -6 -6 -5 13.59 8.57
 7 6 5 62.56 16.41
 -7 -6 -5 78.37 16.39
 8 6 5 89.61 20.52
 9 6 5 83.66 19.59
 10 6 5 61.4 19.1
 11 6 5 14.46 10.49
 -11 6 -5 -5.73 7.44
 -12 6 -5 0.45 5.24
 12 6 5 8.78 9.94
 -13 6 -5 11.8 7.78
 13 6 5 22.65 12.3
 14 -7 -5 10.42 9.49
 -13 -7 5 22.67 10.41
 13 -7 -5 19.61 11.23
 -12 -7 5 43.65 13.89
 12 -7 -5 28.87 11.9
 -11 -7 5 -0.4 5.45
 11 -7 -5 0.66 5.33
 10 -7 -5 0.32 4.31
 -10 -7 5 5.88 6.12
 9 -7 -5 107.83 19.77
 -9 -7 5 102.33 19.66
 -8 7 5 243 22.48
 -8 -7 5 265.52 31.26
 8 -7 -5 261.15 30.06
 7 -7 -5 67.28 14.81
 -7 -7 5 76.59 16.27
 -7 7 5 93.02 14.34
 6 -7 -5 110.71 18.35
 5 -7 -5 22.92 9.1
 4 -7 -5 31.46 9.36
 3 -7 -5 5.61 5.04
 2 -7 -5 40.68 10.35
 -2 7 5 36.74 8.15
 1 -7 -5 0.8 3.71
 -1 7 5 1.81 3.26
 0 7 5 88.62 14.38
 0 -7 -5 99.41 16.17
 -1 -7 -5 128.6 18.69
 1 7 5 121.66 18.1
 2 7 5 31.45 10.2
 -2 -7 -5 19.27 8.47
 -3 -7 -5 162.93 21.55
 3 7 5 187.9 24.75
 -4 -7 -5 139.14 20.27
 4 7 5 152.58 23.81
 5 7 5 114.03 20.86
 -5 -7 -5 92.44 17.57
 6 7 5 7.06 9.43
 -6 -7 -5 0.93 4.51
 7 7 5 52.6 17.09
 -7 -7 -5 60.04 14.72
 8 7 5 21.09 11.9
 -8 -7 -5 0.35 4.93
 9 7 5 110.39 23.12
 -9 -7 -5 102.83 20.58
 10 7 5 85.97 22.32
 -10 7 -5 91.38 19.2
 -11 7 -5 15.01 8.25
 11 7 5 25.45 13.01
 -12 7 -5 22.68 9.98
 12 7 5 36.14 15.67
 14 -8 -5 1.46 7.48
 13 -8 -5 10.77 8.72
 12 -8 -5 1.53 6.75
 -12 -8 5 3.92 7.7
 11 -8 -5 22.64 11.22
 -11 -8 5 30.13 11.86
 10 -8 -5 29.07 11.52
 -10 -8 5 54.65 15.72
 -9 -8 5 10.37 7.32
 9 -8 -5 13.91 8.04
 -8 -8 5 94.69 19.31
 -8 8 5 84.55 13.95
 8 -8 -5 81.22 17.14
 7 -8 -5 3.04 4.77
 6 -8 -5 42.56 11.74
 5 -8 -5 122.85 19.84
 4 -8 -5 213.11 25.09
 3 -8 -5 74.17 15.06
 2 -8 -5 163.31 21.65
 -1 8 5 31.32 8.21
 1 -8 -5 41.61 11.04
 0 8 5 12.47 7.12
 0 -8 -5 0.39 3.88
 -1 -8 -5 174.04 22.42
 1 8 5 238.37 25.68
 2 8 5 86.07 16.12
 -2 -8 -5 54.62 12.89
 -3 -8 -5 8.42 6.16
 -4 -8 -5 0.98 3.11
 -5 -8 -5 -1.33 3.86
 -6 -8 -5 7.21 6.19
 -7 -8 -5 209.29 28.09
 -8 -8 -5 70.11 17.6
 -9 -8 -5 5.41 7.48
 -10 8 -5 19.53 9.73
 -10 -8 -5 12.89 9.32
 -11 8 -5 -0.23 5.8
 11 8 5 26.98 14.78
 -12 8 -5 18.86 11.61
 12 8 5 34.03 16.02
 13 -9 -5 2.87 6.16
 12 -9 -5 2.04 5.69
 -11 -9 5 4.97 6.49
 11 -9 -5 -1.63 5.17
 -10 -9 5 23.4 10.76
 10 -9 -5 13.22 9.54
 -9 -9 5 -4.96 8.17
 9 -9 -5 -4.03 5.45
 8 -9 -5 3.78 5.05
 7 -9 -5 61.2 15.2
 6 -9 -5 125.81 20.72
 5 -9 -5 32.68 10.35
 4 -9 -5 13.38 6.58
 3 -9 -5 19.45 9.02
 2 -9 -5 58.28 13.64
 1 -9 -5 67.92 14.69
 0 9 5 25.66 9.96
 0 -9 -5 23.13 8.78
 -1 -9 -5 35.39 10.95
 -2 -9 -5 3.46 4.72
 -3 -9 -5 18.9 8.6
 -4 -9 -5 20.93 8.97
 -5 -9 -5 13.78 8.04
 -6 -9 -5 3.54 5.38
 -7 -9 -5 -0.94 4.44
 -8 -9 -5 -2.75 4.89
 -9 9 -5 77.31 18.17
 -9 -9 -5 68.35 17.55
 -10 9 -5 74.94 18.31
 -10 -9 -5 88.91 20.95
 -11 9 -5 23.5 9.85
 -11 -9 -5 43.02 16.13
 -12 -9 -5 4.2 7.08
 12 -10 -5 1.3 5.48
 -11 -10 5 -6.04 7.3
 11 -10 -5 -0.03 6.57
 -10 -10 5 4.79 6.7
 10 -10 -5 4.2 5.27
 9 -10 -5 25.96 11.13
 8 -10 -5 31.77 12.15
 7 -10 -5 39.88 12.7
 6 -10 -5 -4.23 5.89
 5 -10 -5 35.49 12.2
 4 -10 -5 23.46 8.79
 3 -10 -5 8.22 4.92
 2 -10 -5 -0.21 4.58
 1 -10 -5 12.76 8.15
 0 -10 -5 51.39 13.49
 -1 -10 -5 31.87 9.92
 -2 -10 -5 2.01 5.78
 -3 -10 -5 28.76 10.65
 -4 -10 -5 44.84 14.3
 -5 -10 -5 5.46 6.08
 -6 -10 -5 -4.22 5.92
 -7 -10 -5 57.68 16.21
 -8 10 -5 43.87 14.07
 -8 -10 -5 44.27 14.44
 -9 10 -5 1.7 7.07
 -9 -10 -5 11.29 8.64
 -10 10 -5 2.3 5.43
 -10 -10 -5 4.64 5.87
 -11 10 -5 3.09 4.79
 -11 -10 -5 15.28 10.91
 11 -11 -5 -1.37 5.78
 10 -11 -5 28.63 11.76
 9 -11 -5 5.76 6.46
 8 -11 -5 2.02 4.1
 7 -11 -5 15.34 8.57
 6 -11 -5 15.03 10.15
 5 -11 -5 -3.76 5.29
 4 -11 -5 4.45 4.9
 3 -11 -5 12.78 8.35
 2 -11 -5 13.15 8.11
 1 -11 -5 16.29 7.6
 0 -11 -5 10.95 8.75
 -1 -11 -5 29.26 10.8
 -2 -11 -5 17.96 9.68
 -3 -11 -5 4.07 5.95
 -4 -11 -5 2.95 4.89
 -5 -11 -5 -5.78 8.33
 -6 -11 -5 4.99 5.64
 -7 11 -5 13.99 7.51
 -7 -11 -5 19.52 10.89
 -8 11 -5 -7.87 9.08
 -8 -11 -5 8.41 8.64
 -9 11 -5 3.88 6.66
 -9 -11 -5 3.44 6.82
 -10 11 -5 -9.37 10.35
 -10 -11 -5 -1.51 5.33
 10 -12 -5 3.83 7.34
 9 -12 -5 7.28 7.67
 8 -12 -5 10.58 12.5
 7 -12 -5 11.64 8.89
 6 -12 -5 94.24 19.69
 5 -12 -5 2.12 7.24
 4 -12 -5 14.52 8.5
 3 -12 -5 35.74 12.87
 2 -12 -5 45.23 14.15
 1 -12 -5 29.94 10.74
 0 -12 -5 0.12 3.91
 -1 -12 -5 15.9 9.47
 -2 -12 -5 0.62 5.26
 -3 -12 -5 -2.76 5.18
 -4 -12 -5 3.28 5.5
 -5 -12 -5 63.64 17.1
 -5 12 -5 108.46 21.06
 -6 12 -5 12.05 7.54
 -6 -12 -5 27.76 11.44
 -7 12 -5 11.38 7.65
 -7 -12 -5 7.12 7.26
 -8 12 -5 -6.44 8.12
 -8 -12 -5 -0.53 5.19
 -9 12 -5 -7.25 9.52
 -9 -12 -5 13.77 10.39
 8 -13 -5 36.4 14.07
 7 -13 -5 21.11 9.92
 6 -13 -5 63.8 16.93
 5 -13 -5 17.91 9.61
 4 -13 -5 11.33 7.12
 3 -13 -5 -2.18 3.7
 2 -13 -5 22.3 10.3
 1 -13 -5 -2.83 5.97
 0 -13 -5 7.23 8.06
 -1 -13 -5 39.04 13.65
 -2 -13 -5 18.13 8.84
 -3 -13 -5 35.1 12.7
 -3 13 -5 137.29 23.51
 -4 13 -5 -4.5 8.4
 -4 -13 -5 -4.3 6.28
 -5 13 -5 -7.57 8.59
 -5 -13 -5 2.53 5.94
 -6 13 -5 1.02 6.23
 -6 -13 -5 -2.86 5.76
 -7 13 -5 4.8 5.45
 -7 -13 -5 7.89 8.12
 -8 13 -5 4.47 6.72
 6 -14 -5 21.84 11.27
 5 -14 -5 11.03 7.36
 4 -14 -5 69.9 17.72
 3 -14 -5 59.71 16.88
 2 -14 -5 55.54 15.88
 1 -14 -5 8.24 8.43
 0 -14 -5 1.55 6.15
 -1 -14 -5 5.46 5.96
 -2 14 -5 -3.61 7.75
 -2 -14 -5 2.14 4.97
 -3 14 -5 -3.21 7.64
 -3 -14 -5 10.28 7.62
 -4 14 -5 5.5 5.76
 -4 -14 -5 6.68 6.7
 -5 14 -5 52.67 15.72
 -5 -14 -5 44.04 15.07
 -6 14 -5 3.72 7.46
 -7 14 -5 41.69 14.78
 3 -15 -5 8.86 8.07
 2 -15 -5 4.37 6.95
 1 -15 -5 2.66 4.45
 0 -15 -5 49.08 16.5
 -1 -15 -5 36.42 13.75
 -2 -15 -5 6.51 5.79
 -4 15 -5 48.33 14.42
 -5 15 -5 112.86 22.98
 -6 15 -5 31.96 12.5
 -13 0 6 8.23 7.48
 -12 0 6 131.11 23.48
 -11 0 6 31.61 12.22
 -10 0 6 17.2 9.8
 -9 0 6 126.57 20.43
 -8 0 6 56.55 13.35
 -7 0 6 2.76 3.91
 -7 0 6 0.21 3.83
 -6 0 6 162.48 20.71
 -6 0 6 184.69 21.59
 -5 0 6 282.68 26.38
 -5 0 6 267.95 25.67
 -4 0 6 313.01 27.02
 -4 0 6 290.48 26.79
 -3 0 6 760.68 43.19
 -2 0 6 33 9.88
 -1 0 6 26.73 8.66
 0 0 6 54.19 11.7
 1 0 6 47.59 11.28
 2 0 6 18.19 8.04
 -2 0 -6 7.83 4.11
 3 0 6 49.5 11.24
 -3 0 -6 54.74 9.66
 4 0 6 131.01 18.86
 -4 0 -6 115.68 14.82
 5 0 6 94.59 15.78
 -5 0 -6 112.95 15.72
 6 0 6 64.4 13.09
 7 0 6 6.39 6.22
 8 0 6 98.99 15.77
 9 0 6 39.88 10.79
 10 0 6 48.1 11.7
 10 0 6 46.09 16.72
 11 0 6 16.15 7.72
 11 0 6 -4.39 6.23
 12 0 6 17.83 9.71
 -14 0 -6 8.63 7.06
 -13 1 6 21.04 10.39
 -13 -1 6 16.87 9.74
 -12 1 6 15.97 9.65
 -12 -1 6 11.37 9.37
 -11 1 6 0.6 5.21
 -11 -1 6 7.05 7.57
 -10 1 6 28.51 11.13
 -10 -1 6 18.51 8.29
 -9 1 6 18.5 8.97
 -9 -1 6 13.79 6.52
 -8 1 6 165.91 22.25
 -8 1 6 115.66 17.26
 -8 -1 6 148.35 21.52
 -7 1 6 132.64 18.19
 -7 1 6 125.48 18.46
 -7 -1 6 144.92 20.42
 -6 -1 6 47.81 11.71
 -6 1 6 20.87 6.99
 -6 1 6 29.54 8.85
 -6 -1 6 32.9 9.68
 -5 -1 6 27.26 8.49
 -5 1 6 28.54 8.46
 -5 1 6 37.57 9.31
 -5 -1 6 28.22 8.77
 -4 1 6 107.86 15.45
 -4 -1 6 109.53 16.76
 -4 -1 6 107.47 16.14
 -4 1 6 117.94 17.02
 -3 1 6 110.08 16.33
 -3 -1 6 105.44 16.37
 -2 1 6 225.66 23.86
 -2 -1 6 209.48 22.69
 -1 1 6 355.1 29.27
 -1 -1 6 327.01 28.61
 1 -1 -6 378.25 23.88
 0 1 6 71.62 13.41
 0 -1 -6 69.49 10.34
 0 -1 6 70.38 13.55
 1 1 6 100.47 16.12
 -1 -1 -6 94.62 12.49
 1 -1 6 87.94 14.92
 -2 -1 -6 9.87 4.05
 2 -1 6 6.1 5.69
 2 1 6 16.83 8.26
 -3 -1 -6 26.16 7.3
 3 -1 6 27.19 8.39
 3 1 6 27.73 9.58
 4 -1 6 29.83 9.29
 -4 -1 -6 25.5 7.55
 -4 1 -6 29.47 7.32
 4 1 6 36.89 10.54
 5 -1 6 10.46 6.15
 -5 -1 -6 20.64 7.23
 5 1 6 28.19 9.87
 6 -1 6 -7.35 6.3
 6 1 6 3.86 4.65
 6 1 6 5.34 5.34
 7 -1 6 44.48 10.65
 7 1 6 43.89 11.17
 7 1 6 20.11 8.2
 8 1 6 151.12 20.05
 8 -1 6 182.72 21.67
 8 1 6 188.81 29.35
 9 -1 6 75.58 14.19
 9 1 6 57.33 17.28
 9 1 6 80.82 15.26
 10 -1 6 101.87 16.22
 10 1 6 126.14 25.51
 10 1 6 115.34 17.72
 11 1 6 -3.04 9.69
 11 1 6 3.45 5.61
 12 1 6 1.62 9.22
 -14 2 6 59.65 17.64
 -13 2 6 22.84 10.78
 -13 -2 6 1.29 5.55
 -12 2 6 48.45 14.92
 -12 -2 6 74.84 18.89
 -11 2 6 15.83 8.85
 -11 -2 6 22.76 11.33
 -10 2 6 54.29 14.07
 -10 -2 6 43.93 13.96
 -9 2 6 10.4 6.56
 -9 2 6 25.41 10.65
 -9 -2 6 9.31 7.64
 -8 2 6 62.84 12.64
 -8 2 6 79.73 15.39
 -8 -2 6 57.96 14.12
 -7 2 6 8.22 4.18
 -7 2 6 10.14 6.44
 -7 -2 6 23.78 9.37
 -6 2 6 110.27 17.12
 -6 2 6 117.31 17.35
 -6 -2 6 140.95 20.65
 -5 -2 6 79.32 14.81
 -5 2 6 105.23 16.12
 -5 2 6 88.67 14.5
 -4 -2 6 107.39 17.22
 -4 2 6 75.36 13.93
 4 -2 -6 104.03 13.67
 -4 2 6 88.49 13.74
 -3 2 6 309.89 27.44
 -3 2 6 323.79 24.78
 3 -2 -6 290.17 22.48
 -3 -2 6 296.6 27.61
 -2 2 6 41.5 10.32
 -2 -2 6 28.58 8.95
 2 -2 -6 37.73 7.91
 1 -2 -6 60.07 10.16
 -1 -2 6 59.28 12.6
 -1 2 6 59.41 12.59
 0 -2 -6 3.25 2.76
 0 -2 6 17.83 7.77
 0 2 6 26.18 9.4
 1 -2 6 28.1 11.23
 -1 -2 -6 32.41 8.31
 1 2 6 33.38 10.54
 2 -2 6 8.48 5.71
 -2 -2 -6 10.44 5.08
 2 2 6 11.35 7.65
 3 -2 6 103.03 16.13
 3 2 6 138.3 19.28
 -3 -2 -6 103.52 14.99
 -4 -2 -6 9.92 4.95
 4 2 6 15.21 8.86
 4 2 6 -1.75 5.89
 4 -2 6 -0.01 4.47
 5 2 6 10.72 8.4
 -5 -2 -6 14.28 6.43
 5 2 6 6.88 5.48
 5 -2 6 24.83 10.46
 6 2 6 104.43 16.99
 -6 -2 -6 112.84 17.25
 6 2 6 96.24 19.7
 6 -2 6 97.56 15.73
 7 2 6 25.09 9.61
 7 2 6 11.46 6.68
 7 -2 6 18.32 7.87
 8 2 6 34.84 10.72
 8 2 6 24.09 9.91
 8 -2 6 31.99 9.87
 9 -2 6 -0.44 4.27
 9 2 6 4 4.74
 9 2 6 -3.3 8.01
 10 -2 6 11.5 6.18
 10 2 6 13.21 7.12
 10 2 6 11.3 9.56
 11 2 6 31.24 10.14
 11 2 6 20.76 11.82
 12 2 6 91.86 23.46
 -14 3 6 12.84 10.85
 -13 3 6 2.77 8.45
 -13 -3 6 23.18 11.18
 -12 3 6 15.3 11.03
 -12 -3 6 16.97 11.07
 -11 3 6 11.77 8.62
 -11 -3 6 24.69 11.9
 -10 3 6 66.84 15.25
 -10 -3 6 65.17 16.08
 -9 3 6 58.86 12.48
 -9 3 6 54.35 13.36
 -9 -3 6 59.22 15.25
 -8 3 6 43.76 10.44
 -8 3 6 99.72 16.96
 -8 -3 6 69.53 15.39
 -7 3 6 48.77 11.29
 -7 3 6 36.4 9.73
 -7 -3 6 49.21 12.86
 -6 -3 6 25.39 9.88
 -6 3 6 18.69 7.22
 -6 3 6 28.68 9.27
 6 -3 -6 27.49 8.28
 5 -3 -6 28.31 8.33
 -5 -3 6 19.56 8.17
 -5 3 6 26.46 8.42
 -5 3 6 21.81 7.17
 4 -3 -6 83.87 13.27
 -4 3 6 74.57 13.68
 -4 3 6 83.35 12.86
 -3 3 6 44.64 9.17
 3 -3 -6 61.16 12.1
 -3 3 6 47.16 11.35
 2 -3 -6 14.89 6.06
 -2 -3 6 11.99 5.89
 -2 3 6 10.38 5.84
 -1 -3 6 51.55 12.03
 1 -3 -6 61.51 11.36
 -1 3 6 94.05 15.72
 0 -3 -6 14 5.78
 0 -3 6 16.19 7.19
 0 3 6 18.81 9.21
 1 -3 6 22.42 8.35
 1 3 6 28.64 9.77
 -1 -3 -6 32.38 8.4
 -2 -3 -6 4.22 3.85
 2 -3 6 -1.58 4.68
 -3 -3 -6 51.48 11.34
 3 -3 6 32.92 9.79
 3 3 6 30.78 10.66
 -4 -3 -6 4.63 3.97
 4 -3 6 12.79 5.33
 4 3 6 5.51 5.36
 5 -3 6 7.9 6.07
 -5 -3 -6 4.57 6.6
 5 3 6 5.17 5.48
 6 -3 6 3.2 3.87
 -6 -3 -6 2.34 3.84
 6 3 6 -0.7 4.81
 7 -3 6 -0.49 4.39
 -7 -3 -6 2.26 3.53
 7 3 6 -1.24 4.82
 8 -3 6 33.29 9.62
 8 3 6 42.93 14.22
 9 -3 6 20.63 7.9
 9 3 6 18.73 11.6
 10 3 6 15.09 11.26
 10 -3 6 4.21 3.9
 11 3 6 -1.88 7
 12 3 6 14.35 9.95
 -14 4 6 22.92 11.74
 -13 4 6 46.11 14.82
 -12 4 6 34.26 13.13
 -12 -4 6 35.01 12.91
 -11 4 6 20.71 9.84
 -11 -4 6 9.56 9.82
 -10 4 6 15.91 8.98
 -10 -4 6 10.91 7.16
 -9 4 6 -4.95 5.74
 -9 4 6 5.65 5.97
 -9 -4 6 6.19 5.86
 -8 4 6 7.43 6.95
 -8 4 6 13.45 6.06
 8 -4 -6 5.34 4.9
 -8 -4 6 23.24 9.36
 -7 -4 6 -6.45 7.02
 -7 4 6 -3.62 4.9
 -7 4 6 9.98 6.49
 7 -4 -6 2.9 3.76
 -6 -4 6 -5.84 7.79
 -6 4 6 -1.67 3.81
 -6 4 6 4.31 4.37
 6 -4 -6 2.82 4.5
 5 -4 -6 19.36 6.67
 -5 4 6 16.43 7.26
 -5 4 6 24.01 7.94
 4 -4 -6 2.07 4.52
 -4 4 6 0.14 4.12
 -4 4 6 13.18 7.97
 3 -4 -6 31.37 8.45
 -3 4 6 25.44 9.4
 2 -4 -6 23.34 7.44
 -2 4 6 13.68 7.18
 1 -4 -6 32.15 8.94
 0 -4 -6 24.41 7.39
 -1 -4 -6 3.28 3.58
 1 -4 6 3.05 6.59
 -2 -4 -6 51.25 11.1
 2 -4 6 30.5 9.91
 2 4 6 38.9 10.67
 -3 -4 -6 155.69 19.73
 3 -4 6 171.44 21.24
 3 4 6 162.83 23.62
 -4 -4 -6 151.71 20.05
 4 -4 6 143.19 19.6
 4 4 6 123.32 21.02
 -5 -4 -6 46.33 11.51
 5 -4 6 53 12.14
 5 4 6 66.31 16.26
 -6 -4 -6 24.7 9
 6 -4 6 10.87 6.29
 6 4 6 24.77 11.5
 -7 -4 -6 3.84 5.05
 7 -4 6 6.2 4.96
 7 4 6 2.34 4.75
 8 -4 6 -4.67 4.91
 -8 -4 -6 5.66 4.69
 8 4 6 3.45 6.21
 9 -4 6 3.31 4.24
 9 4 6 6.02 7.83
 10 4 6 9.1 8.75
 11 4 6 -6.64 8.87
 12 4 6 13.1 8.72
 -12 -5 6 41.82 14.29
 -11 -5 6 5.68 6.02
 10 -5 -6 4.64 6.09
 -10 -5 6 1.69 6.45
 9 -5 -6 1.77 3.89
 -9 -5 6 -6.92 8.15
 -9 5 6 -1.5 2.9
 -8 -5 6 -6.69 7.57
 -8 5 6 -0.2 5.53
 -8 5 6 -1.97 4.52
 8 -5 -6 -1.64 3.67
 -7 -5 6 -1.93 4.98
 -7 5 6 -3.11 4.85
 -7 5 6 12.19 6.67
 7 -5 -6 10.66 7
 6 -5 -6 38.94 10.89
 -6 5 6 29.98 9.66
 -6 -5 6 35.13 11.18
 5 -5 -6 14.81 6.87
 -5 5 6 16.2 7.44
 4 -5 -6 -0.15 4.31
 -4 5 6 -2.14 4.28
 3 -5 -6 26.3 8.29
 -3 5 6 40.47 10.78
 2 -5 -6 10.88 5.87
 1 -5 -6 16.13 6.94
 0 -5 -6 4.86 5.47
 -1 -5 -6 107.72 16.53
 1 5 6 87.09 16.08
 -2 -5 -6 13.25 7.2
 2 5 6 -4.01 4.79
 -3 -5 -6 55.23 12.54
 3 5 6 68.82 15.35
 -4 -5 -6 21.58 8.19
 4 5 6 22.77 9.97
 -5 -5 -6 0.08 3.59
 5 5 6 -2.41 6.03
 -6 -5 -6 11.11 8.1
 6 5 6 11.61 9.32
 -7 -5 -6 31.57 10.89
 7 5 6 45.63 15.22
 -8 -5 -6 -0.78 4.9
 8 5 6 -5.15 8.73
 -9 -5 -6 10.86 7.52
 9 5 6 0.75 6.65
 10 5 6 2.81 7.15
 11 5 6 4.84 7.48
 11 -6 -6 12.48 9.03
 -11 -6 6 -2.18 6.22
 10 -6 -6 0.95 4.31
 -10 -6 6 -2.82 6.44
 -9 -6 6 12.81 6.8
 9 -6 -6 28.86 11.2
 -8 -6 6 9.11 7.33
 -8 6 6 15.11 6.64
 8 -6 -6 12.23 7.89
 -7 6 6 3.04 3.11
 -7 -6 6 1.21 6.31
 7 -6 -6 -3.07 5.08
 6 -6 -6 28.94 10.11
 -6 6 6 11.5 5.79
 5 -6 -6 10.27 6.5
 -5 6 6 8.88 6.56
 4 -6 -6 -2.96 3.94
 3 -6 -6 23.78 9.02
 2 -6 -6 13.24 6.65
 1 -6 -6 61.67 13.92
 0 -6 -6 27.76 9.56
 0 6 6 27.69 9.22
 -1 -6 -6 72.86 14.74
 1 6 6 87.24 15.94
 -2 -6 -6 82.99 15.45
 2 6 6 83.73 16.33
 -3 -6 -6 41.9 11.57
 3 6 6 25.06 10.38
 -4 -6 -6 16.68 7.44
 4 6 6 22.34 10.38
 -5 -6 -6 11.37 6.47
 5 6 6 -2.6 6.51
 6 6 6 22.05 11.3
 -6 -6 -6 24.14 9.83
 7 6 6 11.85 10.54
 -7 -6 -6 12.21 6.55
 8 6 6 2.79 7.11
 -8 -6 -6 5.56 6.25
 9 6 6 4.54 7.02
 -9 -6 -6 2.98 6.29
 10 6 6 16.93 10.89
 -10 -6 -6 -3.53 4.25
 11 6 6 21.74 12.89
 12 -7 -6 10.55 8.45
 -11 -7 6 25.03 11.05
 11 -7 -6 20.15 11.43
 -10 -7 6 22.38 11.92
 10 -7 -6 21.21 9.93
 -9 -7 6 18.27 7.47
 9 -7 -6 45.94 13.26
 -8 7 6 80.68 14.56
 -8 -7 6 98.65 19.43
 8 -7 -6 93.01 19.03
 7 -7 -6 65.54 15.04
 -7 7 6 53.45 12.45
 6 -7 -6 33.13 11.13
 -6 7 6 34.82 10.21
 5 -7 -6 115.7 19.13
 4 -7 -6 3.84 4.02
 3 -7 -6 34.43 10.65
 2 -7 -6 34.58 9.82
 1 -7 -6 53.71 13.53
 0 -7 -6 38.86 10.56
 0 7 6 35.98 9.53
 -1 -7 -6 57.43 13.37
 1 7 6 75.49 15.51
 -2 -7 -6 32.6 10.66
 2 7 6 27.9 8.84
 -3 -7 -6 35.44 10.8
 3 7 6 50.43 13.52
 4 7 6 0.5 5.42
 -4 -7 -6 5.8 5.98
 5 7 6 17.97 9.92
 -5 -7 -6 1.13 4.55
 6 7 6 23.41 11.05
 -6 -7 -6 18.23 8.41
 7 7 6 14.58 9.31
 -7 -7 -6 22.94 10.23
 8 7 6 -7.72 8.23
 -8 -7 -6 -10.09 7.27
 9 7 6 34.5 15.08
 -9 -7 -6 36.52 13.22
 10 7 6 61.35 19.43
 -10 -7 -6 50.8 16.2
 11 7 6 7.9 11.27
 -11 -7 -6 14.5 9.57
 12 -8 -6 14.84 8.92
 11 -8 -6 -4.08 9.03
 -10 -8 6 -6.11 5.62
 10 -8 -6 -1.53 5.37
 -9 -8 6 -4.43 8.18
 9 -8 -6 -1.28 3.66
 -8 8 6 13.14 7.35
 8 -8 -6 8.92 6.29
 7 -8 -6 -8.37 6.37
 -7 8 6 11.76 7.18
 6 -8 -6 21.86 9.07
 5 -8 -6 36.43 11.48
 4 -8 -6 43.55 12.35
 3 -8 -6 105.5 18.6
 2 -8 -6 1.34 3.71
 1 -8 -6 3.94 6.23
 0 -8 -6 6.31 6.13
 -1 -8 -6 65.91 14.67
 1 8 6 65.49 14.11
 2 8 6 57.65 14.38
 -2 -8 -6 62.42 14.47
 3 8 6 64.81 15.75
 -3 -8 -6 58.23 14.49
 4 8 6 44.06 13.84
 -4 -8 -6 34.14 11.33
 5 8 6 32.38 12.61
 -5 -8 -6 7.1 6.25
 6 8 6 30.14 11.8
 -6 -8 -6 31.54 11.39
 7 8 6 -0.29 5.45
 -7 -8 -6 3.35 4.21
 8 8 6 5.64 9.79
 -8 -8 -6 -2.19 4.52
 9 8 6 2.02 7.33
 -9 -8 -6 3.56 5.29
 10 8 6 16.68 12.59
 -10 -8 -6 5.49 8.12
 -11 -8 -6 30.38 15.18
 11 -9 -6 8.82 6.54
 10 -9 -6 27.98 12.41
 9 -9 -6 8.58 7.35
 8 -9 -6 83.83 19.12
 7 -9 -6 109.91 21.03
 6 -9 -6 19.71 8.8
 5 -9 -6 22.16 9.05
 4 -9 -6 36.16 11.78
 3 -9 -6 32.69 10.42
 2 -9 -6 96.34 18.06
 1 -9 -6 138.96 22.37
 0 -9 -6 7.66 6.13
 -1 -9 -6 38.91 11.75
 2 9 6 26.83 10.86
 -2 -9 -6 31.83 11.59
 3 9 6 28.2 11.18
 -3 -9 -6 -1.2 4.45
 4 9 6 42.88 13.77
 -4 -9 -6 28.74 10.38
 5 9 6 7.57 8.36
 -5 -9 -6 -7.57 7.44
 6 9 6 6.99 7.54
 -6 -9 -6 25.09 11.27
 7 9 6 18.51 11.61
 -7 -9 -6 24.09 10.94
 8 9 6 70.36 19.53
 -8 -9 -6 68.95 18.2
 9 9 6 32.28 14.7
 -9 -9 -6 37.05 14.52
 10 9 6 49.71 18
 -10 -9 -6 63.98 19.64
 10 -10 -6 3.98 5.47
 9 -10 -6 3.88 5.89
 8 -10 -6 52.87 15.22
 7 -10 -6 8.26 10.53
 6 -10 -6 76.08 17.54
 5 -10 -6 67.88 16.7
 4 -10 -6 28.84 10.8
 3 -10 -6 85.78 18.05
 2 -10 -6 15.99 8.34
 1 -10 -6 67.31 15.85
 0 -10 -6 -3.75 5.22
 -1 -10 -6 36.16 11.89
 -2 -10 -6 3.83 6.64
 3 10 6 49.33 14.92
 -3 -10 -6 63.28 15.75
 4 10 6 35.7 13.86
 -4 -10 -6 29.41 10.91
 5 10 6 27.95 12.4
 -5 -10 -6 5.88 5.42
 6 10 6 31.21 15.24
 -6 -10 -6 17.06 9.79
 7 10 6 12.63 11.72
 -7 -10 -6 15.74 9.9
 8 10 6 7.84 12.3
 -8 -10 -6 -4.87 7.99
 9 10 6 11.44 12.45
 -9 -10 -6 34.01 14.15
 9 -11 -6 6.22 7.18
 8 -11 -6 27.01 12.29
 7 -11 -6 16.71 9.46
 6 -11 -6 13.64 8.86
 5 -11 -6 21.66 10.35
 4 -11 -6 -2.8 6.06
 3 -11 -6 4.19 6.04
 2 -11 -6 31.07 10.82
 1 -11 -6 86.93 18.8
 0 -11 -6 19.73 9.44
 -1 -11 -6 112.59 21.39
 -2 -11 -6 80.53 18.22
 3 11 6 28.23 12.11
 -3 -11 -6 12.76 7.38
 4 11 6 11.19 7.62
 -4 -11 -6 12.53 7.71
 5 11 6 58.65 18.27
 -5 -11 -6 49.24 15.65
 6 11 6 32.21 14.01
 -6 -11 -6 44.9 14.79
 7 11 6 51.31 16.92
 -7 -11 -6 54.04 16.96
 8 11 6 63.87 19.8
 -8 -11 -6 15.33 8.52
 -8 11 -6 37.88 14.07
 8 -12 -6 6.9 6.27
 7 -12 -6 6.62 6.62
 6 -12 -6 27.19 11.64
 5 -12 -6 4.18 5.33
 4 -12 -6 4.1 6.27
 3 -12 -6 34.31 12.12
 2 -12 -6 8.72 7.15
 1 -12 -6 1.24 6.07
 0 -12 -6 -2.27 5.45
 -1 -12 -6 5.22 6.82
 -2 -12 -6 20.59 10.11
 -3 -12 -6 167.53 27.47
 4 12 6 92.13 21.63
 -4 -12 -6 116.74 23.09
 -5 -12 -6 75.45 18.84
 -6 -12 -6 31.44 12.59
 -7 12 -6 3.28 6.28
 5 -13 -6 16.02 11.35
 4 -13 -6 -1.68 4.47
 3 -13 -6 2.7 4.54
 2 -13 -6 -4.76 5.66
 1 -13 -6 18.74 8.66
 0 -13 -6 38.99 14
 -1 -13 -6 85.87 19.93
 -2 -13 -6 50.45 14.51
 -3 -13 -6 13.82 9.05
 -4 -13 -6 1.6 4.64
 -5 13 -6 -7.68 8.13
 -6 13 -6 -12.87 11.42
 -3 14 -6 60.39 17.04
 -4 14 -6 44.89 14.93
 -5 14 -6 14.49 8.39
 -12 0 7 1.73 6.68
 -11 0 7 -1.64 7.51
 -10 0 7 4.79 7.03
 -9 0 7 3.5 5.67
 -8 0 7 -7.83 6.99
 -7 0 7 -8.21 6.25
 -7 0 7 3.23 3.81
 -6 0 7 -6.92 7.17
 -6 0 7 3.77 5.05
 -5 0 7 0.94 3.94
 -5 0 7 -4.78 6.6
 -4 0 7 -3.93 6.35
 -3 0 7 -3.02 5.45
 -2 0 7 -2.29 4.96
 -1 0 7 1.56 3.96
 0 0 7 10.91 7.22
 1 0 7 3.48 4.68
 2 0 7 -3.53 4.9
 3 0 7 1.95 5.37
 4 0 7 -3.08 5.74
 5 0 7 -1.16 5.79
 6 0 7 -0.42 4.33
 7 0 7 8.72 5.93
 8 0 7 2.83 4.69
 9 0 7 -5.27 5.14
 10 0 7 -9.7 6.32
 -12 1 7 11.95 8.55
 -12 -1 7 11.1 11.1
 -11 1 7 27.04 10.8
 -11 -1 7 45.62 15.33
 -10 1 7 0.08 4.44
 -10 -1 7 -3.34 5.96
 -9 1 7 39.2 12.34
 -9 -1 7 26.94 11.2
 -8 1 7 12.56 7.17
 -8 1 7 10.11 8.03
 -8 -1 7 11.59 8.58
 -7 -1 7 0.26 4.23
 -7 1 7 -1.22 4.99
 -7 1 7 1.4 4.89
 -6 1 7 -0.11 5.48
 -6 -1 7 -2.43 6.76
 -6 1 7 4.8 5.79
 -5 1 7 16.58 7.54
 -5 1 7 19.31 7.8
 -5 -1 7 20.36 9.42
 -4 1 7 1.52 4.1
 -4 -1 7 -0.62 4.25
 -3 -1 7 -0.48 3.51
 -3 1 7 8.52 6.13
 -2 -1 7 12.45 7.41
 -2 1 7 18.92 9.39
 -1 -1 7 13.81 6.49
 -1 1 7 15.71 8.19
 0 -1 7 6.94 6.51
 0 1 7 7.04 5.72
 1 -1 7 7.45 6.38
 1 1 7 5.8 4.66
 2 1 7 5.98 4.72
 2 -1 7 20.17 8.66
 3 1 7 -2.04 4.88
 3 -1 7 0.36 4.76
 4 1 7 6.25 7.13
 4 -1 7 -2.05 5.37
 5 1 7 17.83 8.14
 5 -1 7 11.41 7.8
 6 1 7 33.45 10.7
 6 -1 7 39.46 11.66
 7 1 7 16.2 7.63
 7 -1 7 20.75 8.5
 8 1 7 10.22 7.46
 8 -1 7 18.9 9.25
 9 1 7 -2.71 5.5
 9 -1 7 2.03 3.79
 10 1 7 8.63 5.2
 10 -1 7 -0.4 3.8
 -12 2 7 10.29 7.66
 -11 2 7 8.54 6.35
 -11 -2 7 15.19 8.49
 -10 2 7 9.99 6.76
 -10 -2 7 -3.7 6.35
 -9 2 7 5.27 4.81
 -9 2 7 0.52 3.81
 -9 -2 7 3.51 5.15
 -8 -2 7 7.19 6.34
 -8 2 7 7.71 5.44
 -8 2 7 5.63 5.95
 -7 -2 7 34.17 11.02
 -7 2 7 60.23 13.75
 -7 2 7 36.58 10.9
 -6 -2 7 -11.85 8.59
 -6 2 7 -5.42 6.27
 -5 2 7 4.66 3.92
 -4 2 7 4.06 5.15
 -4 -2 7 -2.05 4.77
 -3 -2 7 0.31 4.2
 -3 2 7 3.27 5.51
 -2 2 7 10.72 6.7
 -2 -2 7 6.71 5.96
 -1 -2 7 12.45 6.52
 -1 2 7 2.53 4.96
 0 2 7 2.14 5.12
 0 -2 7 -3.23 7.09
 1 2 7 5.36 4.7
 1 -2 7 10.29 6.27
 2 2 7 33.41 10.92
 2 -2 7 21.07 9.49
 3 -2 7 7.21 5.33
 3 2 7 9.47 6.86
 4 -2 7 75.92 15.57
 4 2 7 86.25 16.92
 5 -2 7 19.42 8.43
 5 2 7 32.84 12.05
 6 -2 7 -0.99 4.34
 6 2 7 18.15 9.25
 7 -2 7 3.92 5.08
 7 2 7 41.02 12.52
 8 -2 7 56.41 13.95
 8 2 7 56.15 14.09
 9 -2 7 18.76 9.31
 9 2 7 25.28 12.66
 9 2 7 12.52 7.52
 10 -2 7 17.12 7.83
 10 2 7 -5.47 7.62
 10 2 7 9.48 6.79
 11 2 7 0.97 4.58
 -11 -3 7 53.49 15.92
 -10 -3 7 20.13 9.93
 -9 3 7 70.77 14.54
 -9 -3 7 88.45 18.72
 -8 -3 7 -5.59 7.13
 -8 3 7 -0.35 5.19
 -7 -3 7 11.61 6.68
 -7 3 7 17.14 7.29
 -6 3 7 52.68 12.25
 -5 3 7 43.94 11.6
 -4 3 7 5.97 5.9
 -3 3 7 74.37 15.43
 -2 3 7 19.75 8.73
 -2 -3 7 24.23 10.58
 -1 -3 7 5.92 7.13
 -1 3 7 1.09 6.2
 0 -3 7 56.31 14.33
 0 3 7 41.52 11.68
 1 -3 7 8.43 7.36
 1 3 7 26.96 9.63
 2 -3 7 38.02 11.55
 2 3 7 48.71 12.99
 3 -3 7 6.88 6.8
 3 3 7 5.65 7.68
 4 -3 7 18.95 9.04
 4 3 7 20.31 9.81
 5 3 7 28.15 11.48
 5 -3 7 24.68 9.32
 -6 -3 -7 131.34 20.22
 6 3 7 107.77 22.26
 6 3 7 92.34 18.07
 6 -3 7 97.95 17.45
 -7 -3 -7 24.64 9.06
 7 3 7 19.22 8.65
 7 3 7 13.06 8.72
 7 -3 7 21.82 8.75
 8 -3 7 5.22 4.88
 -8 -3 -7 6.44 6.51
 8 3 7 4.18 5.31
 8 3 7 -8.64 11.23
 9 -3 7 8.63 5.51
 -9 -3 -7 24.89 11.47
 9 3 7 13.86 8.09
 9 3 7 -2.78 7.94
 10 3 7 8.34 6.69
 10 3 7 51.33 18.71
 11 3 7 8.97 7.4
 -10 -4 7 36.33 13.48
 -9 -4 7 45.66 13.88
 -9 4 7 46.92 11.92
 -8 -4 7 75.81 17.75
 -8 4 7 92.63 16.84
 -7 4 7 152.87 21.33
 -6 4 7 70.62 14.46
 -5 4 7 73.07 14.73
 -4 4 7 9.48 6.56
 -3 4 7 20.67 8.67
 -2 4 7 11.9 7.47
 -1 4 7 9.55 7.69
 0 4 7 10.95 9.27
 1 4 7 42.5 12.67
 1 -4 7 29.2 10.79
 2 -4 7 36.98 10.91
 2 4 7 83.02 16.65
 3 4 7 41.95 12.74
 3 -4 7 53.95 13.34
 -3 -4 -7 35.45 10.11
 4 4 7 177.12 24.64
 -4 -4 -7 159.69 22.26
 4 -4 7 163.95 22.87
 -5 -4 -7 13.54 6.54
 5 -4 7 14.08 7.01
 5 4 7 19.22 8.52
 6 -4 7 -3.58 5.64
 -6 -4 -7 13.41 7.25
 6 4 7 1.58 5.13
 -7 -4 -7 3.88 5.02
 7 -4 7 -2.39 5.62
 7 4 7 0.13 7.12
 8 -4 7 48.71 12.75
 -8 -4 -7 65.55 16.96
 8 4 7 59.27 19.08
 9 4 7 50.14 13.44
 -9 -4 -7 41.17 13.64
 9 4 7 88.5 22.92
 9 -4 7 65.8 14.66
 10 4 7 46.22 14.12
 -10 -4 -7 51.73 15.46
 10 4 7 40.88 17.28
 11 4 7 16.1 9.2
 -11 -4 -7 1.6 5.68
 -10 -5 7 42.11 14.16
 -9 -5 7 71.68 17.79
 -8 -5 7 -3.2 7.03
 -8 5 7 0.46 3.61
 -7 5 7 -2.3 3.97
 -6 5 7 3.6 3.82
 -5 5 7 4.44 6.7
 -4 5 7 3.58 6.27
 -3 5 7 85.16 16.78
 -2 5 7 23.51 10.14
 -1 5 7 22.37 11.2
 0 5 7 98.69 18.32
 0 -5 -7 88.87 15.93
 -1 -5 -7 43.14 11.07
 -2 -5 -7 1.05 4.37
 -3 -5 -7 40.26 11.14
 3 5 7 46.49 14.91
 -4 -5 -7 73.15 15.49
 4 5 7 48.83 15.37
 -5 -5 -7 51.25 13.7
 5 5 7 38.22 13.72
 -6 -5 -7 139.09 22.11
 6 5 7 124.16 25.08
 -7 -5 -7 16.62 8.4
 7 5 7 20.47 9.99
 -8 -5 -7 1.79 4.33
 8 5 7 9.54 7.86
 -9 -5 -7 2.13 5.76
 9 5 7 2.62 8.23
 -10 -5 -7 -6.6 6.66
 -11 -5 -7 2.23 4.2
 -9 -6 7 16.66 9.03
 -8 6 7 58.53 13.69
 -7 6 7 152.48 21.45
 -6 6 7 22.9 9.52
 -5 6 7 16.23 8.64
 -4 6 7 13.39 8.86
 -3 6 7 9.91 7.99
 2 -6 -7 -1.14 2.87
 -2 6 7 10.81 8.92
 1 -6 -7 37.64 12.44
 0 -6 -7 -3.5 3.94
 -1 -6 -7 55.07 12.91
 -2 -6 -7 250.92 28.18
 2 6 7 225.32 28.72
 -3 -6 -7 86.03 16.67
 3 6 7 95.92 19.28
 -4 -6 -7 135.55 21.44
 4 6 7 151.49 25.4
 -5 -6 -7 37.01 12.29
 5 6 7 63.86 17.78
 -6 -6 -7 10.4 7.44
 6 6 7 11.51 10.15
 -7 -6 -7 3.04 5.21
 7 6 7 4.44 6.02
 -8 -6 -7 58.26 15.84
 8 6 7 59.87 18.78
 -9 -6 -7 20.8 10.03
 9 6 7 -3.19 9.8
 -10 -6 -7 2.95 6.55
 -8 7 7 -0.65 4.85
 -7 7 7 25.69 9.59
 -6 7 7 5.15 4.87
 -5 7 7 12.05 7.44
 4 -7 -7 12.48 6.61
 -4 7 7 18.98 9
 3 -7 -7 89.07 16.93
 -3 7 7 80.59 16.99
 2 -7 -7 62.41 14.23
 1 -7 -7 49.64 12.58
 0 -7 -7 22.59 9.07
 -1 -7 -7 -7.48 5.63
 -2 -7 -7 9.35 7.55
 2 7 7 -2.3 6.35
 -3 -7 -7 17.64 8.09
 3 7 7 33.11 12.51
 -4 -7 -7 55.02 14.5
 4 7 7 48.6 15.24
 -5 -7 -7 10.97 7.92
 5 7 7 14.35 9.36
 -6 -7 -7 5.77 5.99
 6 7 7 2.85 6.49
 -7 -7 -7 2.96 5.84
 7 7 7 9.31 9.04
 -8 -7 -7 19.55 10.05
 8 7 7 30.39 13.6
 -9 -7 -7 11.58 9.22
 9 7 7 12.47 10.01
 -10 -7 -7 8.61 8.15
 -7 8 7 41.87 12.01
 -6 8 7 65.76 15.61
 5 -8 -7 126.37 21.65
 -5 8 7 109.66 19.26
 4 -8 -7 35.22 11.33
 3 -8 -7 2.68 3.73
 2 -8 -7 -10.08 6.62
 1 -8 -7 24.2 9.58
 0 -8 -7 30.06 10.62
 -1 -8 -7 25.73 9.48
 -2 -8 -7 -0.71 3.51
 -3 -8 -7 30.71 11.22
 3 8 7 20.47 10.07
 -4 -8 -7 5.8 6.26
 4 8 7 -1.73 6.7
 -5 -8 -7 8.66 7.17
 5 8 7 -3.85 6.66
 -6 -8 -7 7.87 8.44
 6 8 7 -6.87 7.21
 -7 -8 -7 -8.81 7.39
 7 8 7 1.71 5.63
 -8 -8 -7 7.07 7.4
 8 8 7 13.12 11.51
 -9 -8 -7 12.04 9.24
 7 -9 -7 8.39 7.16
 -7 9 7 0.65 4.03
 6 -9 -7 5.07 6.33
 -6 9 7 18.86 8.37
 5 -9 -7 6.14 6.31
 4 -9 -7 14.43 7.33
 3 -9 -7 36.1 11.87
 2 -9 -7 30.52 10.92
 1 -9 -7 43.91 13.11
 0 -9 -7 0.43 3.64
 -1 -9 -7 18.04 8.8
 -2 -9 -7 3.5 4.69
 -3 -9 -7 8.83 6.8
 -4 -9 -7 0.07 4.15
 4 9 7 -4.12 7.85
 -5 -9 -7 4.41 6.63
 5 9 7 10.37 9.44
 -6 -9 -7 -1.13 4.26
 6 9 7 -8.34 9.94
 -7 -9 -7 -1.13 4.62
 7 9 7 -2.6 7
 8 9 7 15.6 13.88
 -8 -9 -7 32.71 13.56
 7 -10 -7 -1.48 3.67
 6 -10 -7 3.71 3.82
 -6 10 7 9.64 7.39
 5 -10 -7 12.71 9.23
 4 -10 -7 -0.01 5.05
 3 -10 -7 25.85 10.59
 2 -10 -7 8.06 7.4
 1 -10 -7 35.07 12.76
 0 -10 -7 30.6 11.96
 -1 -10 -7 22.89 11
 -2 -10 -7 12.32 7.89
 -3 -10 -7 -4.44 5.54
 -4 -10 -7 -1.72 4.39
 5 10 7 -9.08 8.26
 -5 -10 -7 -8.93 7.41
 6 10 7 2.22 7.43
 -6 -10 -7 2.73 5.76
 7 10 7 4.24 8.13
 -7 -10 -7 1.52 8.15
 6 -11 -7 8.39 8.1
 5 -11 -7 21.54 11.22
 4 -11 -7 4.05 7.05
 3 -11 -7 11.3 7.96
 2 -11 -7 -2.91 5.84
 1 -11 -7 8.39 8.02
 0 -11 -7 4.06 6.17
 -1 -11 -7 7.86 8.28
 -2 -11 -7 -7.22 6.78
 -3 -11 -7 -0.61 4.81
 -4 -11 -7 6.45 7.43
 -5 -11 -7 0.42 3.94
 6 11 7 5.8 6.83
 4 -12 -7 8.05 8.15
 3 -12 -7 1.47 3.55
 2 -12 -7 -1.46 5.31
 1 -12 -7 7.98 7.47
 0 -12 -7 0.82 5.19
 -1 -12 -7 -3.33 6.74
 -2 -12 -7 0.08 4.22
 -6 0 8 6.93 7.07
 -5 0 8 6.42 5.53
 -4 0 8 18.19 8.23
 -3 0 8 7.14 7.96
 -2 0 8 87.64 17.95
 -1 0 8 102.53 19.55
 0 0 8 206.94 27.5
 1 0 8 130.15 21.96
 2 0 8 39.42 13.19
 3 0 8 6.75 6.65
 4 0 8 31.4 10.07
 5 0 8 13.54 7.33
 6 0 8 4.38 5.99
 7 0 8 10.81 6.41
 8 0 8 15.94 8.85
 9 0 8 40 12.73
 -9 -1 8 -3.61 7.32
 -7 1 8 10.29 8.45
 -6 1 8 2.48 5.56
 -5 1 8 30 10.77
 -4 1 8 51.2 14.07
 -4 -1 8 56.41 14.98
 -3 1 8 6.6 5.38
 -3 -1 8 19.75 8.58
 -2 1 8 112.26 20.07
 -2 -1 8 92.35 18.71
 -1 -1 8 26.19 10.57
 -1 1 8 19.3 10.08
 0 -1 8 2.68 4.63
 0 1 8 -0.85 4.51
 1 -1 8 4.61 5.63
 1 1 8 5.15 5.53
 2 -1 8 5.57 6.67
 2 1 8 24.39 9.81
 3 -1 8 4.02 5.01
 3 1 8 10.35 7.77
 4 -1 8 19.31 9.76
 4 1 8 12.88 7.89
 5 -1 8 32.58 10.86
 5 1 8 10.05 8.09
 6 -1 8 0.4 5.57
 6 1 8 -0.72 5.4
 7 -1 8 -0.16 5.58
 7 1 8 -1.34 4.1
 8 -1 8 1.47 5.03
 8 1 8 -1.75 4.82
 9 -1 8 0.35 5.14
 9 1 8 12.99 8.68
 -9 -2 8 11.58 6.32
 -8 2 8 8.34 6.22
 -7 2 8 26.54 10.08
 -6 2 8 39.61 12.51
 -5 2 8 9.4 6.8
 -4 2 8 5.69 5
 -3 -2 8 36.12 11.72
 -3 2 8 33.64 11.25
 -2 2 8 128.65 21.52
 -2 -2 8 80.53 17.44
 -1 2 8 13.99 8.68
 -1 -2 8 20.2 8.53
 0 -2 8 47.07 13.31
 0 2 8 47.01 13.27
 1 -2 8 36.46 12.34
 1 2 8 20.82 9.82
 2 2 8 1.56 6.29
 2 -2 8 4.57 4.05
 3 2 8 4.86 5.36
 3 -2 8 7.19 7.14
 4 2 8 6.88 5.88
 4 -2 8 20.35 10.08
 5 2 8 23.74 11.04
 5 -2 8 4.11 6.68
 6 2 8 12.33 6.93
 6 -2 8 26.83 10.82
 7 2 8 5.38 6.62
 7 -2 8 4.69 7.17
 8 2 8 5.03 6.94
 8 -2 8 0.45 5.06
 9 -2 8 17.74 9.31
 -9 -3 8 23.37 11.19
 -8 3 8 6.01 6.43
 -7 3 8 26.74 10.86
 -6 3 8 3.03 5.43
 -5 3 8 0.5 6.01
 -4 3 8 -9.18 7.81
 -3 3 8 10.22 7.24
 -2 3 8 5.84 7.65
 -1 3 8 12.9 8.52
 0 3 8 3.52 5.92
 0 -3 8 0.14 4.66
 1 3 8 4.34 6.6
 1 -3 8 -3.05 5.8
 2 3 8 43.01 12.73
 2 -3 8 39.87 13.14
 3 3 8 30.29 11.17
 3 -3 8 18.74 9.32
 4 3 8 8.07 7.19
 4 -3 8 7.12 5.48
 5 3 8 8.49 7.12
 5 -3 8 2.84 5.15
 6 -3 8 3.13 4.17
 6 3 8 5.78 6.77
 7 -3 8 -0.7 5.3
 7 3 8 3.17 5.58
 8 -3 8 1.92 6.49
 -8 4 8 12.38 6.97
 -7 4 8 -2.35 4.5
 -6 4 8 -4.96 6.66
 -5 4 8 4.35 5.51
 -4 4 8 6.16 4.97
 -3 4 8 4.75 6.18
 -2 4 8 15.78 7.58
 -1 4 8 2.24 5.34
 0 4 8 2.15 5.18
 1 4 8 14.07 9
 2 4 8 37.77 12.55
 3 4 8 -0.57 4.74
 4 -4 8 2.1 4.14
 4 4 8 13.4 8.76
 5 -4 8 -0.84 5.86
 5 4 8 -0.02 5.71
 6 -4 8 -5.05 7.14
 6 4 8 8.23 5.97
 -7 5 8 -5.49 5.69
 -6 5 8 0.41 4.21
 -5 5 8 -3.55 6.01
 -4 5 8 7.37 5.43
 -3 5 8 16.9 8.86
 -2 5 8 12.85 8.74
 -1 5 8 1.98 6.78
 0 5 8 -3.75 5.25
 1 5 8 32.48 11.98
 2 5 8 33.07 11.82
 3 5 8 7.97 7.43
 4 5 8 13.84 9.12
 5 5 8 39.05 13.6
 -7 6 8 4.22 5.73
 -6 6 8 5.18 6.9
 -5 6 8 17.89 8.27
 -4 6 8 23.52 10.53
 -3 6 8 7.95 7.12
 -2 6 8 11.46 9.88
 -1 6 8 -2.3 5.93
 0 6 8 28.3 11.07
 1 6 8 44.9 14.41
 2 6 8 13.54 9.36
 3 6 8 23.65 11.5
 6 6 8 -14.29 11.99
 7 6 8 10.27 7.84
 -6 7 8 2.76 4.93
 -5 7 8 3.29 6.54
 -4 7 8 19.77 10.31
 -3 7 8 17.57 9.68
 -2 7 8 19.52 9.97
 -1 7 8 3.45 7.29
 5 7 8 3.86 7.14
 6 7 8 -13.1 9.88

_iucr_refine_instructions_details
;
TITL 0922-yf-jm-i1310_a.res in P2(1)/c
REM Old TITL 0922-yf-jm-i1310 in P21/c #14
REM SHELXT solution in P2(1)/c
REM R1 0.133, Rweak 0.046, Alpha 0.035, Orientation as input
REM Formula found by SHELXT: C16 Cl1 Cu N2 O
CELL 0.71073 14.3656 14.9057 6.8654 90 90.238 90
ZERR 4 0.001 0.0008 0.0004 0 0.006 0
LATT 1
SYMM -X,0.5+Y,0.5-Z
SFAC C H Cl Cu N O
UNIT 64 40 8 4 8 4
 
L.S. 4
PLAN  5
TEMP 23
CONF
BOND $H
list 4
MORE -1
fmap 2
acta
OMIT 0 50
REM <olex2.extras>
REM <HklSrc "%.\\0922-yf-jm-i1310.hkl">
REM </olex2.extras>
 
WGHT    0.025700
FVAR       0.35910
CU1   4    0.557987    0.702657    0.376307    11.00000    0.03074    0.01967 =
         0.03897   -0.00297    0.00477   -0.00160
CL2   3    0.621908    0.828266    0.254615    11.00000    0.03872    0.02310 =
         0.04172    0.00584    0.00111   -0.00380
CL1   3    0.106942    0.699781    0.629683    11.00000    0.03135    0.06428 =
         0.05704   -0.00926    0.00941    0.00942
O1    6    0.447857    0.759044    0.490763    11.00000    0.02856    0.02272 =
         0.03547   -0.00267    0.00375   -0.00146
N1    5    0.475541    0.600531    0.340669    11.00000    0.02617    0.01969 =
         0.02034    0.00198    0.00102    0.00205
N2    5    0.651970    0.608301    0.273065    11.00000    0.02500    0.02192 =
         0.02343    0.00072    0.00026    0.00096
C007  1    0.608192    0.534357    0.213770    11.00000    0.02954    0.02026 =
         0.02312    0.00133    0.00275    0.00340
C008  1    0.509375    0.531885    0.255349    11.00000    0.03024    0.02045 =
         0.02333    0.00084   -0.00267   -0.00189
AFIX  43
H008  2    0.472600    0.482893    0.221649    11.00000   -1.20000
AFIX   0
C009  1    0.376199    0.704930    0.483532    11.00000    0.03052    0.02427 =
         0.02083    0.00405    0.00015    0.00398
C00A  1    0.652896    0.462286    0.122244    11.00000    0.03470    0.02328 =
         0.02688   -0.00195   -0.00115    0.00292
AFIX  43
H00A  2    0.619705    0.411913    0.082385    11.00000   -1.20000
AFIX   0
C00B  1    0.747283    0.612487    0.252556    11.00000    0.03060    0.02595 =
         0.02832    0.00472    0.00338    0.00237
C00C  1    0.287592    0.728773    0.555194    11.00000    0.03443    0.02612 =
         0.02485   -0.00299   -0.00043    0.00725
AFIX  43
H00C  2    0.278568    0.783941    0.615505    11.00000   -1.20000
AFIX   0
C00D  1    0.384466    0.617808    0.401341    11.00000    0.02890    0.01980 =
         0.02364    0.00197    0.00649    0.00044
C00E  1    0.309210    0.560299    0.382287    11.00000    0.03845    0.02284 =
         0.02488   -0.00191    0.00097    0.00281
AFIX  43
H00E  2    0.317191    0.504245    0.325259    11.00000   -1.20000
AFIX   0
C00F  1    0.796213    0.542955    0.156838    11.00000    0.03193    0.03348 =
         0.03172   -0.00071    0.00376   -0.00125
C00G  1    0.215556    0.670199    0.535091    11.00000    0.03298    0.04046 =
         0.02577    0.00237    0.00139    0.01034
C00H  1    0.797317    0.685070    0.332658    11.00000    0.03541    0.02997 =
         0.05100   -0.00383    0.00366    0.00049
AFIX  43
H00H  2    0.766097    0.730725    0.397633    11.00000   -1.20000
AFIX   0
C00I  1    0.746487    0.468299    0.093464    11.00000    0.04054    0.03343 =
         0.03271   -0.00655    0.00638    0.01002
AFIX  43
H00I  2    0.777521    0.421891    0.030639    11.00000   -1.20000
AFIX   0
C00J  1    0.222555    0.585848    0.447535    11.00000    0.02418    0.04156 =
         0.03158    0.00011   -0.00126   -0.00536
AFIX  43
H00J  2    0.171013    0.548587    0.433887    11.00000   -1.20000
AFIX   0
C00K  1    0.891606    0.687989    0.314403    11.00000    0.03498    0.04116 =
         0.07467   -0.00247    0.00407   -0.01099
AFIX  43
H00K  2    0.924359    0.735922    0.367817    11.00000   -1.20000
AFIX   0
C00L  1    0.893060    0.548963    0.142423    11.00000    0.03368    0.04856 =
         0.07041   -0.01047    0.01839    0.00107
AFIX  43
H00L  2    0.925854    0.503349    0.080794    11.00000   -1.20000
AFIX   0
C00M  1    0.940133    0.620387    0.216999    11.00000    0.03143    0.06113 =
         0.09028   -0.00156    0.01564   -0.00481
AFIX  43
H00M  2    1.004385    0.624216    0.203211    11.00000   -1.20000
HKLF 4
 
REM  0922-yf-jm-i1310_a.res in P2(1)/c
REM R1 =  0.0461 for   1898 Fo > 4sig(Fo)  and  0.0715 for all   2581 data
REM    199 parameters refined using      0 restraints
 
END  
     
WGHT      0.0257      0.0000 
REM Highest difference peak  0.332,  deepest hole -0.381,  1-sigma level  0.080
Q1    1   0.5761  0.5189  0.2916  11.00000  0.05    0.33
Q2    1   0.6064  0.6351  0.3731  11.00000  0.05    0.32
Q3    1   1.0377  0.5951  0.2208  11.00000  0.05    0.31
Q4    1   0.5072  0.6434  0.3603  11.00000  0.05    0.29
Q5    1   0.5622  0.7150  0.2041  11.00000  0.05    0.29

  REM The information below was added by Olex2.
  REM
  REM R1 = 0.0461 for 1898 Fo > 4sig(Fo) and 0.0715 for all 8446 data
  REM 199 parameters refined using n/a restraints
  REM Highest difference peak 0.33, deepest hole -0.38
  REM Mean Shift 0, Max Shift -0.001.

  REM +++ Tabular Listing of Refinement Information +++
  REM R1_all = 0.0715
  REM R1_gt = 0.0461
  REM wR_ref = 0.0933
  REM GOOF = 1.076
  REM Shift_max = -0.001
  REM Shift_mean = 0
  REM Reflections_all = 8446
  REM Reflections_gt = 1898
  REM Parameters = 199
  REM Hole = -0.38
  REM Peak = 0.33
  REM Flack = n/a
;
_olex2_submission_special_instructions  'No special instructions were received'
