# Supplementary material for: Anticancer Activity and Mode of Action of Cu(II), Zn(II), and Mn(II) Complexes with 5-Chloro-2-N-(2-quinolylmethylene)aminophenol
Source: Molecules. 2023 Jun 20;28(12):4876. doi: 10.3390/molecules28124876 (PMC10300901; doi:10.3390/molecules28124876)
Supplement: Supplementary file 1 [file molecules-28-04876-s001.zip › C2.cif]

data_ov_1124-yf-jm-ii06
_audit_creation_date               2023-06-01
_audit_creation_method
;
Olex2 1.2
(compiled 2018.05.29 svn.r3508 for OlexSys, GUI svn.r5506)
;
_audit_contact_author_address      ?
_audit_contact_author_email        ?
_audit_contact_author_name         ''
_audit_contact_author_phone        ?
_publ_contact_author_id_orcid      ?
_publ_section_references
;
Dolomanov, O.V., Bourhis, L.J., Gildea, R.J, Howard, J.A.K. & Puschmann, H.
 (2009), J. Appl. Cryst. 42, 339-341.

Sheldrick, G.M. (2008). Acta Cryst. A64, 112-122.
;
_chemical_name_common              ?
_chemical_name_systematic
;
 ? 
;
_chemical_formula_moiety           'C21 H15 Cl2 N3 O Zn'
_chemical_formula_sum              'C21 H15 Cl2 N3 O Zn'
_chemical_formula_weight           461.63
_chemical_melting_point            ?
loop_
  _atom_type_symbol
  _atom_type_description
  _atom_type_scat_dispersion_real
  _atom_type_scat_dispersion_imag
  _atom_type_scat_source
 'C' 'C' 0.0033 0.0016 'International Tables Vol C Tables 4.2.6.8 and 6.1.1.4'
 'H' 'H' 0.0000 0.0000 'International Tables Vol C Tables 4.2.6.8 and 6.1.1.4'
 'Cl' 'Cl' 0.1484 0.1585 'International Tables Vol C Tables 4.2.6.8 and 6.1.1.4'
 'N' 'N' 0.0061 0.0033 'International Tables Vol C Tables 4.2.6.8 and 6.1.1.4'
 'O' 'O' 0.0106 0.0060 'International Tables Vol C Tables 4.2.6.8 and 6.1.1.4'
 'Zn' 'Zn' 0.2839 1.4301 'International Tables Vol C Tables 4.2.6.8 and 6.1.1.4'

_space_group_crystal_system        'triclinic'
_space_group_IT_number             2
_space_group_name_H-M_alt          'P -1'
_space_group_name_Hall             '-P 1'
loop_
  _space_group_symop_id
  _space_group_symop_operation_xyz
 1 'x, y, z'
 2 '-x, -y, -z'

_cell_length_a                     9.607(5)
_cell_length_b                     10.533(6)
_cell_length_c                     11.070(7)
_cell_angle_alpha                  79.41(5)
_cell_angle_beta                   64.70(6)
_cell_angle_gamma                  87.98(4)
_cell_volume                       994.3(10)
_cell_formula_units_Z              2
_cell_measurement_reflns_used      3352
_cell_measurement_temperature      293(2)
_cell_measurement_theta_max        0.21
_cell_measurement_theta_min        0.19
_exptl_absorpt_coefficient_mu      1.520
_exptl_absorpt_correction_T_max    0.7715
_exptl_absorpt_correction_T_min    0.7309
_exptl_absorpt_correction_type     ?
_exptl_absorpt_process_details     ?
_exptl_crystal_colour              'dull dark brown'
_exptl_crystal_colour_lustre       dull
_exptl_crystal_colour_modifier     dark
_exptl_crystal_colour_primary      brown
_exptl_crystal_density_diffrn      1.542
_exptl_crystal_density_meas        ?
_exptl_crystal_density_method      'not measured'
_exptl_crystal_description         block
_exptl_crystal_F_000               468
_exptl_crystal_size_max            0.22
_exptl_crystal_size_mid            0.19
_exptl_crystal_size_min            0.18
_exptl_special_details
;
 ? 
;
_diffrn_reflns_av_R_equivalents    0.0826
_diffrn_reflns_av_unetI/netI       0.1103
_diffrn_reflns_limit_h_max         11
_diffrn_reflns_limit_h_min         -11
_diffrn_reflns_limit_k_max         12
_diffrn_reflns_limit_k_min         -12
_diffrn_reflns_limit_l_max         13
_diffrn_reflns_limit_l_min         -13
_diffrn_reflns_number              7331
_diffrn_reflns_theta_full          25.02
_diffrn_reflns_theta_max           25.02
_diffrn_reflns_theta_min           3.11
_diffrn_ambient_temperature        296.15
_diffrn_detector_area_resol_mean   ?
_diffrn_measured_fraction_theta_full  0.982
_diffrn_measured_fraction_theta_max  0.982
_diffrn_measurement_device_type     'Bruker SMART APEX CCD' 
_diffrn_measurement_method         ?
_diffrn_radiation_monochromator    graphite
_diffrn_radiation_type             MoK\a
_diffrn_radiation_wavelength       0.71073
_diffrn_source                     'fine-focus sealed tube'
_diffrn_standards_decay_%          ?
_diffrn_standards_interval_count   ?
_diffrn_standards_interval_time    ?
_diffrn_standards_number           ?
_reflns_number_gt                  2072
_reflns_number_total               3451
_reflns_threshold_expression       >2sigma(I)
_computing_cell_refinement         ?
_computing_data_collection         ?
_computing_data_reduction          ?
_computing_molecular_graphics      'Olex2 (Dolomanov et al., 2009)'
_computing_publication_material    'Olex2 (Dolomanov et al., 2009)'
_computing_structure_refinement    'XL (Sheldrick, 2008)'
_computing_structure_solution      'SHELXS-97 (Sheldrick, 1990)'
_refine_diff_density_max           1.085
_refine_diff_density_min           -1.148
_refine_diff_density_rms           0.129
_refine_ls_extinction_coef         ?
_refine_ls_extinction_method       none
_refine_ls_goodness_of_fit_ref     1.009
_refine_ls_hydrogen_treatment      constr
_refine_ls_matrix_type             full
_refine_ls_number_parameters       253
_refine_ls_number_reflns           3451
_refine_ls_number_restraints       0
_refine_ls_R_factor_all            0.1161
_refine_ls_R_factor_gt             0.0751
_refine_ls_restrained_S_all        1.009
_refine_ls_shift/su_max            0.000
_refine_ls_shift/su_mean           0.000
_refine_ls_structure_factor_coef   Fsqd
_refine_ls_weighting_details      
 'calc w=1/[\s^2^(Fo^2^)+(0.1336P)^2^+0.0000P] where P=(Fo^2^+2Fc^2^)/3'
_refine_ls_weighting_scheme        calc
_refine_ls_wR_factor_gt            0.1902
_refine_ls_wR_factor_ref           0.2492
_refine_special_details
;
 Refinement of F^2^ against ALL reflections.  The weighted R-factor wR and 
 goodness of fit S are based on F^2^, conventional R-factors R are based 
 on F, with F set to zero for negative F^2^. The threshold expression of 
 F^2^ > 2sigma(F^2^) is used only for calculating R-factors(gt) etc. and is 
 not relevant to the choice of reflections for refinement.  R-factors based 
 on F^2^ are statistically about twice as large as those based on F, and R- 
 factors based on ALL data will be even larger. 
;
_olex2_refinement_description
;
1. Fixed Uiso
 At 1.2 times of:
  All C(H) groups
2.a Aromatic/amide H refined with riding coordinates:
 C7(H7), C11(H11), C13(H13), C15(H15), C16(H16), C17(H17), C20(H20), C21(H21),
 C23(H23), C25(H25), C26(H26), C27(H27), C28(H28), C30(H30), C31(H31)
;
_atom_sites_solution_hydrogens     geom
_atom_sites_solution_primary       direct
_atom_sites_solution_secondary     difmap
loop_
  _atom_site_label
  _atom_site_type_symbol
  _atom_site_fract_x
  _atom_site_fract_y
  _atom_site_fract_z
  _atom_site_U_iso_or_equiv
  _atom_site_adp_type
  _atom_site_occupancy
  _atom_site_calc_flag
  _atom_site_disorder_assembly
  _atom_site_disorder_group
  _atom_site_refinement_flags_posn
 Zn1 Zn 0.48044(8) 0.13471(8) 0.26357(7) 0.0515(4) Uani 1 d . . .
 Cl Cl 0.1250(3) 0.5609(3) 0.6850(3) 0.1034(9) Uani 1 d . . .
 N N 0.7044(5) 0.0218(5) 0.2430(5) 0.0442(13) Uani 1 d . . .
 C4 C 0.3254(8) 0.3086(7) 0.4403(6) 0.0524(17) Uani 1 d . . .
 O O 0.3134(5) 0.2629(5) 0.3451(5) 0.0623(13) Uani 1 d . . .
 C6 C 0.4415(7) 0.2636(7) 0.4851(7) 0.0504(16) Uani 1 d . . .
 C7 C 0.3565(10) 0.3982(8) 0.6548(8) 0.070(2) Uani 1 d . . .
 H7 H 0.3637 0.4284 0.7258 0.084 Uiso 1 calc . . R
 C9 C 0.9087(7) -0.1271(7) 0.1741(6) 0.0501(16) Uani 1 d . . .
 C10 C 0.7855(7) -0.0614(7) 0.1600(7) 0.0475(16) Uani 1 d . . .
 C11 C 0.2267(8) 0.4020(8) 0.5069(7) 0.065(2) Uani 1 d . . .
 H11 H 0.1498 0.4345 0.4816 0.079 Uiso 1 calc . . R
 C13 C 0.7136(9) 0.4782(8) -0.0172(9) 0.075(2) Uani 1 d . . .
 H13 H 0.7577 0.5513 -0.0087 0.089 Uiso 1 calc . . R
 N0AA N 0.5385(6) 0.1757(6) 0.4118(6) 0.0507(14) Uani 1 d . . .
 C15 C 0.5890(8) 0.2627(8) -0.0341(7) 0.0574(18) Uani 1 d . . .
 H15 H 0.5458 0.1886 -0.0416 0.069 Uiso 1 calc . . R
 C16 C 0.9478(8) -0.2254(7) -0.0160(8) 0.062(2) Uani 1 d . . .
 H16 H 1.0032 -0.2790 -0.0766 0.075 Uiso 1 calc . . R
 C17 C 0.6476(9) 0.3597(9) -0.1455(8) 0.074(2) Uani 1 d . . .
 H17 H 0.6465 0.3500 -0.2269 0.089 Uiso 1 calc . . R
 N1AA N 0.5902(6) 0.2682(5) 0.0845(5) 0.0486(13) Uani 1 d . . .
 C20 C 0.6566(8) 0.1285(7) 0.4257(7) 0.0577(19) Uani 1 d . . .
 H20 H 0.6847 0.1509 0.4900 0.069 Uiso 1 calc . . R
 C21 C 0.6530(8) 0.3758(7) 0.0915(7) 0.0603(19) Uani 1 d . . .
 H21 H 0.6563 0.3824 0.1728 0.072 Uiso 1 calc . . R
 C22 C 0.2464(9) 0.4433(8) 0.6088(8) 0.067(2) Uani 1 d . . .
 C23 C 0.7441(7) -0.0784(7) 0.0556(7) 0.0555(18) Uani 1 d . . .
 H23 H 0.6635 -0.0343 0.0448 0.067 Uiso 1 calc . . R
 C24 C 0.7460(7) 0.0392(7) 0.3389(6) 0.0463(15) Uani 1 d . . .
 C25 C 0.4540(9) 0.3081(8) 0.5927(7) 0.063(2) Uani 1 d . . .
 H25 H 0.5284 0.2763 0.6216 0.075 Uiso 1 calc . . R
 C26 C 0.9878(8) -0.2108(7) 0.0840(8) 0.0605(19) Uani 1 d . . .
 H26 H 1.0683 -0.2565 0.0934 0.073 Uiso 1 calc . . R
 C27 C 0.9520(7) -0.1043(8) 0.2752(8) 0.063(2) Uani 1 d . . .
 H27 H 1.0354 -0.1445 0.2848 0.075 Uiso 1 calc . . R
 C28 C 0.7080(9) 0.4712(8) -0.1363(8) 0.069(2) Uani 1 d . . .
 H28 H 0.7442 0.5402 -0.2094 0.083 Uiso 1 calc . . R
 C30 C 0.8251(8) -0.1612(7) -0.0291(7) 0.0598(19) Uani 1 d . . .
 H30 H 0.7972 -0.1746 -0.0968 0.072 Uiso 1 calc . . R
 C31 C 0.8700(7) -0.0229(8) 0.3575(7) 0.060(2) Uani 1 d . . .
 H31 H 0.8948 -0.0077 0.4263 0.072 Uiso 1 calc . . R
 Cl0A Cl 0.34490(19) -0.02458(18) 0.24977(18) 0.0579(5) Uani 1 d . . .

loop_
  _atom_site_aniso_label
  _atom_site_aniso_U_11
  _atom_site_aniso_U_22
  _atom_site_aniso_U_33
  _atom_site_aniso_U_23
  _atom_site_aniso_U_13
  _atom_site_aniso_U_12
 Zn1 0.0582(6) 0.0537(6) 0.0451(6) -0.0145(4) -0.0218(4) -0.0046(4)
 Cl 0.0867(15) 0.0887(19) 0.113(2) -0.0624(16) -0.0051(14) 0.0053(13)
 N 0.039(3) 0.052(4) 0.041(3) -0.011(2) -0.015(2) -0.005(2)
 C4 0.063(4) 0.053(4) 0.031(3) -0.014(3) -0.007(3) -0.011(3)
 O 0.062(3) 0.079(4) 0.049(3) -0.024(3) -0.022(2) 0.010(3)
 C6 0.052(4) 0.051(4) 0.043(4) -0.010(3) -0.013(3) -0.013(3)
 C7 0.080(5) 0.064(6) 0.063(5) -0.033(4) -0.019(4) -0.004(4)
 C9 0.036(3) 0.061(4) 0.046(4) -0.008(3) -0.010(3) -0.011(3)
 C10 0.038(3) 0.058(4) 0.043(4) -0.009(3) -0.014(3) -0.007(3)
 C11 0.054(4) 0.072(6) 0.054(5) -0.020(4) -0.005(3) -0.007(4)
 C13 0.067(5) 0.068(6) 0.072(6) -0.019(5) -0.010(4) -0.012(4)
 N0AA 0.045(3) 0.055(4) 0.048(3) -0.013(3) -0.014(2) -0.006(3)
 C15 0.058(4) 0.067(5) 0.053(4) -0.020(4) -0.025(3) -0.007(4)
 C16 0.060(4) 0.050(5) 0.072(5) -0.030(4) -0.017(4) 0.004(4)
 C17 0.069(5) 0.095(8) 0.061(5) -0.003(5) -0.035(4) -0.002(5)
 N1AA 0.052(3) 0.052(4) 0.041(3) -0.018(3) -0.014(2) -0.004(3)
 C20 0.060(4) 0.063(5) 0.042(4) -0.007(3) -0.014(3) -0.019(4)
 C21 0.065(4) 0.057(5) 0.054(5) -0.019(4) -0.017(4) -0.008(4)
 C22 0.067(5) 0.046(4) 0.059(5) -0.015(4) 0.004(4) -0.003(4)
 C23 0.046(4) 0.064(5) 0.058(4) -0.017(4) -0.021(3) -0.002(3)
 C24 0.045(3) 0.052(4) 0.041(4) -0.007(3) -0.018(3) -0.003(3)
 C25 0.072(5) 0.070(5) 0.055(5) -0.024(4) -0.029(4) -0.011(4)
 C26 0.046(4) 0.053(5) 0.077(5) -0.016(4) -0.020(4) 0.009(3)
 C27 0.038(3) 0.079(6) 0.070(5) -0.010(4) -0.025(3) -0.001(3)
 C28 0.065(5) 0.066(6) 0.059(5) 0.016(4) -0.021(4) -0.004(4)
 C30 0.068(5) 0.057(5) 0.062(5) -0.020(4) -0.031(4) 0.005(4)
 C31 0.049(4) 0.087(6) 0.052(4) -0.019(4) -0.024(3) -0.009(4)
 Cl0A 0.0585(10) 0.0621(12) 0.0602(11) -0.0158(9) -0.0294(9) -0.0105(8)

_geom_special_details
;
 All esds (except the esd in the dihedral angle between two l.s. planes) 
 are estimated using the full covariance matrix.  The cell esds are taken 
 into account individually in the estimation of esds in distances, angles 
 and torsion angles; correlations between esds in cell parameters are only 
 used when they are defined by crystal symmetry.  An approximate (isotropic) 
 treatment of cell esds is used for estimating esds involving l.s. planes. 
;
loop_
  _geom_bond_atom_site_label_1
  _geom_bond_atom_site_label_2
  _geom_bond_distance
  _geom_bond_site_symmetry_2
  _geom_bond_publ_flag
 Zn1 N 2.365(5) . ?
 Zn1 O 2.066(5) . ?
 Zn1 N0AA 2.061(6) . ?
 Zn1 N1AA 2.077(6) . ?
 Zn1 Cl0A 2.225(2) . ?
 Cl C22 1.747(7) . ?
 N C10 1.362(8) . ?
 N C24 1.326(8) . ?
 C4 O 1.285(7) . ?
 C4 C6 1.437(10) . ?
 C4 C11 1.419(10) . ?
 C6 N0AA 1.397(8) . ?
 C6 C25 1.409(9) . ?
 C7 H7 0.9300 . ?
 C7 C22 1.393(12) . ?
 C7 C25 1.370(11) . ?
 C9 C10 1.401(9) . ?
 C9 C26 1.406(9) . ?
 C9 C27 1.409(9) . ?
 C10 C23 1.414(9) . ?
 C11 H11 0.9300 . ?
 C11 C22 1.366(10) . ?
 C13 H13 0.9300 . ?
 C13 C21 1.386(11) . ?
 C13 C28 1.357(11) . ?
 N0AA C20 1.281(9) . ?
 C15 H15 0.9300 . ?
 C15 C17 1.366(11) . ?
 C15 N1AA 1.329(8) . ?
 C16 H16 0.9300 . ?
 C16 C26 1.351(10) . ?
 C16 C30 1.387(10) . ?
 C17 H17 0.9300 . ?
 C17 C28 1.367(11) . ?
 N1AA C21 1.332(9) . ?
 C20 H20 0.9300 . ?
 C20 C24 1.455(9) . ?
 C21 H21 0.9300 . ?
 C23 H23 0.9300 . ?
 C23 C30 1.369(9) . ?
 C24 C31 1.412(9) . ?
 C25 H25 0.9300 . ?
 C26 H26 0.9300 . ?
 C27 H27 0.9300 . ?
 C27 C31 1.345(10) . ?
 C28 H28 0.9300 . ?
 C30 H30 0.9300 . ?
 C31 H31 0.9300 . ?

loop_
  _geom_angle_atom_site_label_1
  _geom_angle_atom_site_label_2
  _geom_angle_atom_site_label_3
  _geom_angle
  _geom_angle_site_symmetry_1
  _geom_angle_site_symmetry_3
  _geom_angle_publ_flag
 O Zn1 N 153.16(19) . . ?
 O Zn1 N1AA 91.4(2) . . ?
 O Zn1 Cl0A 102.48(16) . . ?
 N0AA Zn1 N 73.3(2) . . ?
 N0AA Zn1 O 80.0(2) . . ?
 N0AA Zn1 N1AA 110.2(2) . . ?
 N0AA Zn1 Cl0A 134.60(18) . . ?
 N1AA Zn1 N 95.2(2) . . ?
 N1AA Zn1 Cl0A 114.96(16) . . ?
 Cl0A Zn1 N 98.25(14) . . ?
 C10 N Zn1 131.7(4) . . ?
 C24 N Zn1 110.5(4) . . ?
 C24 N C10 117.6(5) . . ?
 O C4 C6 119.8(6) . . ?
 O C4 C11 123.0(7) . . ?
 C11 C4 C6 117.1(6) . . ?
 C4 O Zn1 113.5(4) . . ?
 N0AA C6 C4 114.1(6) . . ?
 N0AA C6 C25 124.6(7) . . ?
 C25 C6 C4 121.3(7) . . ?
 C22 C7 H7 120.9 . . ?
 C25 C7 H7 120.9 . . ?
 C25 C7 C22 118.3(7) . . ?
 C10 C9 C26 118.7(6) . . ?
 C10 C9 C27 119.1(6) . . ?
 C26 C9 C27 122.2(7) . . ?
 N C10 C9 121.9(6) . . ?
 N C10 C23 118.0(6) . . ?
 C9 C10 C23 120.1(6) . . ?
 C4 C11 H11 120.6 . . ?
 C22 C11 C4 118.9(8) . . ?
 C22 C11 H11 120.6 . . ?
 C21 C13 H13 120.2 . . ?
 C28 C13 H13 120.2 . . ?
 C28 C13 C21 119.5(8) . . ?
 C6 N0AA Zn1 112.4(4) . . ?
 C20 N0AA Zn1 121.4(5) . . ?
 C20 N0AA C6 126.1(6) . . ?
 C17 C15 H15 118.1 . . ?
 N1AA C15 H15 118.1 . . ?
 N1AA C15 C17 123.7(7) . . ?
 C26 C16 H16 119.7 . . ?
 C26 C16 C30 120.6(6) . . ?
 C30 C16 H16 119.7 . . ?
 C15 C17 H17 120.3 . . ?
 C15 C17 C28 119.4(8) . . ?
 C28 C17 H17 120.3 . . ?
 C15 N1AA Zn1 125.6(5) . . ?
 C15 N1AA C21 116.4(6) . . ?
 C21 N1AA Zn1 117.5(5) . . ?
 N0AA C20 H20 120.7 . . ?
 N0AA C20 C24 118.6(6) . . ?
 C24 C20 H20 120.7 . . ?
 C13 C21 H21 118.6 . . ?
 N1AA C21 C13 122.8(7) . . ?
 N1AA C21 H21 118.6 . . ?
 C7 C22 Cl 118.4(6) . . ?
 C11 C22 Cl 117.2(7) . . ?
 C11 C22 C7 124.4(7) . . ?
 C10 C23 H23 120.6 . . ?
 C30 C23 C10 118.7(7) . . ?
 C30 C23 H23 120.6 . . ?
 N C24 C20 116.0(6) . . ?
 N C24 C31 123.3(6) . . ?
 C31 C24 C20 120.6(6) . . ?
 C6 C25 H25 120.0 . . ?
 C7 C25 C6 120.0(8) . . ?
 C7 C25 H25 120.0 . . ?
 C9 C26 H26 119.7 . . ?
 C16 C26 C9 120.6(7) . . ?
 C16 C26 H26 119.7 . . ?
 C9 C27 H27 120.8 . . ?
 C31 C27 C9 118.5(7) . . ?
 C31 C27 H27 120.8 . . ?
 C13 C28 C17 118.0(8) . . ?
 C13 C28 H28 121.0 . . ?
 C17 C28 H28 121.0 . . ?
 C16 C30 H30 119.4 . . ?
 C23 C30 C16 121.2(7) . . ?
 C23 C30 H30 119.4 . . ?
 C24 C31 H31 120.2 . . ?
 C27 C31 C24 119.6(6) . . ?
 C27 C31 H31 120.2 . . ?

loop_
  _geom_torsion_atom_site_label_1
  _geom_torsion_atom_site_label_2
  _geom_torsion_atom_site_label_3
  _geom_torsion_atom_site_label_4
  _geom_torsion
  _geom_torsion_site_symmetry_1
  _geom_torsion_site_symmetry_2
  _geom_torsion_site_symmetry_3
  _geom_torsion_site_symmetry_4
  _geom_torsion_publ_flag
 Zn1 N C10 C9 -174.0(5) . . . . ?
 Zn1 N C10 C23 7.3(9) . . . . ?
 Zn1 N C24 C20 -4.6(7) . . . . ?
 Zn1 N C24 C31 175.9(5) . . . . ?
 Zn1 N0AA C20 C24 -3.1(9) . . . . ?
 Zn1 N1AA C21 C13 -172.4(6) . . . . ?
 N Zn1 O C4 -4.0(8) . . . . ?
 N Zn1 N0AA C6 176.9(5) . . . . ?
 N Zn1 N0AA C20 0.4(5) . . . . ?
 N Zn1 N1AA C15 99.3(6) . . . . ?
 N Zn1 N1AA C21 -88.5(5) . . . . ?
 N C10 C23 C30 179.6(6) . . . . ?
 N C24 C31 C27 0.0(11) . . . . ?
 C4 C6 N0AA Zn1 -1.3(7) . . . . ?
 C4 C6 N0AA C20 174.9(6) . . . . ?
 C4 C6 C25 C7 -1.4(11) . . . . ?
 C4 C11 C22 Cl 178.6(5) . . . . ?
 C4 C11 C22 C7 -1.2(12) . . . . ?
 O Zn1 N C10 -177.0(5) . . . . ?
 O Zn1 N C24 8.6(7) . . . . ?
 O Zn1 N0AA C6 -0.3(4) . . . . ?
 O Zn1 N0AA C20 -176.8(6) . . . . ?
 O Zn1 N1AA C15 -106.7(6) . . . . ?
 O Zn1 N1AA C21 65.4(5) . . . . ?
 O C4 C6 N0AA 3.3(10) . . . . ?
 O C4 C6 C25 -177.6(6) . . . . ?
 O C4 C11 C22 178.8(7) . . . . ?
 C6 C4 O Zn1 -3.5(8) . . . . ?
 C6 C4 C11 C22 -0.2(10) . . . . ?
 C6 N0AA C20 C24 -179.1(6) . . . . ?
 C9 C10 C23 C30 1.0(10) . . . . ?
 C9 C27 C31 C24 -1.4(11) . . . . ?
 C10 N C24 C20 -179.9(6) . . . . ?
 C10 N C24 C31 0.7(10) . . . . ?
 C10 C9 C26 C16 1.5(11) . . . . ?
 C10 C9 C27 C31 2.0(10) . . . . ?
 C10 C23 C30 C16 -1.5(11) . . . . ?
 C11 C4 O Zn1 177.5(5) . . . . ?
 C11 C4 C6 N0AA -177.6(6) . . . . ?
 C11 C4 C6 C25 1.5(10) . . . . ?
 N0AA Zn1 N C10 176.8(6) . . . . ?
 N0AA Zn1 N C24 2.4(4) . . . . ?
 N0AA Zn1 O C4 2.0(5) . . . . ?
 N0AA Zn1 N1AA C15 173.4(5) . . . . ?
 N0AA Zn1 N1AA C21 -14.4(6) . . . . ?
 N0AA C6 C25 C7 177.5(7) . . . . ?
 N0AA C20 C24 N 5.4(9) . . . . ?
 N0AA C20 C24 C31 -175.1(6) . . . . ?
 C15 C17 C28 C13 3.1(12) . . . . ?
 C15 N1AA C21 C13 0.5(10) . . . . ?
 C17 C15 N1AA Zn1 172.2(6) . . . . ?
 C17 C15 N1AA C21 0.0(10) . . . . ?
 N1AA Zn1 N C10 -73.6(6) . . . . ?
 N1AA Zn1 N C24 112.1(5) . . . . ?
 N1AA Zn1 O C4 -108.3(5) . . . . ?
 N1AA Zn1 N0AA C6 87.5(5) . . . . ?
 N1AA Zn1 N0AA C20 -89.0(6) . . . . ?
 N1AA C15 C17 C28 -1.8(12) . . . . ?
 C20 C24 C31 C27 -179.4(7) . . . . ?
 C21 C13 C28 C17 -2.6(12) . . . . ?
 C22 C7 C25 C6 0.1(12) . . . . ?
 C24 N C10 C9 0.0(9) . . . . ?
 C24 N C10 C23 -178.6(6) . . . . ?
 C25 C6 N0AA Zn1 179.6(6) . . . . ?
 C25 C6 N0AA C20 -4.1(11) . . . . ?
 C25 C7 C22 Cl -178.5(6) . . . . ?
 C25 C7 C22 C11 1.3(13) . . . . ?
 C26 C9 C10 N -179.5(6) . . . . ?
 C26 C9 C10 C23 -0.9(10) . . . . ?
 C26 C9 C27 C31 -179.9(7) . . . . ?
 C26 C16 C30 C23 2.1(12) . . . . ?
 C27 C9 C10 N -1.3(10) . . . . ?
 C27 C9 C10 C23 177.3(7) . . . . ?
 C27 C9 C26 C16 -176.7(7) . . . . ?
 C28 C13 C21 N1AA 0.9(12) . . . . ?
 C30 C16 C26 C9 -2.0(12) . . . . ?
 Cl0A Zn1 N C10 42.6(6) . . . . ?
 Cl0A Zn1 N C24 -131.8(4) . . . . ?
 Cl0A Zn1 O C4 135.8(5) . . . . ?
 Cl0A Zn1 N0AA C6 -98.0(5) . . . . ?
 Cl0A Zn1 N0AA C20 85.5(6) . . . . ?
 Cl0A Zn1 N1AA C15 -2.2(6) . . . . ?
 Cl0A Zn1 N1AA C21 169.9(4) . . . . ?

_olex2_submission_special_instructions  'No special instructions were received'
